# Supplementary material for: Pulmonary arterial hypertension associated with connective tissue disease: meta-analysis of clinical trials
Source: PubMed Central journal article supplement — BMJ Open. 2013 Aug 1;3(8):e003113. doi: 10.1136/bmjopen-2013-003113 (PMC3733303; doi:10.1136/bmjopen-2013-003113), 2013-08-01
Supplement: bmjopen-2013-003113.draft_revisions.pdf [file bmjopen-2013-003113.draft_revisions.pdf]

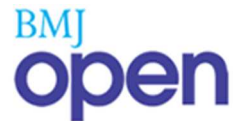

**Pulmonary arterial hypertension associated with connective tissue disease: meta-analysis of clinical trials**

|                                 |                                                                                                                                                                                                                                                                                                                                                               |
|---------------------------------|---------------------------------------------------------------------------------------------------------------------------------------------------------------------------------------------------------------------------------------------------------------------------------------------------------------------------------------------------------------|
| Journal:                        | <i>BMJ Open</i>                                                                                                                                                                                                                                                                                                                                               |
| Manuscript ID:                  | bmjopen-2013-003113                                                                                                                                                                                                                                                                                                                                           |
| Article Type:                   | Research                                                                                                                                                                                                                                                                                                                                                      |
| Date Submitted by the Author:   | 24-Apr-2013                                                                                                                                                                                                                                                                                                                                                   |
| Complete List of Authors:       | Kuwana, Masataka; Keio University School of Medicine, Department of Internal Medicine, Division of Rheumatology<br>Watanabe, Hiroshi; Hamamatsu University School of Medicine, Department of Clinical Pharmacology and Therapeutics<br>Matsuoka, Nobushige; Pfizer, Division of Clinical Statistics<br>Sugiyama, Naonobu; Pfizer, Division of Medical Affairs |
| <b>Primary Subject Heading</b>: | Rheumatology                                                                                                                                                                                                                                                                                                                                                  |
| Secondary Subject Heading:      | Cardiovascular medicine, Evidence based practice, Medical management, Pharmacology and therapeutics, Respiratory medicine                                                                                                                                                                                                                                     |
| Keywords:                       | Hypertension < CARDIOLOGY, Cardiology < INTERNAL MEDICINE, Dermatology < INTERNAL MEDICINE, Rheumatology < INTERNAL MEDICINE, Vascular medicine < INTERNAL MEDICINE, THORACIC MEDICINE                                                                                                                                                                        |
|                                 |                                                                                                                                                                                                                                                                                                                                                               |

SCHOLARONE™  
Manuscripts

only

1  
2  
3  
4 **Pulmonary arterial hypertension associated with connective tissue disease:**  
5  
6 **meta-analysis of clinical trials**  
7  
8  
9

10 Masataka Kuwana,<sup>1</sup> Hiroshi Watanabe,<sup>2</sup> Nobushige Matsuoka,<sup>3</sup> Naonobu Sugiyama<sup>4</sup>  
11  
12

13  
14  
15 <sup>1</sup>Division of Rheumatology, Department of Internal Medicine, Keio University School of  
16  
17  
18  
19  
20  
21  
22  
23  
24  
25  
26  
27  
28  
29  
30  
31  
32  
33  
34  
35  
36  
37  
38  
39  
40  
41  
42  
43  
44  
45  
46  
47  
48  
49  
50  
51  
52  
53  
54  
55  
56  
57  
58  
59  
60

Medicine, Tokyo, Japan

<sup>2</sup>Department of Clinical Pharmacology and Therapeutics, Hamamatsu University School of  
Medicine, Shizuoka, Japan

<sup>3</sup>Division of Clinical Statistics, Pfizer Japan Inc.

<sup>4</sup>Division of Medical Affairs, Pfizer Japan Inc.

**Correspondence to** Masataka Kuwana

Department of Internal Medicine, Division of Rheumatology, Keio University School of  
Medicine, 35 Shinanomachi, Shinjuku-ku, Tokyo 160-8582, Japan.

TEL: 81-3-3350-3567; FAX: 81-3-3350-3567

E-mail: kuwanam@z5.keio.jp

**Running head:** Pulmonary arterial hypertension associated with connective tissue disease

## Abstract

**Objectives:** Few studies have focused on pulmonary arterial hypertension (PAH) associated with connective tissue diseases (CTDs). The optimal treatment for CTD-PAH has yet to be established. **Design:** Meta-analysis of data from evaluations of treatment for PAH generally (19 studies) and CTD-PAH specifically (9 studies) to compare the effects of pulmonary vasodilative PAH agents. MEDLINE, EMBASE, and BIOSIS were searched. English-language full-text articles published between January 1990 and August 2012 were eligible. **Setting:** International. **Participants:** Patients with PAH generally ( $n=3073$ ) and CTD-PAH specifically ( $n=678$ ). **Primary outcome measure:** Exercise capacity (6-minute walk distance, 6MWD). **Results:** Patients with PAH (all forms) had mean age 32–55 years (women, 61–87%); CTD-PAH patients had mean age 45–55 years (women, 74–95%). Mean change in 6MWD from baseline (95%CI) for the active treatment group versus the control group in all PAH patients was 34.6 m (27.4, 41.9 m). Mean differences from the results for patients receiving placebo by subgroup of patients receiving phosphodiesterase (PDE)-5 inhibitors, endothelin receptor antagonists (ERAs), and prostacyclin (PGI<sub>2</sub>) analogues were 22.4–45.5 m, 39.5–44.2 m, and 12.4–64.9 m, respectively. Mean difference between changes in 6MWD in CTD-PAH patients was 34.2 m (23.3, 45.0 m). Mean differences by subgroup of patients receiving PDE-5 inhibitors, ERAs, and PGI<sub>2</sub> analogues in CTD-PAH patients were 37.0–47.1 m, 14.1–21.7 m, and 21.0–108.0 m, respectively. ERAs were less effective in CTD-PAH patients than all form-PAH patients: 14.1 m (–4.4, 32.6 m) versus 39.5 m (19.5, 59.6 m) for bosentan, and 21.7 m (2.2, 41.3 m) versus 44.2 m (30.2, 58.2 m) for ambrisentan. **Conclusions:** All 3 types of PAH agent are effective. However, ERAs may be a less effective

1  
2  
3  
4  
5  
6  
7  
8  
9  
10  
11  
12  
13  
14  
15  
16  
17  
18  
19  
20  
21  
22  
23  
24  
25  
26  
27  
28  
29  
30  
31  
32  
33  
34  
35  
36  
37  
38  
39  
40  
41  
42  
43  
44  
45  
46  
47  
48  
49  
50  
51  
52  
53  
54  
55  
56  
57  
58  
59  
60

choice against CTD-PAH; further studies are needed. Limitations include the limited number of studies for some agents and for CTD-PAH patients.

For peer review only

## Article summary

### Article focus

- Pulmonary arterial hypertension (PAH) is a progressive disease characterised by abnormally high blood pressure in the pulmonary arteries.
- Patients with PAH associated with connective tissue diseases (CTDs) such as systemic sclerosis (SSc) have a particularly poor prognosis.
- Few studies have focused on patients with CTD-PAH, so the optimal treatment for these patients is unclear.

### Key messages

- The effects of the phosphodiesterase-5 inhibitors sildenafil and tadalafil, and the prostacyclin analogue epoprostenol, are consistent in patients with CTD-PAH and in those with PAH generally.
- The endothelin receptor antagonists bosentan and ambrisentan may be less effective in patients with CTD-PAH than in those with PAH generally.

### Strengths and limitations of this study

- The meta-analysis used all currently available data from clinical studies on treatment for PAH.
- Few studies were identified for some PAH agents and for CTD-PAH patients.
- Study designs and patient background characteristics, including the percentages of patients with SSc-PAH, were inconsistent between studies.

## Introduction

Pulmonary hypertension is a heterogeneous condition with sustained elevation of pressure in the pulmonary arteries, and is defined as mean pulmonary artery pressure  $\geq 25$  mmHg at rest.<sup>1</sup> The most recent and widely accepted clinical classification of pulmonary hypertension is that proposed at the Fourth World Symposium on Pulmonary Hypertension at Dana Point in 2008.<sup>2</sup> It classifies pulmonary hypertension into 5 groups. Group 1 comprises pulmonary arterial hypertension (PAH), which includes idiopathic PAH, heritable PAH, drug- and toxin-induced PAH, PAH associated with various diseases, and persistent pulmonary hypertension of the newborn. Group 2 comprises pulmonary hypertension owing to left heart disease; group 3, pulmonary hypertension owing to lung diseases and/or hypoxia; group 4, chronic thromboembolic pulmonary hypertension; and group 5, pulmonary hypertension of unknown cause. In this classification of pulmonary hypertension, PAH is recognised as having an extremely poor prognosis and requires specific medical treatment.

Connective tissue disease (CTD) is the most common condition associated with PAH. Recent cohort studies have shown that most patients with PAH associated with CTD have systemic sclerosis (SSc).<sup>3,4</sup> In fact, the prevalence of PAH in patients with SSc is reported to be 7–12%.<sup>5,6</sup> Patients with SSc-PAH have poor prognosis compared with patients with idiopathic PAH.<sup>7</sup> Therefore, early and appropriate diagnosis and selection of the optimal treatment regimen are important for SSc-PAH, to improve the hemodynamics, exercise capacity, and eventually survival of patients.

The optimal treatment for PAH has not been established. However, there has been major progress in medical treatment for PAH in recent years. Several new agents with different

1  
2  
3 mechanisms have been introduced, including phosphodiesterase (PDE)-5 inhibitors (e.g. oral  
4 sildenafil and tadalafil), endothelin receptor antagonists (ERAs) (e.g. oral bosentan and  
5 ambrisentan), and prostacyclin (PGI<sub>2</sub>) analogues (e.g. continuous intravenous epoprostenol).  
6  
7  
8  
9  
10  
11 The introduction of these new agents is expected to contribute to the improvement of exercise  
12 capacity, subjective symptoms, and quality of life, as well as the short- and long-term  
13 survival of patients.  
14  
15  
16

17  
18 Although the efficacy and safety of these new agents have been shown in small- or  
19 medium-scale randomised controlled trials (RCTs) and open-label trials, evidence from  
20 large-scale comparative studies of these agents remains insufficient because PAH is a rare  
21 disease. Therefore, to compare the new agents and establish a therapeutic strategy for PAH,  
22 several systematic reviews and meta-analyses of available clinical study results have been  
23 done.<sup>8-13</sup> However, most of these analyses include studies on all forms of PAH, and studies  
24 that focus on CTD-PAH are limited. In fact, our literature search showed only one such  
25 report: a meta-analysis by Avouac *et al.*,<sup>8</sup> which investigated the efficacy of oral PAH agents  
26 mainly in patients with SSc.  
27  
28  
29  
30  
31  
32  
33  
34  
35  
36  
37  
38  
39

40 Therefore, in this meta-analysis of studies designed as RCTs and open-label, single-arm  
41 trials, we aimed to evaluate the effect of each PAH agent on exercise capacity in patients with  
42 CTD-PAH compared with patients with all forms of PAH. We chose 6-minute walk distance  
43 (6MWD) as an endpoint because it was used as a primary endpoint in most previous  
44 randomised studies of PAH agents.<sup>14</sup>  
45  
46  
47  
48  
49  
50  
51  
52  
53

## 54 **Methods**

55  
56  
57  
58  
59  
60

### *Eligibility criteria*

To evaluate the effects of 3 typical types of PAH agent, we included RCTs in which the following PAH agents were administered to patients with all forms of PAH.

- PDE-5 inhibitors: sildenafil and tadalafil
- ERAs: bosentan and ambrisentan
- PGI<sub>2</sub> analogues: epoprostenol, beraprost, iloprost, and treprostinil.

Because the number of RCTs in patients with CTD-PAH is limited, we also included open-label, single-arm trials evaluating the effects of PAH agents in patients with CTD-PAH.

Non-interventional studies (e.g. case reports and observational studies) were excluded.

Studies in which results for 6MWD were not reported were also excluded.

### *Search strategy*

We searched MEDLINE, EMBASE, and BIOSIS for English-language full-text articles published between January 1990 and August 2012, using the key terms ‘pulmonary arterial hypertension’, ‘6 minute walk’, and the names of individual drugs. In addition to these key terms, we used the term ‘randomised controlled trial’ or ‘RCT’ to identify RCTs evaluating all forms of PAH, and ‘connective tissue disease’ or ‘CTD’ to identify studies evaluating CTD-PAH. The last search was run on 5 December 2012. Additional studies were identified through manual searching.

### *Primary endpoint*

The primary outcome measure was the difference in mean change from baseline in 6MWD between groups. However, for single-arm studies, the mean change from baseline was used as



1  
2  
3  
4 the primary outcome measure.  
5  
6  
7

### 8 *Data collection*

9  
10 Relevant data were extracted and reviewed by NM and NS. Data on study characteristics  
11  
12 (year and design), variables including PAH agents used, total patient numbers and the  
13  
14 percentage of CTD-PAH patients, and outcomes were extracted.  
15  
16  
17

### 18 *Risk of bias*

19  
20 To determine the validity of the included studies, we assessed the risk of bias for each study  
21  
22 in terms of random sequence generation, allocation concealment, blinding, and other sources  
23  
24 of bias, as recommended by the Cochrane Collaboration. Each domain was judged to have  
25  
26 high, low, or unclear risk of bias. We did not detect clear publication bias, because the  
27  
28 number of included studies was small.  
29  
30  
31  
32  
33  
34  
35  
36

### 37 *Statistical analysis*

38  
39 We pooled outcomes using a random effects model by each PAH agent for all forms of PAH  
40  
41 and CTD-PAH. Heterogeneity was assessed using the  $I^2$  statistic, which describes the  
42  
43 percentage of variability in effect estimates that is due to heterogeneity rather than sampling  
44  
45 error (chance).  
46  
47  
48  
49  
50

## 51 **Results**

### 52 *Selection of studies*

1  
2  
3  
4 A total of 196 articles were identified for evaluation of treatments for all forms of PAH. Of  
5  
6 these, 19 articles (reporting data from 3073 patients) met the eligibility criteria for  
7  
8 evaluations of treatments for all forms of PAH (3 articles for sildenafil,<sup>15-17</sup> 1 article for  
9  
10 tadalafil,<sup>18</sup> 4 articles for bosentan,<sup>19-22</sup> 1 article for ambrisentan,<sup>23</sup> 3 articles for  
11  
12 epoprostenol,<sup>24-26</sup> 1 article for beraprost,<sup>27</sup> 2 articles for iloprost,<sup>28,29</sup> and 4 articles for  
13  
14 treprostinil<sup>30-33</sup>) (figure 1a). The main reasons for exclusion were that the article was a review  
15  
16 and that the article reported the results of a study that involved patients other than those with  
17  
18 PAH.  
19  
20  
21

22  
23 For evaluation of treatments for CTD-PAH, a total of 269 articles were identified. Of these,  
24  
25 9 articles (reporting data from 678 patients) met the eligibility criteria for evaluations of  
26  
27 treatments for CTD-PAH (1 article for sildenafil,<sup>34</sup> 1 article for tadalafil,<sup>18</sup> 2 articles for  
28  
29 bosentan,<sup>35,36</sup> 2 articles for ambrisentan,<sup>37,38</sup> 1 article for epoprostenol,<sup>26</sup> 1 article for  
30  
31 beraprost,<sup>39</sup> and 1 article for treprostinil<sup>40</sup>) (figure 1b). The main reasons for exclusion were  
32  
33 that the article was a review and that the article reported the results of a study that involved  
34  
35 patients other than those with CTD-PAH.  
36  
37  
38  
39  
40  
41

#### 42 *Characteristics and overview of the included studies*

43  
44 Of the 19 studies on treatments for all forms of PAH included in this analysis (table 1), 15  
45  
46 were randomised, placebo-controlled, double-blind studies;<sup>15-23,27,28,30-33</sup> 3 were randomised,  
47  
48 open-label studies comparing with conventional treatment;<sup>24-26</sup> and 1 was a randomised,  
49  
50 open-label study evaluating the effects of iloprost when added to bosentan.<sup>29</sup> The observation  
51  
52 period was either 12 or 16 weeks in most of the studies, with some exceptions (1 study each  
53  
54 with 6- and 24-week observation periods,<sup>16,22</sup> and 2 studies with an 8-week observation  
55  
56  
57  
58  
59  
60

1  
2  
3  
4 period<sup>24 31</sup>). Of the placebo-controlled randomised comparative studies, 1 study of sildenafil  
5  
6 was done in patients previously treated with epoprostenol;<sup>17</sup> 2 studies of iloprost, in patients  
7  
8 previously treated with bosentan,<sup>28 29</sup> and 1 study of treprostinil, in patients previously treated  
9  
10 with bosentan or sildenafil.<sup>32</sup>

11  
12  
13 Of the 9 studies on treatments for CTD-PAH included in this analysis (table 2), 5 were  
14  
15 placebo-controlled, double-blind studies,<sup>18 34 35 37 40</sup> 1 was a randomised, open-label study  
16  
17 comparing with conventional treatment,<sup>26</sup> and 3 were open-label, single-arm studies.<sup>36 38 39</sup>  
18  
19 The observation period in these studies was 8–28 weeks. One study each evaluating  
20  
21 bosentan<sup>36</sup> and epoprostenol<sup>26</sup> included only SSc-PAH patients.  
22  
23  
24  
25  
26  
27

### 28 *Background of all PAH patients*

29  
30 The background of all PAH patients, based on data from the 19 studies, can be summarised as  
31  
32 follows (full data in supplementary table 1). Mean age was 32–55 years, and the percentage  
33  
34 of women was 61–87%. In the studies of sildenafil,<sup>15–17</sup> tadalafil,<sup>18</sup> ambrisentan,<sup>23</sup> and  
35  
36 beraprost,<sup>27</sup> most patients were classified according to World Health Organisation functional  
37  
38 class (WHO-FC) as in WHO-FC II or III, with 1 study including only patients in  
39  
40 WHO-FC II.<sup>22</sup> In contrast, in the studies of epoprostenol,<sup>24–26</sup> the percentage of patients in  
41  
42 WHO-FC IV was higher than that in studies of other agents. In the studies of iloprost, most  
43  
44 patients were in WHO-FC III.<sup>28 29</sup> In the studies of treprostinil, most patients were in  
45  
46 WHO-FC III in 3 studies<sup>30 32 33</sup> and in WHO-FC II in 1 study.<sup>31</sup> Baseline 6MWD was  
47  
48 226.6–434.5 m, and it was lower in the 3 studies of epoprostenol (226.6, 294.3, and  
49  
50 255.9 m)<sup>24–26</sup> compared with in studies on other agents. Therefore patients with more severe  
51  
52  
53  
54  
55  
56  
57  
58  
59  
60 disease were included in the studies of epoprostenol than in other studies. One study of

1  
2  
3 bosentan included only patients with Eisenmenger syndrome.<sup>21</sup>  
4  
5  
6  
7

### 8 *Background of the subgroup of CTD-PAH patients*

9

10 The background of patients with CTD-PAH, using data from 9 studies, can be summarised as  
11 follows (full data in supplementary table 2). Mean age was 45–55 years, and the percentage  
12 of women was 74–95%. In 1 study of tadalafil, there was no information on baseline 6MWD  
13 or WHO-FC.<sup>18</sup> As for the distribution of patients according to WHO-FC, a study of beraprost  
14 included more patients in WHO-FC II,<sup>39</sup> and a study of epoprostenol included more patients  
15 in WHO-FC IV,<sup>26</sup> compared with studies of other agents.  
16  
17  
18  
19  
20  
21  
22  
23

24  
25 In 5 studies in which information on underlying CTDs was available, SSc-PAH patients  
26 accounted for 45–100% of all patients included. Their mean age was 51–55 years, and the  
27 percentage of women was 74–90%.  
28  
29  
30  
31

32 In studies of bosentan<sup>36</sup> and epoprostenol<sup>26</sup> that included only SSc-PAH patients, baseline  
33 6MWD was < 300 m, which was lower than that in studies of other agents. Therefore the  
34 study of beraprost included more patients with relatively mild PAH, whereas the study of  
35 epoprostenol included more patients with more severe disease.  
36  
37  
38  
39  
40  
41  
42  
43  
44

### 45 *Results of 6MWD*

46

47 We pooled the data, including those for non-approved doses, to evaluate the effect of each  
48 PAH agent on exercise capacity in patients with CTD-PAH compared with in patients with all  
49 forms of PAH.  
50  
51  
52  
53  
54  
55

### 56 *6MWD in All PAH patients*

57  
58  
59  
60

1  
2  
3  
4 The mean differences between changes in 6MWD compared with the control group are  
5  
6 shown in figure 2 by each agent. Briefly, the mean difference between changes in 6MWD  
7  
8 (95%CI) was 45.5 m (32.9, 58.1 m) for sildenafil, 22.4 m (14.0, 30.9 m) for tadalafil, 39.5 m  
9  
10 (19.5, 59.6 m) for bosentan, 44.2 m (30.2, 58.2 m) for ambrisentan, 64.9 m (20.4, 109.4 m)  
11  
12 for epoprostenol, 25.1 m (1.9, 48.4 m) for beraprost, 12.4 m (-21.9, 46.6 m) for iloprost, and  
13  
14 17.3 m (6.1, 28.4 m) for treprostinil. Numerical improvement in 6MWD was obtained in  
15  
16 patients using each agent compared with those using the control agent. Mean difference  
17  
18 between changes in 6MWD from the control group was 12.4–64.9 m, and the total mean  
19  
20 difference (95%CI) combining data for all agents was 34.6 m (27.4, 41.9 m). Mean difference  
21  
22 from the effects of placebo by subgroup of patients receiving PDE-5 inhibitors, ERAs, and  
23  
24 PGI<sub>2</sub> analogues were 22.4–45.5 m, 39.5–44.2 m, and 12.4–64.9 m, respectively.  
25  
26  
27  
28  
29  
30  
31

### 32 *6MWD in a subgroup of CTD-PAH patients*

33  
34  
35 In the subgroup of CTD-PAH patients, the mean differences between changes in 6MWD  
36  
37 compared with the control group are shown in figure 3 by each agent. For single-arm studies,  
38  
39 the mean changes from baseline are shown. Briefly, the mean difference between changes in  
40  
41 6MWD (95%CI) was 47.1 m (27.9, 66.3 m) for sildenafil, 37.0 m (19.0, 55.0 m) for tadalafil,  
42  
43 14.1 m (-4.4, 32.6 m) for bosentan, 21.7 m (2.2, 41.3 m) for ambrisentan, 108.0 m (45.6,  
44  
45 170.4 m) for epoprostenol, 58.5 m (21.4, 95.6 m) for beraprost, and 21.0 m (-6.9, 48.9 m) for  
46  
47 treprostinil. Numerical improvement in 6MWD was obtained in patients using all agents  
48  
49 compared with those using the control agent. The mean difference between changes in  
50  
51 6MWD (95%CI) in patients with CTD-PAH was 34.2 m (23.3, 45.0 m). The mean  
52  
53 differences by subgroup of patients receiving PDE-5 inhibitors, ERAs, and PGI<sub>2</sub> analogues  
54  
55  
56  
57  
58  
59  
60

1  
2  
3 were 37.0–47.1 m, 14.1–21.7 m, and 21.0–108.0 m, respectively.  
4  
5  
6  
7

8  
9 *Difference in exercise capacity between all PAH patients and CTD-PAH patients*

10 When the mean differences between changes in 6MWD were compared between all PAH  
11 patients and each subgroup of CTD-PAH patients, no difference in exercise capacity was  
12 found between the patient groups for PDE-5 inhibitors (sildenafil and tadalafil). In contrast,  
13 for ERAs (bosentan and ambrisentan), the mean values in CTD-PAH patients (bosentan,  
14 14.1 m; ambrisentan, 21.7 m) were lower than the lower limit of 95%CI of the mean values  
15 in all PAH patients (bosentan, 19.5, 59.6 m; ambrisentan, 30.2, 58.2 m), suggesting that  
16 effects on exercise capacity may vary between patient groups. For PGI<sub>2</sub> (epoprostenol,  
17 beraprost, and treprostinil), no obvious trends were found between patient groups.  
18  
19  
20  
21  
22  
23  
24  
25  
26  
27  
28  
29  
30  
31

32  
33 *Risk of bias*

34 We rated risk of bias for each study (full data in supplementary table 3). In studies for all  
35 forms of PAH, none were at high risk of bias for random sequence generation or allocation  
36 concealment; however, the method of randomisation and allocation concealment were  
37 unclear (i.e. not reported) for 11 studies and 9 studies, respectively. Four studies were at high  
38 risk of bias for blinding because they were open-label studies. Three studies were at high risk  
39 for another source of bias (imbalance in missing data between groups,<sup>17</sup> imbalance in  
40 baseline 6MWD,<sup>25</sup> and early termination based on futility analysis<sup>29</sup>).  
41  
42  
43  
44  
45  
46  
47  
48  
49  
50  
51

52 Of studies for CTD-PAH, 3 studies were at high risk of bias with respect to all domains  
53 because they were open-label, single-arm studies.<sup>36 38 39</sup> One study was at high risk of bias  
54 resulting from imbalance in baseline characteristics.<sup>35</sup> The remaining studies were judged to  
55  
56  
57  
58  
59  
60

1  
2  
3  
4 be not of high risk of bias in any of the domains.  
5  
6  
7

## 8 9 **Discussion**

10  
11  
12  
13 A finding of the present meta-analysis of 19 studies is that in combined patients with all  
14 forms of PAH, all agents increase 6MWD compared with the control group.<sup>15-33</sup> Likewise,  
15 the meta-analysis of 9 studies on CTD-PAH patients also showed an increase in 6MWD by  
16 all agents.<sup>18 26 34-40</sup> The finding that all agents increase 6MWD in all PAH patients is  
17 consistent with the results of the 5 previous systematic reviews and meta-analyses that  
18 evaluated the 3 types of agent (PDE-5 inhibitors, ERAs, and PGI<sub>2</sub> analogues).<sup>9-13</sup> To date,  
19 reports of meta-analyses that included patients with CTD-PAH including SSc-PAH are  
20 limited to 1 study that evaluated 3 oral agents (sildenafil, bosentan, and sitaxsentan) alone.<sup>8</sup>  
21 The findings of this meta-analysis are important because patients with all PAH as well as a  
22 subgroup of CTD-PAH patients were included, and the effects of 3 types of agent, including  
23 intravenous preparations, were thoroughly evaluated. Our meta-analysis shows similar trends  
24 to the findings of Avouac *et al.*<sup>8</sup>  
25  
26  
27  
28  
29  
30  
31  
32  
33  
34  
35  
36  
37  
38  
39  
40  
41

42 When the mean differences between changes in 6MWD were compared between all PAH  
43 patients and CTD-PAH patients, the effects of ERAs (bosentan and ambrisentan) on exercise  
44 tolerance may be less in CTD-PAH patients, whereas no difference in exercise capacity was  
45 found between patient groups for PDE-5 inhibitors and PGI<sub>2</sub> analogues. This result should be  
46 interpreted cautiously because recent data from registries have shown that 6MWD is  
47 significantly lower in patients with CTD-PAH than in those with idiopathic PAH,<sup>4 41</sup> and a  
48 systematic review has shown that 6MWD may be only partially valid in patients with  
49  
50  
51  
52  
53  
54  
55  
56  
57  
58  
59  
60

SSc-PAH.<sup>42</sup>

This analysis has several limitations. First, we could identify only a limited number of studies for some agents (1 study each for tadalafil, ambrisentan, and beraprost), and studies that included a subgroup of patients with CTD-PAH including SSc-PAH were scarce. Second, ideally data for patients with CTD-PAH should be compared with those for patients with other forms of PAH. However, there were insufficient data for forms of PAH other than CTD-PAH, so this analysis compared data for all PAH and CTD-PAH. Third, the study designs varied: some studies that included CTD-PAH patients were done in an open-label or single-arm, open-label manner, some having a short observation period (12 or 16 weeks) or using combination therapy. Of note, in studies of combination therapy, changes in 6MWD are expected to be smaller, because patients are already receiving PAH therapy at the start of the study. Patient background characteristics were also inconsistent between studies: patients were in various WHO FC classes and had various baseline 6MWD values, which can influence the effects of each agent, and some articles reported no such information. Moreover, the percentage of SSc-PAH patients in the study population also varied, which is a study limitation because there is a difference in treatment response between SSc and non-SSc patients, and patients with SSc-PAH have poor prognosis compared with patients with other CTD-PAH.<sup>47</sup> In this meta-analysis, the percentages of SSc-PAH patients were as follows: for sildenafil, 45% in the study by Badesch *et al.*;<sup>34</sup> for bosentan, 79% in the study by Denton *et al.*;<sup>35</sup> and 100% in the study by Launay *et al.*;<sup>36</sup> and for epoprostenol, 100% in the study by Badesch *et al.*<sup>26</sup> The percentage was unknown in the study of tadalafil by Galiè *et al.*;<sup>18</sup> in those of ambrisentan by Badesch *et al.*;<sup>37 38</sup> and in that of beraprost by Kunieda *et al.*<sup>39</sup> Patients with SSc-PAH were more frequently enrolled in studies for bosentan<sup>35 36</sup> than in the



1  
2  
3 sildenafil study.<sup>34</sup> A fourth limitation of our study was the inclusion of data for non-approved,  
4 possibly subtherapeutic doses, which may have reduced the effects of the PAH agents in  
5  
6 some studies. Finally, there may be publication bias, so negative results are likely to be  
7  
8 unpublished.<sup>43</sup>  
9  
10

11  
12  
13 Furthermore, the present analysis is intended to compare changes in 6MWD over a short  
14 period of time, therefore whether the results are associated with patient survival remains  
15 unclear. However, 6MWD is effective as an indicator of the severity of PAH.<sup>44</sup> Moreover, an  
16 ongoing large-scale registry, the US Registry to Evaluate Early and Long-Term PAH Disease  
17 Management (REVEAL), which aims to clarify the characteristics and prognosis of PAH  
18 patients and the latest treatment for PAH, has shown that 6MWD is an independent predictor  
19 that is significantly associated with 1-year survival.<sup>45</sup> Several other studies have also  
20 confirmed its role as an independent predictor of prognosis.<sup>46-50</sup> In addition, investigators  
21 who did a placebo-controlled randomised trial of the PDE-5 inhibitor sildenafil have recently  
22 identified the minimum clinically meaningful changes in 6MWD, and concluded that it  
23 would be a useful indicator to determine the efficacy of other PAH agents.<sup>51</sup>  
24  
25  
26  
27  
28  
29  
30  
31  
32  
33  
34  
35  
36  
37  
38  
39

40 However, pharmacological treatment for PAH is shifting from monotherapy to  
41 combination therapy, and it is expected that clinical studies investigating the efficacy of  
42 combination therapy will increase. Therefore, it will be increasingly difficult to do a  
43 meta-analysis that includes all the new studies to detect differences between PAH agents. The  
44 present analysis is meaningful because it included all available clinical study results to date,  
45 and we hope that it contributes to the improvement of the treatment for PAH.  
46  
47  
48  
49  
50  
51  
52  
53

54 In conclusion, the present meta-analysis of studies that included CTD-PAH patients  
55 showed an increase in 6MWD by all agents, that is, PDE-5 inhibitors, ERAs, and PGI<sub>2</sub>  
56  
57  
58  
59  
60

1  
2  
3 analogues. Comparison of the mean differences between changes in 6MWD suggest that, for  
4  
5 bosentan and ambrisentan, the effects on exercise tolerance may differ depending on patient  
6  
7 group, whereas the PDE-5 inhibitors sildenafil and tadalafil and the PGI<sub>2</sub> analogue  
8  
9  
10 epoprostenol show consistent effects regardless of the presence or absence of CTD. Further  
11  
12 studies are needed to clarify the clinical implications of these findings.  
13  
14  
15

### 16 17 18 **Competing interests** 19

20  
21  
22 MK has received research funding from Actelion Pharmaceuticals, GlaxoSmithKline,  
23  
24 Novartis and Pfizer, and lecture fees from Actelion Pharmaceuticals, Pfizer,  
25  
26 GlaxoSmithKline, Nippon Shinyaku, Mitsubishi Tanabe Pharma and Takeda Pharmaceuticals.  
27  
28 WH has received research funding from the Ministry of Health, Labour and Welfare of Japan,  
29  
30 Teika Seiyaku, Takeda Pharmaceuticals, Mochida, Pfizer, Asteras and Daiichi Sankyo, and  
31  
32 lecture fees from Pfizer, Actelion, Novartis, Daiich Sankyo, GlaxoSmithKline and Nihon  
33  
34 Shinyaku. NM and NS are employees of Pfizer Japan Inc.  
35  
36  
37  
38  
39  
40  
41

### 42 **Contributors** 43 44 45

46  
47 N. Matsuoka, a statistician employed by Pfizer Japan, collected the data and did the statistical  
48  
49 analyses described in this article.  
50

51  
52 Dr N. Sugiyama, a rheumatologist employed by Pfizer Japan, reviewed the collection and  
53  
54 analyses of the data. He helped conceive and design the meta-analysis, interpret the results,  
55  
56 and revise the manuscript.  
57  
58  
59  
60

1  
2  
3  
4 Dr M. Kuwana is directly responsible for the manuscript. He reviewed the data analyses and  
5  
6 drafted the manuscript, providing important intellectual content from the perspective of a  
7  
8 CTD-PAH specialist.  
9

10  
11 Dr H. Watanabe revised the manuscript critically for important intellectual content from the  
12  
13 perspective of a PAH specialist.  
14

#### 15 16 17 18 **Data sharing** 19

20 No additional data available.  
21  
22  
23

#### 24 25 **Funding** 26

27 None  
28  
29  
30  
31  
32  
33  
34  
35  
36  
37  
38  
39  
40  
41  
42  
43  
44  
45  
46  
47  
48  
49  
50  
51  
52  
53  
54  
55  
56  
57  
58  
59  
60

## References

1. Badesch DB, Champion HC, Sanchez MA, *et al.* Diagnosis and assessment of pulmonary arterial hypertension. *J Am Coll Cardiol* 2009;54:S55–66.
2. Simonneau G, Robbins IM, Beghetti M, *et al.* Updated clinical classification of pulmonary hypertension. *J Am Coll Cardiol* 2009;54:S43–54.
3. Condliffe R, Kiely DG, Peacock AJ, *et al.* Connective tissue disease-associated pulmonary hypertension in the modern treatment era. *Am J Respir Crit Care Med* 2009;179:151–7.
4. Chung L, Liu J, Parsons L, *et al.* Characterization of connective tissue disease-associated pulmonary arterial hypertension from REVEAL: identifying systemic sclerosis as a unique phenotype. *Chest* 2010;138:1383–94.
5. Hachulla E, Gressin V, Guilevin L, *et al.* Early detection of pulmonary arterial hypertension in systemic sclerosis: a French nationwide prospective multicenter study. *Arthritis Rheum* 2005;52:3792–800.
6. Mukerjee D, St George D, Coleiro B, *et al.* Prevalence and outcome in systemic sclerosis associated pulmonary arterial hypertension: application of a registry approach. *Ann Rheum Dis* 2003;62:1088–93.
7. Kawut SM, Taichman DB, Archer-Chicko CL, *et al.* Hemodynamics and survival in patients with pulmonary arterial hypertension related to systemic sclerosis. *Chest* 2003;123:344–50.
8. Avouac J, Wipff J, Kahan A, *et al.* Effects of oral treatments on exercise capacity in systemic sclerosis related pulmonary arterial hypertension: a meta-analysis of

- 1  
2  
3  
4 randomised controlled trials. *Ann Rheum Dis* 2008;67:808–14.
- 5  
6 9. Galiè N, Manes A, Negro L, *et al*. A meta-analysis of randomized controlled trials in  
7  
8 pulmonary arterial hypertension. *Eur Heart J* 2009;30:394–403.
- 9  
10  
11 10. Galiè N, Palazzini M, Manes A. Pulmonary arterial hypertension: from the kingdom of  
12  
13 the near-dead to multiple clinical trial meta-analyses. *Eur Heart J* 2010;31:2080–6.
- 14  
15  
16 11. Macchia A, Marchioli R, Tognoni G, *et al*. Systematic review of trials using vasodilators  
17  
18 in pulmonary arterial hypertension: why a new approach is needed. *Am Heart J*  
19  
20 2010;159:245–57.
- 21  
22  
23 12. He B, Zhang F, Li X, *et al*. Meta-analysis of randomized controlled trials on treatment of  
24  
25 pulmonary arterial hypertension. *Circ J* 2010;74:1458–64.
- 26  
27  
28 13. Ryerson CJ, Nayar S, Swiston JR, *et al*. Pharmacotherapy in pulmonary arterial  
29  
30 hypertension: a systematic review and meta-analysis. *Respir Res* 2010;11:12.
- 31  
32  
33 14. McLaughlin VV, Badesch DB, Delcroix M, *et al*. End points and clinical trial design in  
34  
35 pulmonary arterial hypertension. *J Am Coll Cardiol* 2009;54:S97–107.
- 36  
37  
38 15. Galiè N, Ghofrani HA, Torbicki A, *et al*. Sildenafil citrate therapy for pulmonary arterial  
39  
40 hypertension. *N Engl J Med* 2005;353:2148–57.
- 41  
42  
43 16. Singh TP, Rohit M, Grover A, *et al*. A randomized, placebo-controlled, double-blind,  
44  
45 crossover study to evaluate the efficacy of oral sildenafil therapy in severe pulmonary  
46  
47 artery hypertension. *Am Heart J* 2006;151:851.e1–5.
- 48  
49  
50 17. Simonneau G, Rubin LJ, Galiè N, *et al*. Addition of sildenafil to long-term intravenous  
51  
52 epoprostenol therapy in patients with pulmonary arterial hypertension: a randomized trial.  
53  
54  
55 *Ann Intern Med* 2008;149:521–30.
- 56  
57 18. Galiè N, Brundage BH, Ghofrani HA, *et al*. Tadalafil therapy for pulmonary arterial  
58  
59  
60

- 1  
2  
3  
4 hypertension. *Circulation* 2009;119:2894–903.
- 5  
6 19. Channick RN, Simonneau G, Sitbon O, *et al.* Effects of the dual endothelin-receptor  
7  
8 antagonist bosentan in patients with pulmonary hypertension: a randomised placebo-  
9  
10 controlled study. *Lancet* 2001;358:1119–23.
- 11  
12  
13 20. Rubin LJ, Badesch DB, Barst RJ, *et al.* Bosentan therapy for pulmonary arterial  
14  
15 hypertension. *N Engl J Med* 2002;346:896–903.
- 16  
17  
18 21. Galiè N, Beghetti M, Gatzoulis MA, *et al.* Bosentan therapy in patients with  
19  
20 Eisenmenger syndrome: a multicenter, double-blind, randomized, placebo-controlled  
21  
22 study. *Circulation* 2006;114:48–54.
- 23  
24  
25 22. Galiè N, Rubin LJ, Hoeper M, *et al.* Treatment of patients with mildly symptomatic  
26  
27 pulmonary arterial hypertension with bosentan (EARLY study): a double-blind,  
28  
29 randomised controlled trial. *Lancet* 2008;371:2093–100.
- 30  
31  
32 23. Galiè N, Olschewski H, Oudiz RJ, *et al.* Ambrisentan for the treatment of pulmonary  
33  
34 arterial hypertension: results of the ambrisentan in pulmonary arterial hypertension,  
35  
36 randomized, double-blind, placebo-controlled, multicenter, efficacy (ARIES) study 1 and  
37  
38 2. *Circulation* 2008;117:3010–9.
- 39  
40  
41  
42 24. Rubin LJ, Mendoza J, Hood M, *et al.* Treatment of primary pulmonary hypertension with  
43  
44 continuous intravenous prostacyclin (epoprostenol). Results of a randomized trial. *Ann*  
45  
46 *Intern Med* 1990;112:485–91.
- 47  
48  
49 25. Barst RJ, Rubin LJ, Long WA, *et al.* A comparison of continuous intravenous  
50  
51 epoprostenol (prostacyclin) with conventional therapy for primary pulmonary  
52  
53 hypertension. The Primary Pulmonary Hypertension Study Group. *N Engl J Med*  
54  
55 1996;334:296–302.
- 56  
57  
58  
59  
60

- 1  
2  
3  
4 26. Badesch DB, Tapson VF, McGoon MD, *et al.* Continuous intravenous epoprostenol for  
5  
6 pulmonary hypertension due to the scleroderma spectrum of disease. A randomized,  
7  
8 controlled trial. *Ann Intern Med* 2000;132:425–34.  
9
- 10  
11 27. Galiè N, Humbert M, Vachiéry JL, *et al.* Effects of beraprost sodium, an oral  
12  
13 prostacyclin analogue, in patients with pulmonary arterial hypertension: a randomized,  
14  
15 double-blind, placebo-controlled trial. *J Am Coll Cardiol* 2002;39:1496–502.  
16
- 17  
18 28. McLaughlin VV, Oudiz RJ, Frost A, *et al.* Randomized study of adding inhaled iloprost  
19  
20 to existing bosentan in pulmonary arterial hypertension. *Am J Respir Crit Care Med*  
21  
22 2006;174:1257–63.  
23
- 24  
25 29. Hoeper MM, Leuchte H, Halank M, *et al.* Combining inhaled iloprost with bosentan in  
26  
27 patients with idiopathic pulmonary arterial hypertension. *Eur Respir J* 2006;28:691–4.  
28
- 29  
30 30. Simonneau G, Barst RJ, Galiè N, *et al.* Continuous subcutaneous infusion of treprostinil,  
31  
32 a prostacyclin analogue, in patients with pulmonary arterial hypertension: a double-blind,  
33  
34 randomized, placebo-controlled trial. *Am J Respir Crit Care Med* 2002;165:800–4.  
35
- 36  
37 31. McLaughlin VV, Gaine SP, Barst RJ, *et al.* Efficacy and safety of treprostinil: an  
38  
39 epoprostenol analog for primary pulmonary hypertension. *J Cardiovasc Pharmacol*  
40  
41 2003;41:293–9.  
42
- 43  
44 32. McLaughlin VV, Benza RL, Rubin LJ, *et al.* Addition of inhaled treprostinil to oral  
45  
46 therapy for pulmonary arterial hypertension. *J Am Coll Cardiol* 2010;55:1915–22.  
47
- 48  
49 33. Hiremath J, Thanikachalam S, Parikh K, *et al.* Exercise improvement and plasma  
50  
51 biomarker changes with intravenous treprostinil therapy for pulmonary arterial  
52  
53 hypertension: a placebo-controlled trial. *J Heart Lung Transplant* 2010;29:137–49.  
54
- 55  
56 34. Badesch DB, Hill NS, Burgess G, *et al.* Sildenafil for pulmonary arterial hypertension  
57  
58

- 1  
2  
3 associated with connective tissue disease. *J Rheumatol* 2007;34:2417–22.  
4  
5  
6 35. Denton CP, Humbert M, Rubin L, *et al.* Bosentan treatment for pulmonary arterial  
7  
8 hypertension related to connective tissue disease: a subgroup analysis of the pivotal  
9  
10 clinical trials and their open-label extensions. *Ann Rheum Dis* 2006;65:1336–40.  
11  
12  
13 36. Launay D, Sitbon O, Le Pavec J, *et al.* Long-term outcome of systemic  
14  
15 sclerosis-associated pulmonary arterial hypertension treated with bosentan as first-line  
16  
17 monotherapy followed or not by the addition of prostanoids or sildenafil. *Rheumatology*  
18  
19 2010;49:490–500.  
20  
21  
22 37. Badesch DB. Ambrisentan therapy for pulmonary arterial hypertension: a comparison by  
23  
24 PAH etiology. *Chest* 2007;slide presentations:488S.  
25  
26  
27 38. Badesch DB, Feldman J, Keogh A, *et al.* ARIES-3: ambrisentan therapy in a diverse  
28  
29 population of patients with pulmonary hypertension. *Cardiovasc Ther* 2012;30:93–9.  
30  
31  
32 39. Kunieda T, Nakanishi N, Matsubara H, *et al.* Effects of long-acting beraprost sodium  
33  
34 (TRK-100STP) in Japanese patients with pulmonary arterial hypertension. *Int Heart J*  
35  
36 2009;50:513–29.  
37  
38  
39 40. Oudiz R, Schilz RJ, Barst RJ, *et al.* Treprostinil, a prostacyclin analogue, in pulmonary  
40  
41 arterial hypertension associated with connective tissue disease. *Chest* 2004;126:420–7.  
42  
43  
44 41. Clements PJ, Tan M, McLaughlin VV, *et al.* The pulmonary arterial hypertension quality  
45  
46 enhancement research initiative: comparison of patients with idiopathic PAH to patients  
47  
48 with systemic sclerosis-associated PAH. *Ann Rheum Dis* 2012;71:249–52.  
49  
50  
51 42. Avouac J, Kowal-Bielecka O, Pittrow D, *et al.*; EPOSS Group. Validation of the 6 min  
52  
53 walk test according to the OMERACT filter: a systematic literature review by the  
54  
55 EPOSS-OMERACT group. *Ann Rheum Dis* 2010; 69:1360–1363.  
56  
57  
58  
59  
60



- 1  
2  
3  
4 43. Ahmed I, Sutton AJ, Riley RD. Assessment of publication bias, selection bias, and  
5  
6 unavailable data in meta-analyses using individual participant data: a database survey.  
7  
8 *BMJ* 2012;344:d7762.  
9
- 10  
11 44. Naeije R. The 6-min walk distance in pulmonary arterial hypertension: "Je t'aime, moi  
12  
13 non plus". *Chest* 2010;137:1258–60.  
14
- 15  
16 45. Benza RL, Miller DP, Gomberg-Maitland M, *et al.* Predicting survival in pulmonary  
17  
18 arterial hypertension: insights from the Registry to Evaluate Early and Long-Term  
19  
20 Pulmonary Arterial Hypertension Disease Management (REVEAL). *Circulation*  
21  
22 2010;122:164–72.  
23  
24
- 25  
26 46. Miyamoto S, Nagaya N, Satoh T, *et al.* Clinical correlates and prognostic significance of  
27  
28 six-minute walk test in patients with primary pulmonary hypertension. Comparison with  
29  
30 cardiopulmonary exercise testing. *Am J Respir Crit Care Med* 2000;161:487–92.  
31  
32
- 33  
34 47. Sitbon O, Humbert M, Nunes H, *et al.* Long-term intravenous epoprostenol infusion in  
35  
36 primary pulmonary hypertension: prognostic factors and survival. *J Am Coll Cardiol*  
37  
38 2002;40:780–8.  
39
- 40  
41 48. Groepenhoff H, Vonk-Noordegraaf A, Boonstra A, *et al.* Exercise testing to estimate  
42  
43 survival in pulmonary hypertension. *Med Sci Sports Exerc* 2008;40:1725–32.  
44
- 45  
46 49. Humbert M, Sitbon O, Chaouat A, *et al.* Survival in patients with idiopathic, familial,  
47  
48 and anorexigen-associated pulmonary arterial hypertension in the modern management  
49  
50 era. *Circulation* 2010;122:156–63.  
51
- 52  
53 50. Humbert M, Sitbon O, Yaïci A, *et al.* Survival in incident and prevalent cohorts of  
54  
55 patients with pulmonary arterial hypertension. *Eur Respir J* 2010;36:549–55.  
56
- 57  
58 51. Gilbert C, Brown MC, Cappelleri JC, *et al.* Estimating a minimally important difference  
59  
60

1  
2  
3  
4  
5  
6  
7  
8  
9  
10  
11  
12  
13  
14  
15  
16  
17  
18  
19  
20  
21  
22  
23  
24  
25  
26  
27  
28  
29  
30  
31  
32  
33  
34  
35  
36  
37  
38  
39  
40  
41  
42  
43  
44  
45  
46  
47  
48  
49  
50  
51  
52  
53  
54  
55  
56  
57  
58  
59  
60

in pulmonary arterial hypertension following treatment with sildenafil. *Chest*  
2009;135:137–42.

For peer review only

## Figure legends

**Figure 1** Flow diagram summarising selection of studies evaluating treatments for patients with (a) all forms of pulmonary arterial hypertension (PAH) and (b) connective tissue disease-PAH. RCT, randomised controlled trial.

**Figure 2** Effects of individual pulmonary arterial hypertension (PAH) agents on 6-minute walk distance (6MWD) in patients with any form of PAH. ERA, endothelin receptor antagonist; PDE, phosphodiesterase; PGI<sub>2</sub>, prostacyclin.

**Figure 3** Effects of individual pulmonary arterial hypertension (PAH) agents on 6-minute walk distance (6MWD) in patients with PAH associated with connective tissue disease. ERA, endothelin receptor antagonist; PDE, phosphodiesterase; PGI<sub>2</sub>, prostacyclin. For single-arm studies, the mean changes from baseline are shown.

**Table 1** Summary of included studies evaluating treatment with PAH agents in patients with all forms of PAH

| Source (official acronym)                            | PAH agent  | No. of patients | No. (%) of CTD-PAH patients | Study design | Intervention                                                                                                                    | Control                                           | Period (weeks) | Results for CTD-PAH                                     |
|------------------------------------------------------|------------|-----------------|-----------------------------|--------------|---------------------------------------------------------------------------------------------------------------------------------|---------------------------------------------------|----------------|---------------------------------------------------------|
| Galiè <i>et al.</i> (2005) <sup>15</sup> (SUPER-1)   | Sildenafil | 278             | 84 (30)                     | RCT, DB      | 20 mg × 3/day, 40 mg × 3/day, 80 mg × 3/day                                                                                     | Placebo                                           | 12             | Available in Badesch <i>et al.</i> (2007) <sup>34</sup> |
| Singh <i>et al.</i> (2006) <sup>16</sup>             | Sildenafil | 20              | 0                           | RCT, DB      | 25 mg on first day, then if no hypotension, 100 mg × 3/day                                                                      | Placebo                                           | 6              | None                                                    |
| Simonneau <i>et al.</i> (2008) <sup>17</sup> (PACES) | Sildenafil | 267             | 55 (21)                     | RCT, DB      | 20 mg × 3/day, titrated to 40 mg and 80 mg × 3/day, as tolerated, at 4-week intervals on background treatment with epoprostenol | Placebo on background treatment with epoprostenol | 16             | None                                                    |
| Galiè <i>et al.</i> (2009) <sup>18</sup> (PHIRST)    | Tadalafil  | 405             | 95 (24)                     | RCT, DB      | 2.5 mg, 10 mg, 20 mg, 40 mg                                                                                                     | Placebo                                           | 16             | Available in this article                               |
| Channick <i>et al.</i> (2001) <sup>19</sup>          | Bosentan   | 32              | 5 (16)                      | RCT, DB      | 62.5 mg × 2/day for 4 weeks, then 125 mg × 2/day                                                                                | Placebo                                           | 12             | Available in Denton <i>et al.</i> (2006) <sup>35</sup>  |
| Rubin <i>et al.</i> (2002) <sup>20</sup> (BREATHE-1) | Bosentan   | 213             | 63 (30)                     | RCT, DB      | 62.5 mg × 2/day for 4 weeks, then 125 mg or 250 mg × 2/day                                                                      | Placebo                                           | 16             | Available in Denton <i>et al.</i> (2006) <sup>35</sup>  |
| Galiè <i>et al.</i> (2006) <sup>21</sup>             | Bosentan   | 54              | 0                           | RCT, DB      | 62.5 mg × 2/day for                                                                                                             | Placebo                                           | 16             | None                                                    |

| Source (official acronym)                           | PAH agent    | No. of patients | No. (%) of CTD-PAH patients | Study design    | Intervention                                                                | Control              | Period (weeks) | Results for CTD-PAH                       |
|-----------------------------------------------------|--------------|-----------------|-----------------------------|-----------------|-----------------------------------------------------------------------------|----------------------|----------------|-------------------------------------------|
| (BREATHE-5)                                         |              |                 |                             |                 | 4 weeks, then 125 mg × 2/day                                                |                      |                |                                           |
| Galiè <i>et al.</i> (2008) <sup>22</sup> (EARLY)    | Bosentan     | 185             | 33 (18)                     | RCT, DB         | 62.5 mg × 2/day for 4 weeks, then 125 mg × 2/day                            | Placebo              | 24             | None                                      |
| Galiè <i>et al.</i> (2008) <sup>23</sup> (ARIES)    | Ambrisentan  | 393             | 124 (32)                    | RCT, DB         | 2.5 mg, 5 mg, 10 mg                                                         | Placebo              | 12             | Available in Badesch (2007) <sup>37</sup> |
| Rubin <i>et al.</i> (1990) <sup>24</sup>            | Epoprostenol | 23              | 0                           | RCT, open-label | Initial dosage of 1–2 ng/kg/min, then titrated to an optimal dose           | Conventional therapy | 8              | None                                      |
| Barst <i>et al.</i> (1996) <sup>25</sup>            | Epoprostenol | 81              | 0                           | RCT, open-label | Initial dosage of 2 ng/kg/min, then titrated to optimal dosage              | Conventional therapy | 12             | None                                      |
| Badesch <i>et al.</i> (2000) <sup>26</sup>          | Epoprostenol | 111             | 111 (100)                   | RCT, open-label | Dosage established according to signs and symptoms from an initial low dose | Conventional therapy | 12             | Available in this article                 |
| Galiè <i>et al.</i> (2002) <sup>27</sup> (ALPHABET) | Beraprost    | 130             | 13 (10)                     | RCT, DB         | 20 mg × 4/day for first week, then titrated to 120 mg ×                     | Placebo              | 12             | None                                      |

| Source (official acronym)                            | PAH agent        | No. of patients | No. (%) of CTD-PAH patients | Study design    | Intervention                                                                            | Control                                                        | Period (weeks) | Results for CTD-PAH                                   |
|------------------------------------------------------|------------------|-----------------|-----------------------------|-----------------|-----------------------------------------------------------------------------------------|----------------------------------------------------------------|----------------|-------------------------------------------------------|
| McLaughlin <i>et al.</i> (2006) <sup>28</sup> (STEP) | Inhaled iloprost | 67              | NR                          | RCT, DB         | 4/day<br>5 mg on background treatment with bosentan (125 mg × 2/day)                    | Placebo on background treatment with bosentan (125 mg × 2/day) | 12             | None                                                  |
| Hoeper <i>et al.</i> (2006) <sup>29</sup> (COMBI)    | Inhaled iloprost | 40              | 0                           | RCT, open-label | 5 mg on background treatment with bosentan (125 mg × 2/day)                             | Placebo on background treatment with bosentan (125 mg × 2/day) | 12             | None                                                  |
| Simonneau <i>et al.</i> (2002) <sup>30</sup>         | Treprostinil     | 469             | 90 (19)                     | RCT, DB         | Initial dosage of 1.25 ng/kg/min, then titrated to maximum dosage of 22.5 ng/kg/min     | Placebo                                                        | 12             | None                                                  |
| McLaughlin <i>et al.</i> (2003) <sup>31</sup>        | Treprostinil     | 26              | 0                           | RCT, DB         | Initial dosage of 2.5 or 5.0 ng/kg/min, then titrated to maximum dosage of 20 ng/kg/min | Placebo                                                        | 8              | Available in Oudiz <i>et al.</i> (2004) <sup>40</sup> |
| McLaughlin <i>et al.</i>                             | Treprostinil     | 235             | 0                           | RCT, DB         | Initiated at 3 breaths                                                                  | Placebo                                                        | 12             | None                                                  |

3

| Source (official acronym)                   | PAH agent    | No. of patients | No. (%) of CTD-PAH patients | Study design | Intervention                                                                                          | Control | Period (weeks) | Results for CTD-PAH |
|---------------------------------------------|--------------|-----------------|-----------------------------|--------------|-------------------------------------------------------------------------------------------------------|---------|----------------|---------------------|
| (2010) <sup>32</sup>                        |              |                 |                             |              | (18 mg)/inhalation, then titrated to maximum dosage of 9 breaths (54 mg) at each of the 4 daily doses |         |                |                     |
| Hiremath <i>et al.</i> (2010) <sup>33</sup> | Treprostinil | 44              | 2 (5)                       | RCT, DB      | Initial dose of 4 ng/kg/min, then titrated to maximum dose of 100 ng/kg/min                           | Placebo | 12             | None                |

CTD, connective tissue disease; DB, double-blind; NR, not reported; PAH, pulmonary arterial hypertension; RCT, randomised controlled trial.

**Table 2** Summary of included studies evaluating treatment with PAH agents in patients with CTD-PAH

| Source (official acronym)                            | PAH agent    | No. of CTD-PAH patients | No. (%) of SSc-PAH patients | Study design           | Intervention                                                             | Control              | Period (weeks) |
|------------------------------------------------------|--------------|-------------------------|-----------------------------|------------------------|--------------------------------------------------------------------------|----------------------|----------------|
| Badesch <i>et al.</i> (2007) <sup>34</sup> (SUPER-1) | Sildenafil   | 84                      | 38 (45)                     | RCT, DB                | 20 mg × 3/day, 40 mg × 3/day, 80 mg × 3/day                              | Placebo              | 12             |
| Galiè <i>et al.</i> (2009) <sup>18</sup> (PHIRST)    | Tadalafil    | 95                      | NR                          | RCT, DB                | 2.5 mg, 10 mg, 20 mg, 40 mg                                              | Placebo              | 16             |
| Denton <i>et al.</i> (2006) <sup>35</sup>            | Bosentan     | 66                      | 52 (79)                     | RCT, DB                | 62.5 mg × 2/day for 4 weeks, then 125 or 250 mg × 2/day                  | Placebo              | 12 or 16       |
| Launay <i>et al.</i> (2010) <sup>36</sup>            | Bosentan     | 49                      | 49 (100)                    | Single-arm, open-label | 62.5 mg × 2/day for 4 weeks, then 125 or 250 mg × 2/day                  | None                 | 28             |
| Badesch (2007) <sup>37</sup> (ARIES)                 | Ambrisentan  | 124                     | NR                          | RCT, DB                | 2.5 mg, 5 mg, 10 mg                                                      | Placebo              | 12             |
| Badesch <i>et al.</i> (2012) <sup>38</sup> (ARIES-3) | Ambrisentan  | 40                      | NR                          | Single-arm, open-label | 5 mg                                                                     | None                 | 24             |
| Badesch <i>et al.</i> (2000) <sup>26</sup>           | Epoprostenol | 111                     | 111 (100)                   | RCT, open-label        | Dosage established according to signs and symptoms from initial low dose | Conventional therapy | 12             |
| Kunieda <i>et al.</i> (2009) <sup>39</sup>           | Beraprost    | 19                      | NR                          | Single-arm, open-label | Initial dose of 120 mg/day, then titrated to maximum dose of 360 mg/day  | None                 | 12             |
| Oudiz <i>et al.</i> (2004) <sup>40</sup>             | Treprostinil | 90                      | 45 (50)                     | RCT, DB                | Initial dosage of 2.5 or 5.0 ng/kg/min, then titrated to                 | Placebo              | 8              |



| Source (official acronym) | PAH agent | No. of<br>CTD-PAH<br>patients | No. (%)<br>of<br>SSc-PAH<br>patients | Study design | Intervention                      | Control | Period<br>(weeks) |
|---------------------------|-----------|-------------------------------|--------------------------------------|--------------|-----------------------------------|---------|-------------------|
|                           |           |                               |                                      |              | maximum dosage of<br>20 ng/kg/min |         |                   |

CTD, connective tissue disease; DB, double-blind; NR, not reported; PAH, pulmonary arterial hypertension; RCT, randomised controlled trial; SSc, systemic sclerosis.

Figure 1a

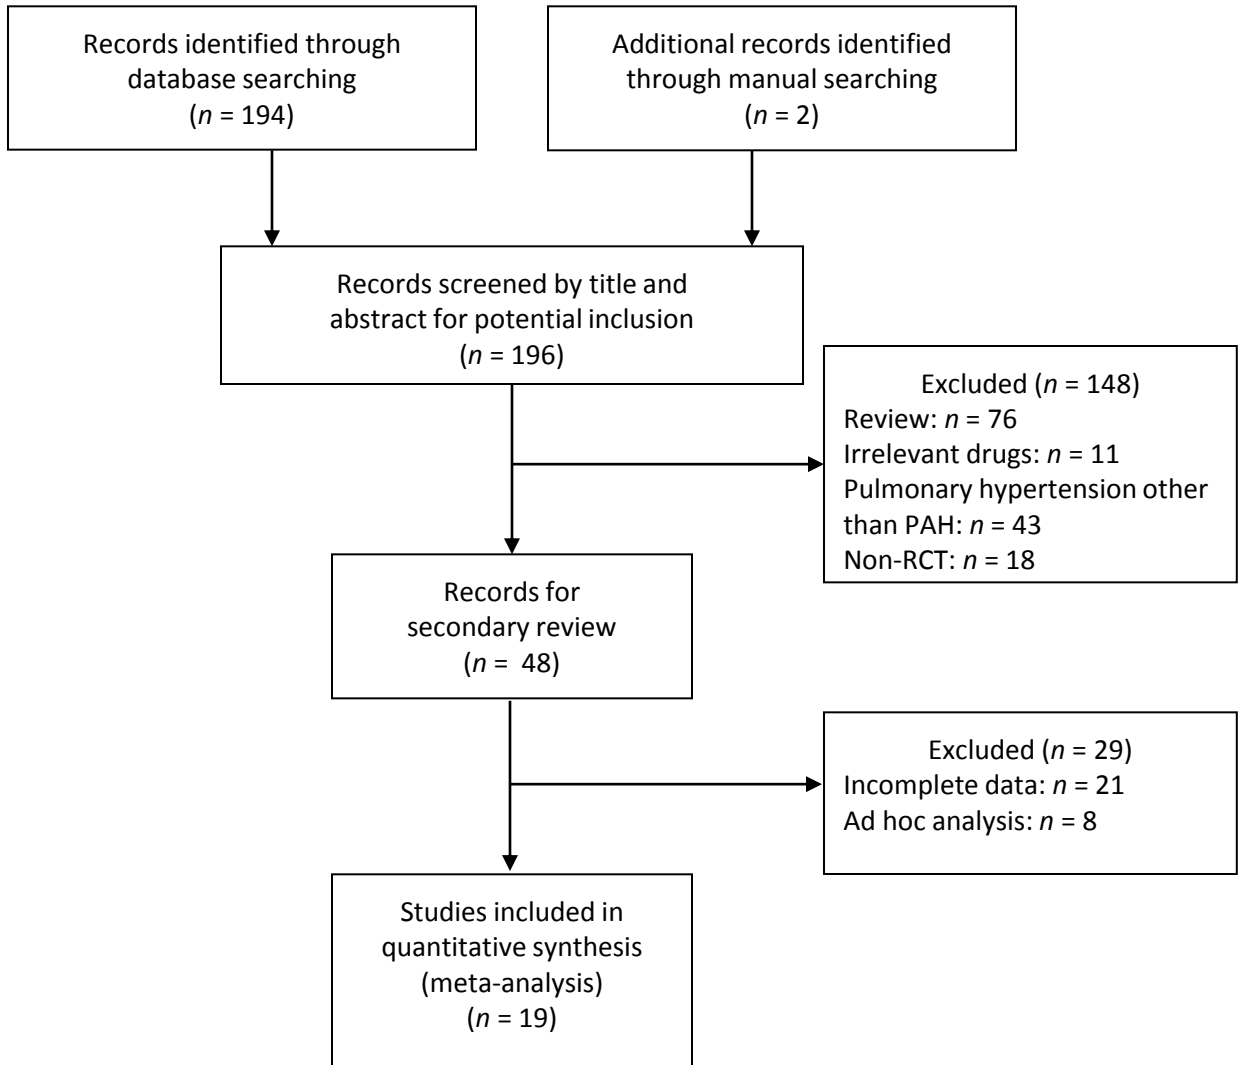

Figure 1b

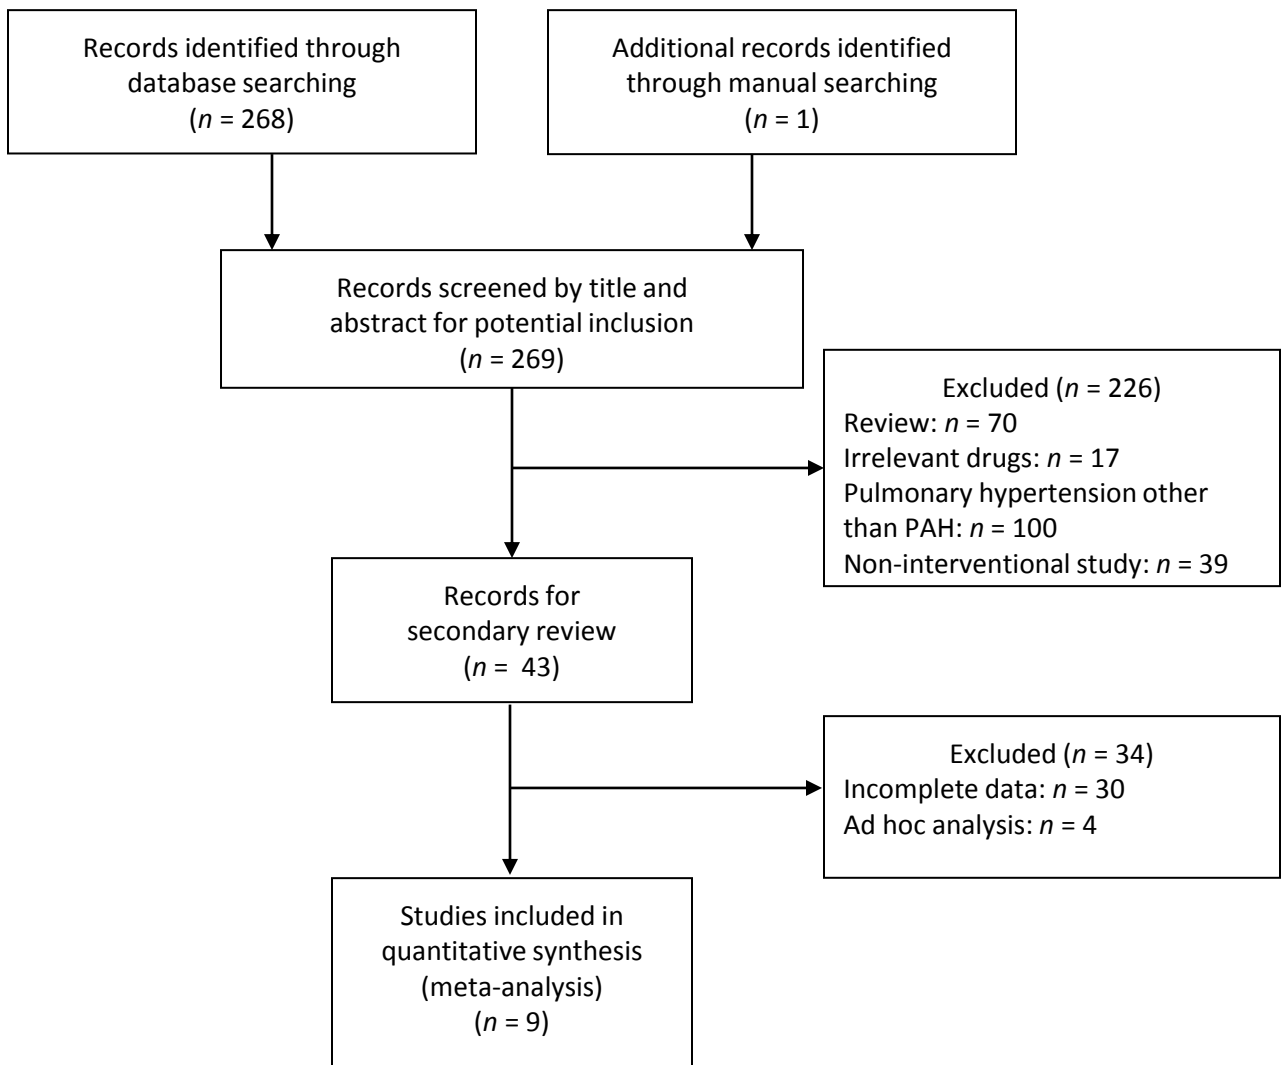

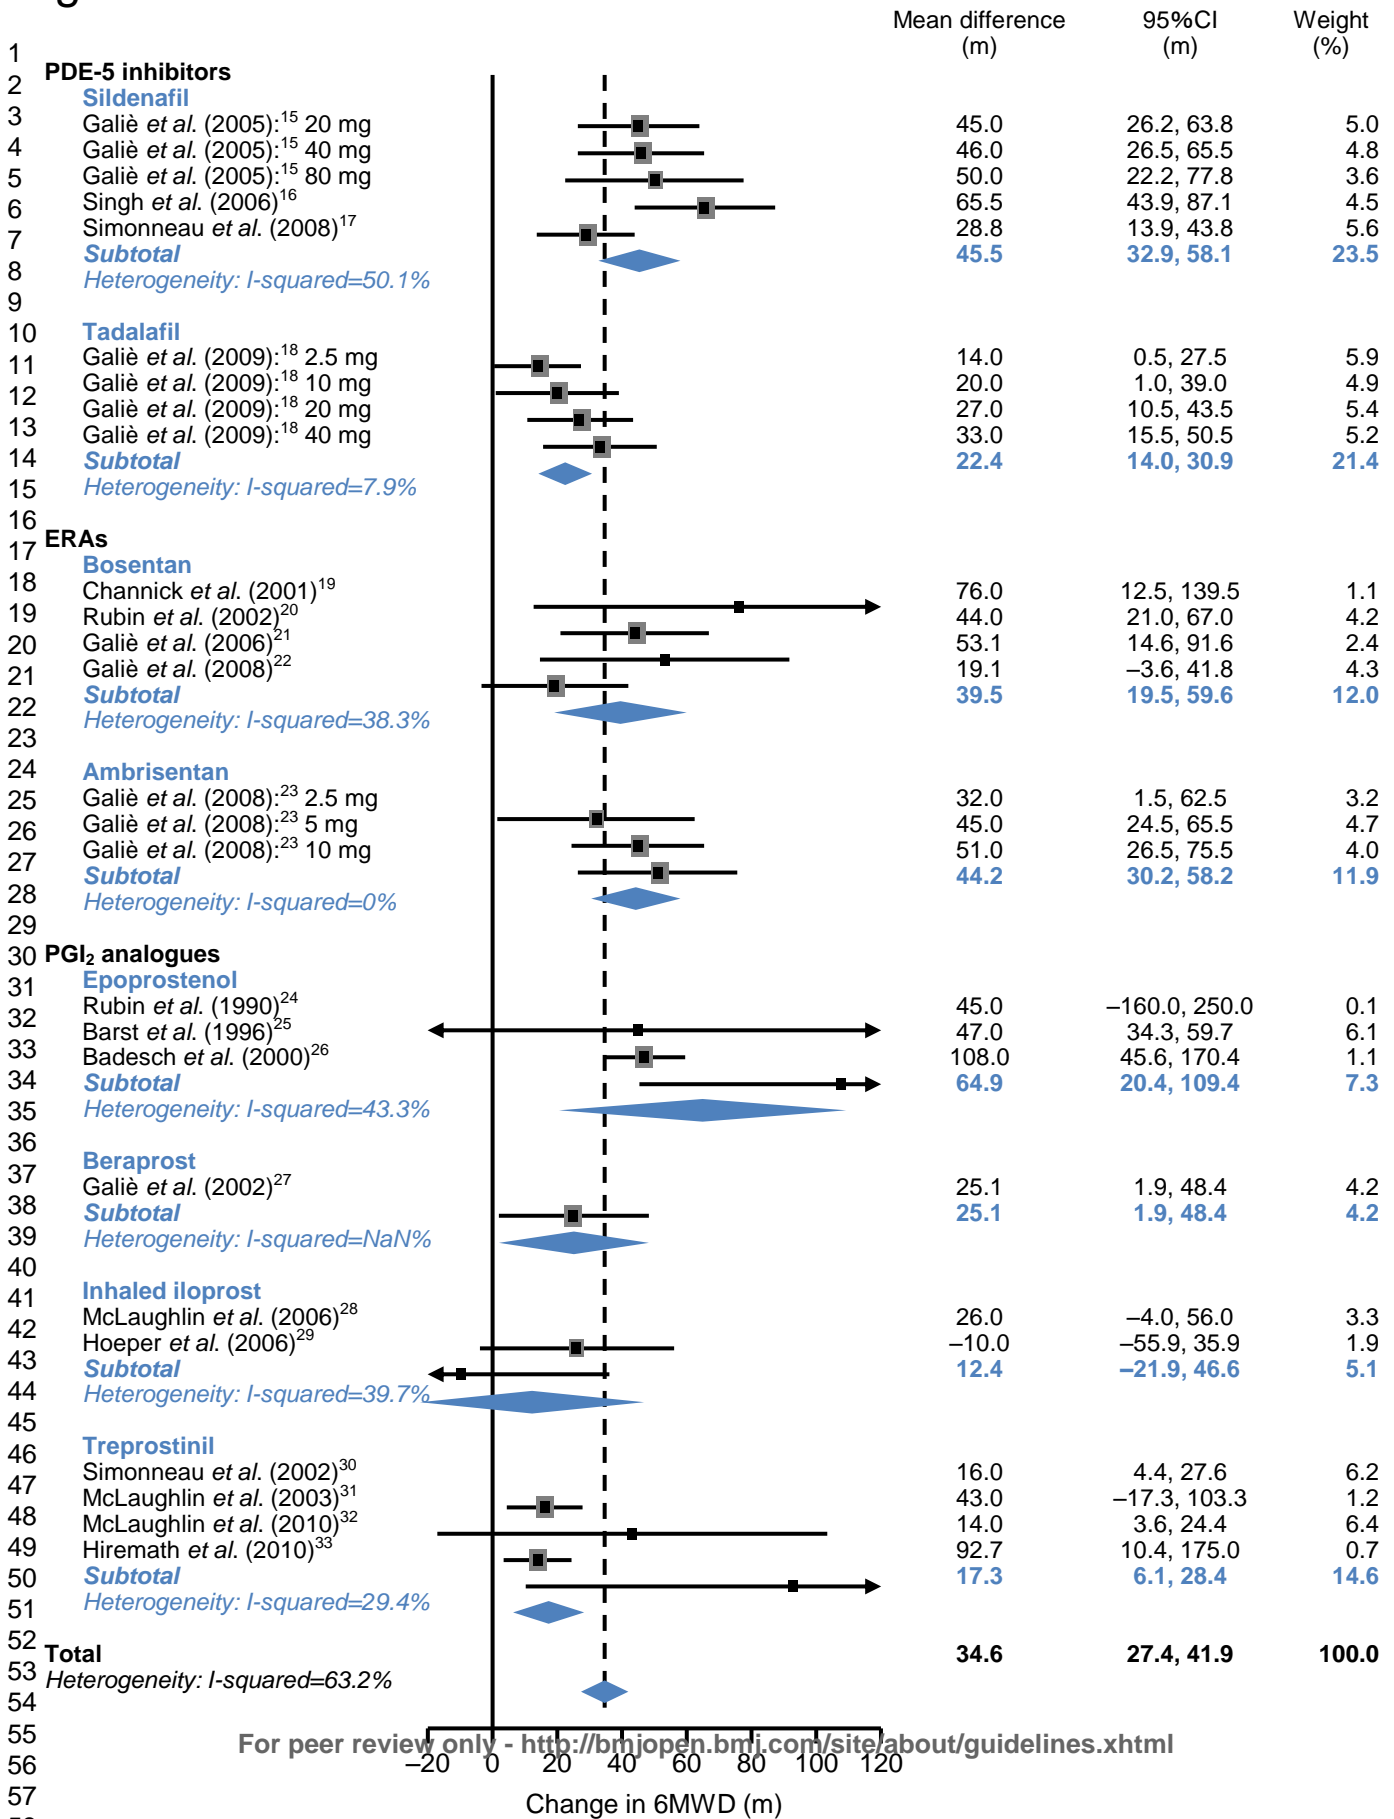

Figure 3

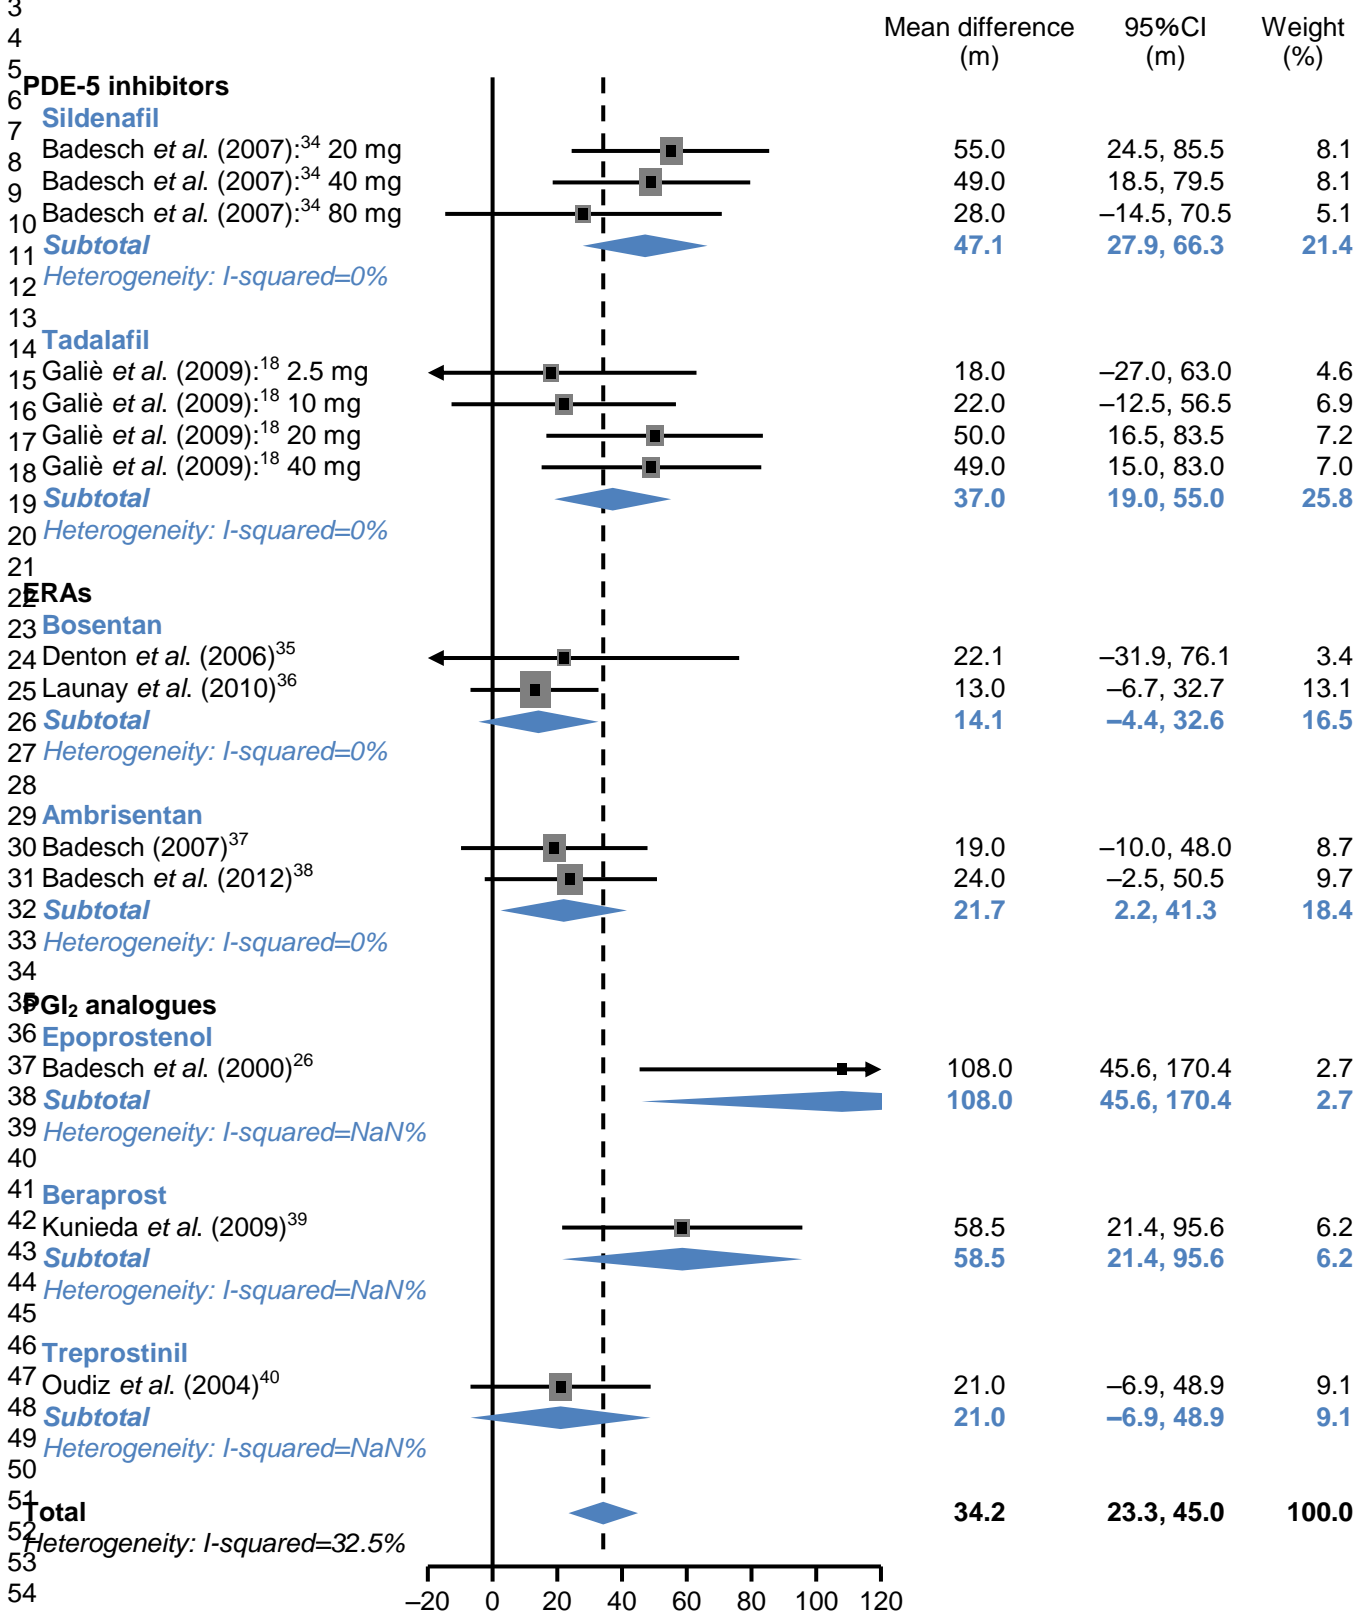

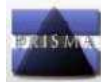

# PRISMA 2009 Checklist

| Section/topic                      | #  | Checklist item                                                                                                                                                                                                                                                                                              | Reported on page # |
|------------------------------------|----|-------------------------------------------------------------------------------------------------------------------------------------------------------------------------------------------------------------------------------------------------------------------------------------------------------------|--------------------|
| <b>TITLE</b>                       |    |                                                                                                                                                                                                                                                                                                             |                    |
| Title                              | 1  | Identify the report as a systematic review, meta-analysis, or both.                                                                                                                                                                                                                                         | 1                  |
| <b>ABSTRACT</b>                    |    |                                                                                                                                                                                                                                                                                                             |                    |
| Structured summary                 | 2  | Provide a structured summary including, as applicable: background; objectives; data sources; study eligibility criteria, participants, and interventions; study appraisal and synthesis methods; results; limitations; conclusions and implications of key findings; systematic review registration number. | 2                  |
| <b>INTRODUCTION</b>                |    |                                                                                                                                                                                                                                                                                                             |                    |
| Rationale                          | 3  | Describe the rationale for the review in the context of what is already known.                                                                                                                                                                                                                              | 5-6                |
| Objectives                         | 4  | Provide an explicit statement of questions being addressed with reference to participants, interventions, comparisons, outcomes, and study design (PICOS).                                                                                                                                                  | 6                  |
| <b>METHODS</b>                     |    |                                                                                                                                                                                                                                                                                                             |                    |
| Protocol and registration          | 5  | Indicate if a review protocol exists, if and where it can be accessed (e.g., Web address), and, if available, provide registration information including registration number.                                                                                                                               | n/a                |
| Eligibility criteria               | 6  | Specify study characteristics (e.g., PICOS, length of follow-up) and report characteristics (e.g., years considered, language, publication status) used as criteria for eligibility, giving rationale.                                                                                                      | 7                  |
| Information sources                | 7  | Describe all information sources (e.g., databases with dates of coverage, contact with study authors to identify additional studies) in the search and date last searched.                                                                                                                                  | 7                  |
| Search                             | 8  | Present full electronic search strategy for at least one database, including any limits used, such that it could be repeated.                                                                                                                                                                               | 7                  |
| Study selection                    | 9  | State the process for selecting studies (i.e., screening, eligibility, included in systematic review, and, if applicable, included in the meta-analysis).                                                                                                                                                   | 7                  |
| Data collection process            | 10 | Describe method of data extraction from reports (e.g., piloted forms, independently, in duplicate) and any processes for obtaining and confirming data from investigators.                                                                                                                                  | 8                  |
| Data items                         | 11 | List and define all variables for which data were sought (e.g., PICOS, funding sources) and any assumptions and simplifications made.                                                                                                                                                                       | 7-8                |
| Risk of bias in individual studies | 12 | Describe methods used for assessing risk of bias of individual studies (including specification of whether this was done at the study or outcome level), and how this information is to be used in any data synthesis.                                                                                      | 8                  |
| Summary measures                   | 13 | State the principal summary measures (e.g., risk ratio, difference in means).                                                                                                                                                                                                                               | 7-8                |
| Synthesis of results               | 14 | Describe the methods of handling data and combining results of studies, if done, including measures of consistency (e.g., $I^2$ ) for each meta-analysis.                                                                                                                                                   | 8                  |

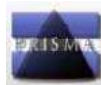

# PRISMA 2009 Checklist

| Section/topic                 | #  | Checklist item                                                                                                                                                                                           | Reported on page #      |
|-------------------------------|----|----------------------------------------------------------------------------------------------------------------------------------------------------------------------------------------------------------|-------------------------|
| Risk of bias across studies   | 15 | Specify any assessment of risk of bias that may affect the cumulative evidence (e.g., publication bias, selective reporting within studies).                                                             | 8                       |
| Additional analyses           | 16 | Describe methods of additional analyses (e.g., sensitivity or subgroup analyses, meta-regression), if done, indicating which were pre-specified.                                                         | n/a                     |
| <b>RESULTS</b>                |    |                                                                                                                                                                                                          |                         |
| Study selection               | 17 | Give numbers of studies screened, assessed for eligibility, and included in the review, with reasons for exclusions at each stage, ideally with a flow diagram.                                          | 8–9 and Fig. 1          |
| Study characteristics         | 18 | For each study, present characteristics for which data were extracted (e.g., study size, PICOS, follow-up period) and provide the citations.                                                             | 9–10 and Tables 1 and 2 |
| Risk of bias within studies   | 19 | Present data on risk of bias of each study and, if available, any outcome level assessment (see item 12).                                                                                                | 13 and Suppl. table 3   |
| Results of individual studies | 20 | For all outcomes considered (benefits or harms), present, for each study: (a) simple summary data for each intervention group (b) effect estimates and confidence intervals, ideally with a forest plot. | 11–13, Figs 2 and 3     |
| Synthesis of results          | 21 | Present results of each meta-analysis done, including confidence intervals and measures of consistency.                                                                                                  | 11–13, Figs 2 and 3     |
| Risk of bias across studies   | 22 | Present results of any assessment of risk of bias across studies (see Item 15).                                                                                                                          | 13 and Suppl. table 3   |
| Additional analysis           | 23 | Give results of additional analyses, if done (e.g., sensitivity or subgroup analyses, meta-regression [see Item 16]).                                                                                    | n/a                     |
| <b>DISCUSSION</b>             |    |                                                                                                                                                                                                          |                         |
| Summary of evidence           | 24 | Summarize the main findings including the strength of evidence for each main outcome; consider their relevance to key groups (e.g., healthcare providers, users, and policy makers).                     | 14                      |
| Limitations                   | 25 | Discuss limitations at study and outcome level (e.g., risk of bias), and at review-level (e.g., incomplete retrieval of identified research, reporting bias).                                            | 15–16                   |
| Conclusions                   | 26 | Provide a general interpretation of the results in the context of other evidence, and implications for future research.                                                                                  | 16-17                   |
| <b>FUNDING</b>                |    |                                                                                                                                                                                                          |                         |

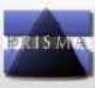

# PRISMA 2009 Checklist

1  
2  
3  
4  
5  
6  
7  
8  
9  
10  
11  
12  
13  
14  
15  
16  
17  
18  
19  
20  
21  
22  
23  
24  
25  
26  
27  
28  
29  
30  
31  
32  
33  
34  
35  
36  
37  
38  
39  
40  
41  
42  
43  
44  
45  
46  
47  
48  
49

|         |    |                                                                                                                                            |    |
|---------|----|--------------------------------------------------------------------------------------------------------------------------------------------|----|
| Funding | 27 | Describe sources of funding for the systematic review and other support (e.g., supply of data); role of funders for the systematic review. | 17 |
|---------|----|--------------------------------------------------------------------------------------------------------------------------------------------|----|

*From:* Moher D, Liberati A, Tetzlaff J, Altman DG, The PRISMA Group (2009). Preferred Reporting Items for Systematic Reviews and Meta-Analyses: The PRISMA Statement. PLoS Med 6(6): e1000097. doi:10.1371/journal.pmed1000097

For more information, visit: [www.prisma-statement.org](http://www.prisma-statement.org).

Page 2 of 2

For peer review only



**Supplementary table 1** Baseline characteristics of patients with all forms of PAH

| Source                                           | PAH agent           | Female, <i>n</i><br>(%) | Mean age<br>(years) | Mean weight<br>(kg) | WHO functional class, <i>n</i> (%) |              |             |            | Mean baseline<br>6MWD (m) | Mean PAP<br>(mmHg) |
|--------------------------------------------------|---------------------|-------------------------|---------------------|---------------------|------------------------------------|--------------|-------------|------------|---------------------------|--------------------|
|                                                  |                     |                         |                     |                     | I                                  | II           | III         | IV         |                           |                    |
| Galiè <i>et al.</i> (2005) <sup>15</sup>         | Sildenafil          | 209 (76)                | 49                  | 72.7                | 1<br>(1)                           | 107<br>(39)  | 160<br>(58) | 9 (3)      | 343.7                     | 52.8               |
| Singh <i>et al.</i> (2006) <sup>16</sup>         | Sildenafil          | 15 (75)                 | NR                  | NR                  | 0                                  | 8 (40)       | 11 (55)     | 1 (5)      | 262.0                     | 95.4               |
| Simonneau <i>et al.</i><br>(2008) <sup>17</sup>  | Sildenafil          | 213 (80)                | 48                  | 71.4                | 3<br>(1)                           | 68 (26)      | 175<br>(66) | 16 (6)     | 345.3                     | 51.7               |
| Galiè <i>et al.</i> (2009) <sup>18</sup>         | Tadalafil           | 317 (78)                | 54                  | 75.4                | 4<br>(1)                           | 130<br>(32)  | 264<br>(65) | 7 (2)      | 343.6                     | 53.2               |
| Channick <i>et al.</i><br>(2001) <sup>19</sup>   | Bosentan            | 28 (85)                 | 51                  | 86.3                | 0                                  | 0            | 32<br>(100) | 0          | 358.3                     | 54.7               |
| Rubin <i>et al.</i> (2002) <sup>20</sup>         | Bosentan            | 168 (79)                | 48                  | 71.9                | 0                                  | 0            | 195<br>(92) | 18 (9)     | 334.5                     | 54.4               |
| Galiè <i>et al.</i> (2006) <sup>21</sup>         | Bosentan            | 33 (61)                 | 39                  | 63.7                | 0                                  | 0            | 54<br>(100) | 0          | 342.8                     | 76.0               |
| Galiè <i>et al.</i> (2008) <sup>22</sup>         | Bosentan            | 129 (70)                | 45                  | 68.1                | 0                                  | 185<br>(100) | 0           | 0          | 434.5                     | 52.4               |
| Galiè (2008) <sup>23</sup>                       | Ambrisentan         | 311 (79)                | 51                  | 72.1                | 8<br>(2)                           | 151<br>(38)  | 216<br>(55) | 18 (5)     | 344.6                     | 49.2               |
| Rubin <i>et al.</i> (1990) <sup>24</sup>         | Epoprostenol        | 16 (70)                 | 36                  | NR                  | 0                                  | 2 (9)        | 15 (65)     | 6 (26)     | 226.6                     | 60.3               |
| Barst <i>et al.</i> (1996) <sup>25</sup>         | Epoprostenol        | 59 (73)                 | 40                  | NR                  | 0                                  | 0            | 60 (74)     | 21<br>(26) | 294.3                     | 60.0               |
| Badesch <i>et al.</i><br>(2000) <sup>26</sup>    | Epoprostenol        | 96 (87)                 | 55                  | NR                  | 0                                  | 5 (5)        | 87 (78)     | 19<br>(17) | 255.9                     | 50.0               |
| Galiè <i>et al.</i> (2002) <sup>27</sup>         | Beraprost           | 80 (62)                 | 46                  | NR                  | 0                                  | 64 (49)      | 66 (51)     | 0          | 372.5                     | 59.5               |
| McLaughlin <i>et al.</i><br>(2006) <sup>28</sup> | Inhaled<br>iloprost | 53 (79)                 | 50                  | NR                  | 0                                  | 1 (2)        | 63 (94)     | 3 (5)      | 335                       | 52                 |

1  
2  
3  
4  
5  
6  
7  
8  
9  
10  
11  
12  
13  
14  
15  
16  
17  
18  
19  
20  
21  
22  
23  
24  
25  
26  
27  
28  
29  
30  
31  
32  
33  
34  
35  
36  
37  
38  
39  
40  
41  
42  
43  
44  
45  
46  
47  
48  
49

|                                               |                  |          |    |    |   |         |          |        |       |      |
|-----------------------------------------------|------------------|----------|----|----|---|---------|----------|--------|-------|------|
| Hoeper <i>et al.</i> (2006) <sup>29</sup>     | Inhaled iloprost | 31 (78)  | 52 | NR | 0 | 0       | 40 (100) | 0      | 306.0 | 56.6 |
| Simonneau (2002) <sup>30</sup>                | Treprostinil     | 382 (81) | 45 | NR | 0 | 53 (11) | 382 (81) | 34 (7) | 326.5 | 61.0 |
| McLaughlin <i>et al.</i> (2003) <sup>31</sup> | Treprostinil     | 21 (81)  | 37 | NR | 0 | 25 (96) | 1 (4)    | 0      | 376.8 | 60.7 |
| McLaughlin <i>et al.</i> (2010) <sup>32</sup> | Treprostinil     | 191 (81) | 54 | NR | 0 | 0       | 230 (98) | 5 (2)  | 348.6 | NR   |
| Hiremath <i>et al.</i> (2010) <sup>33</sup>   | Treprostinil     | 27 (61)  | 32 | 47 | 0 | 0       | 42 (95)  | 2 (5)  | 250.4 | 65   |

NR, not reported, PAH, pulmonary arterial hypertension; PAP, pulmonary artery pressure; 6MWD, 6-minute walk distance; WHO, World Health Organisation.

**Supplementary table 2** Baseline characteristics of patients with CTD-PAH

| Study                                         | PAH agent    | Female, <i>n</i> (%) | Mean age<br>(years) | Mean weight<br>(kg) | WHO functional class, <i>n</i> (%) |            |            |            | Mean baseline<br>6MWD (m) | Mean PAP<br>(mmHg) |
|-----------------------------------------------|--------------|----------------------|---------------------|---------------------|------------------------------------|------------|------------|------------|---------------------------|--------------------|
|                                               |              |                      |                     |                     | I                                  | II         | III        | IV         |                           |                    |
| Badesch <i>et al.</i><br>(2007) <sup>34</sup> | Sildenafil   | 70 (83)              | 53                  | NR                  | 0                                  | 32<br>(38) | 51<br>(61) | 1 (1)      | 342                       | 47                 |
| Galiè <i>et al.</i><br>(2009) <sup>18</sup>   | Tadalafil    | NR                   | NR                  | NR                  | NR                                 | NR         | NR         | NR         | NR                        | NR                 |
| Denton <i>et al.</i><br>(2006) <sup>35</sup>  | Bosentan     | 55 (83)              | 55                  | NR                  | 0                                  | 0          | 63<br>(96) | 3 (5)      | 328.3                     | 46.4               |
| Launay <i>et al.</i><br>(2010) <sup>36</sup>  | Bosentan     | 36 (74)              | NR                  | NR                  | 0                                  | 6 (12)     | 38<br>(78) | 5 (10)     | 268                       | 46                 |
| Badesch (2007) <sup>37</sup>                  | Ambrisentan  | NR                   | NR                  | NR                  | NR                                 | NR         | NR         | NR         | 335                       | NR                 |
| Badesch <i>et al.</i><br>(2012) <sup>38</sup> | Ambrisentan  | 36 (90)              | 55                  | NR                  | 0                                  | 12<br>(30) | 27<br>(68) | 1 (3)      | 324                       | 45                 |
| Badesch <i>et al.</i><br>(2000) <sup>26</sup> | Epoprostenol | 96 (87)              | 55                  | NR                  | 0                                  | 5 (5)      | 87<br>(78) | 19<br>(17) | 255.9                     | 50.0               |
| Kunieda <i>et al.</i><br>(2009) <sup>39</sup> | Beraprost    | 18 (95)              | 45                  | 47.6                | 3<br>(16)                          | 12<br>(63) | 4 (21)     | 0          | 367.9                     | 39.2               |
| Oudiz <i>et al.</i><br>(2004) <sup>40</sup>   | Treprostinil | 81 (90)              | 51                  | NR                  | 0                                  | 9 (10)     | 67<br>(74) | 14<br>(16) | 288.7                     | NR                 |

CTD, connective tissue disease; NR, not reported; PAH, pulmonary arterial hypertension; PAP, pulmonary artery pressure; 6MWD, 6-minute walk distance; WHO, World Health Organisation.

Supplementary table 3 Risk of bias

| Source                                        | PAH agent        | Random sequence generation | Allocation concealment | Blinding | Other source(s) of bias |
|-----------------------------------------------|------------------|----------------------------|------------------------|----------|-------------------------|
| All forms of PAH                              |                  |                            |                        |          |                         |
| Galiè <i>et al.</i> (2005) <sup>15</sup>      | Sildenafil       | Unclear                    | Low                    | Low      | Low                     |
| Singh <i>et al.</i> (2006) <sup>16</sup>      | Sildenafil       | Unclear                    | Low                    | Low      | Low                     |
| Simonneau <i>et al.</i> (2008) <sup>17</sup>  | Sildenafil       | Low                        | Low                    | Low      | High                    |
| Galiè <i>et al.</i> (2009) <sup>18</sup>      | Tadalafil        | Unclear                    | Unclear                | Low      | Low                     |
| Channick <i>et al.</i> (2001) <sup>19</sup>   | Bosentan         | Low                        | Low                    | Low      | Low                     |
| Rubin <i>et al.</i> (2002) <sup>20</sup>      | Bosentan         | Unclear                    | Unclear                | Low      | Low                     |
| Galiè <i>et al.</i> (2006) <sup>21</sup>      | Bosentan         | Unclear                    | Low                    | Low      | Low                     |
| Galiè <i>et al.</i> (2008) <sup>22</sup>      | Bosentan         | Low                        | Low                    | Low      | Low                     |
| Galiè (2008) <sup>23</sup>                    | Ambrisentan      | Unclear                    | Low                    | Low      | Low                     |
| Rubin <i>et al.</i> (1990) <sup>24</sup>      | Epoprostenol     | Unclear                    | Low                    | High     | Unclear                 |
| Barst <i>et al.</i> (1996) <sup>25</sup>      | Epoprostenol     | Low                        | Unclear                | High     | High                    |
| Badesch <i>et al.</i> (2000) <sup>26</sup>    | Epoprostenol     | Low                        | Unclear                | High     | Low                     |
| Galiè <i>et al.</i> (2002) <sup>27</sup>      | Beraprost        | Unclear                    | Unclear                | Low      | Low                     |
| McLaughlin <i>et al.</i> (2006) <sup>28</sup> | Inhaled iloprost | Low                        | Low                    | Low      | Low                     |
| Hoeper <i>et al.</i> (2006) <sup>29</sup>     | Inhaled iloprost | Low                        | Low                    | High     | High                    |
| Simonneau (2002) <sup>30</sup>                | Treprostinil     | Low                        | Unclear                | Low      | Low                     |
| McLaughlin <i>et al.</i> (2003) <sup>31</sup> | Treprostinil     | Unclear                    | Unclear                | Low      | Low                     |
| McLaughlin <i>et al.</i> (2010) <sup>32</sup> | Treprostinil     | Unclear                    | Unclear                | Low      | Low                     |
| Hiremath <i>et al.</i> (2010) <sup>33</sup>   | Treprostinil     | Unclear                    | Unclear                | Low      | Low                     |
| CTD-PAH                                       |                  |                            |                        |          |                         |
| Badesch <i>et al.</i> (2007) <sup>34</sup>    | Sildenafil       | Unclear                    | Low                    | Low      | Low                     |
| Galiè <i>et al.</i> (2009) <sup>18</sup>      | Tadalafil        | Unclear                    | Unclear                | Low      | Low                     |
| Denton <i>et al.</i> (2006) <sup>35</sup>     | Bosentan         | Unclear                    | Unclear                | Low      | High                    |
| Launay <i>et al.</i> (2010) <sup>36</sup>     | Bosentan         | High                       | High                   | High     | High                    |

| Source                                     | PAH agent    | Random sequence generation | Allocation concealment | Blinding | Other source(s) of bias |
|--------------------------------------------|--------------|----------------------------|------------------------|----------|-------------------------|
| Badesch (2007) <sup>37</sup>               | Ambrisentan  | Unclear                    | Low                    | Low      | Unclear                 |
| Badesch <i>et al.</i> (2012) <sup>38</sup> | Ambrisentan  | High                       | High                   | High     | High                    |
| Badesch <i>et al.</i> (2000) <sup>26</sup> | Epoprostenol | Low                        | Unclear                | No       | Low                     |
| Kunieda <i>et al.</i> (2009) <sup>39</sup> | Beraprost    | High                       | High                   | High     | High                    |
| Oudiz <i>et al.</i> (2004) <sup>40</sup>   | Treprostinil | Unclear                    | Unclear                | Low      | Low                     |

CTD, connective tissue disease; PAH, pulmonary arterial hypertension.



**Pulmonary arterial hypertension associated with connective tissue disease: meta-analysis of clinical trials**

|                                 |                                                                                                                                                                                                                                                                                                                                                               |
|---------------------------------|---------------------------------------------------------------------------------------------------------------------------------------------------------------------------------------------------------------------------------------------------------------------------------------------------------------------------------------------------------------|
| Journal:                        | <i>BMJ Open</i>                                                                                                                                                                                                                                                                                                                                               |
| Manuscript ID:                  | bmjopen-2013-003113.R1                                                                                                                                                                                                                                                                                                                                        |
| Article Type:                   | Research                                                                                                                                                                                                                                                                                                                                                      |
| Date Submitted by the Author:   | 10-Jun-2013                                                                                                                                                                                                                                                                                                                                                   |
| Complete List of Authors:       | Kuwana, Masataka; Keio University School of Medicine, Department of Internal Medicine, Division of Rheumatology<br>Watanabe, Hiroshi; Hamamatsu University School of Medicine, Department of Clinical Pharmacology and Therapeutics<br>Matsuoka, Nobushige; Pfizer, Division of Clinical Statistics<br>Sugiyama, Naonobu; Pfizer, Division of Medical Affairs |
| <b>Primary Subject Heading</b>: | Rheumatology                                                                                                                                                                                                                                                                                                                                                  |
| Secondary Subject Heading:      | Cardiovascular medicine, Evidence based practice, Medical management, Pharmacology and therapeutics, Respiratory medicine                                                                                                                                                                                                                                     |
| Keywords:                       | Hypertension < CARDIOLOGY, Cardiology < INTERNAL MEDICINE, Dermatology < INTERNAL MEDICINE, Rheumatology < INTERNAL MEDICINE, Vascular medicine < INTERNAL MEDICINE, THORACIC MEDICINE                                                                                                                                                                        |
|                                 |                                                                                                                                                                                                                                                                                                                                                               |

SCHOLARONE™  
Manuscripts

only

1  
2  
3  
4 **Pulmonary arterial hypertension associated with connective tissue disease:**  
5  
6 **meta-analysis of clinical trials**  
7  
8  
9

10 Masataka Kuwana,<sup>1</sup> Hiroshi Watanabe,<sup>2</sup> Nobushige Matsuoka,<sup>3</sup> Naonobu Sugiyama<sup>4</sup>  
11  
12

13  
14  
15 <sup>1</sup>Division of Rheumatology, Department of Internal Medicine, Keio University School of  
16  
17  
18  
19  
20  
21  
22  
23  
24  
25  
26  
27  
28  
29  
30  
31  
32  
33  
34  
35  
36  
37  
38  
39  
40  
41  
42  
43  
44  
45  
46  
47  
48  
49  
50  
51  
52  
53  
54  
55  
56  
57  
58  
59  
60

Medicine, Tokyo, Japan

<sup>2</sup>Department of Clinical Pharmacology and Therapeutics, Hamamatsu University School of  
Medicine, Shizuoka, Japan

<sup>3</sup>Division of Clinical Statistics, Pfizer Japan Inc.

<sup>4</sup>Division of Medical Affairs, Pfizer Japan Inc.

**Correspondence to** Masataka Kuwana

Department of Internal Medicine, Division of Rheumatology, Keio University School of  
Medicine, 35 Shinanomachi, Shinjuku-ku, Tokyo 160-8582, Japan.

TEL: 81-3-3350-3567; FAX: 81-3-3350-3567

E-mail: kuwanam@z5.keio.jp

**Running head:** Pulmonary arterial hypertension associated with connective tissue disease

## Abstract

**Objectives:** Few studies have focused on pulmonary arterial hypertension (PAH) associated with connective tissue diseases (CTDs). The optimal treatment for CTD-PAH has yet to be established. **Design:** Meta-analysis of data from evaluations of treatment for PAH generally (19 studies) and CTD-PAH specifically (9 studies) to compare the effects of pulmonary vasodilative PAH agents. MEDLINE, EMBASE, and BIOSIS were searched. English-language full-text articles published between January 1990 and August 2012 were eligible. **Setting:** International. **Participants:** Patients with PAH generally ( $n=3073$ ) and CTD-PAH specifically ( $n=678$ ). **Primary outcome measure:** Exercise capacity (6-minute walk distance, 6MWD). **Results:** Patients with PAH (all forms) had mean age 32–55 years (women, 61–87%); CTD-PAH patients had mean age 45–55 years (women, 74–95%). Overall estimate of mean change in 6MWD from baseline (95%CI) for the active treatment group versus the control group in all PAH patients was 34.6 m (27.4 to 41.9 m). Pooled mean differences from the results for patients receiving placebo by subgroup of patients receiving phosphodiesterase (PDE)-5 inhibitors, endothelin receptor antagonists (ERAs), and prostacyclin (PGI<sub>2</sub>) analogues were 22.4–45.5 m, 39.5–44.2 m, and 12.4–64.9 m, respectively. Overall estimate of mean difference between changes in 6MWD in CTD-PAH patients was 34.2 m (23.3 to 45.0 m). Pooled mean differences by subgroup of patients receiving PDE-5 inhibitors, ERAs, and PGI<sub>2</sub> analogues in CTD-PAH patients were 37.0–47.1 m, 14.1–21.7 m, and 21.0–108.0 m, respectively. ERAs were less effective in CTD-PAH patients than all-form PAH patients: 14.1 m (–4.4 to 32.6 m) versus 39.5 m (19.5 to 59.6 m) for bosentan, and 21.7 m (2.2 to 41.3 m) versus 44.2 m (30.2 to 58.2 m) for ambrisentan. **Conclusions:** All 3



1  
2  
3  
4  
5  
6  
7  
8  
9  
10  
11  
12  
13  
14  
15  
16  
17  
18  
19  
20  
21  
22  
23  
24  
25  
26  
27  
28  
29  
30  
31  
32  
33  
34  
35  
36  
37  
38  
39  
40  
41  
42  
43  
44  
45  
46  
47  
48  
49  
50  
51  
52  
53  
54  
55  
56  
57  
58  
59  
60

types of PAH agent are effective. However, ERAs may be a less effective choice against CTD-PAH; further studies are needed. Limitations include the limited number of studies for some agents and for CTD-PAH patients.

For peer review only

## Article summary

### Article focus

- Pulmonary arterial hypertension (PAH) is a progressive disease characterised by abnormally high blood pressure in the pulmonary arteries.
- Patients with PAH associated with connective tissue diseases (CTDs) such as systemic sclerosis (SSc) have a particularly poor prognosis.
- Few studies have focused on patients with CTD-PAH, so the optimal treatment for these patients is unclear.

### Key messages

- The effects of the phosphodiesterase-5 inhibitors sildenafil and tadalafil, and the prostacyclin analogue epoprostenol, are consistent in patients with CTD-PAH and in those with PAH generally.
- The endothelin receptor antagonists bosentan and ambrisentan may be less effective in patients with CTD-PAH than in those with PAH generally.

### Strengths and limitations of this study

- The meta-analysis used all currently available data from clinical studies on treatment for PAH.
- Few studies were identified for some PAH agents and for CTD-PAH patients.
- Study designs and patient background characteristics, including the percentages of patients with SSc-PAH, were inconsistent between studies.

## Introduction

Pulmonary hypertension is a heterogeneous condition with sustained elevation of pressure in the pulmonary arteries, and is defined as mean pulmonary artery pressure  $\geq 25$  mmHg at rest.<sup>1</sup> The most recent and widely accepted clinical classification of pulmonary hypertension is that proposed at the Fourth World Symposium on Pulmonary Hypertension at Dana Point in 2008.<sup>2</sup> It classifies pulmonary hypertension into 5 groups. Group 1 comprises pulmonary arterial hypertension (PAH), which includes idiopathic PAH, heritable PAH, drug- and toxin-induced PAH, PAH associated with various diseases, and persistent pulmonary hypertension of the newborn. Group 2 comprises pulmonary hypertension owing to left heart disease; group 3, pulmonary hypertension owing to lung diseases and/or hypoxia; group 4, chronic thromboembolic pulmonary hypertension; and group 5, pulmonary hypertension of unknown cause. In this classification of pulmonary hypertension, PAH is recognised as having an extremely poor prognosis and requires specific medical treatment.

Connective tissue disease (CTD) is the most common condition associated with PAH. Recent cohort studies have shown that most patients with PAH associated with CTD have systemic sclerosis (SSc).<sup>3,4</sup> In fact, the prevalence of PAH in patients with SSc is reported to be 7–12%.<sup>5,6</sup> Patients with SSc-PAH have poor prognosis compared with patients with idiopathic PAH.<sup>7</sup> Therefore, early and appropriate diagnosis and selection of the optimal treatment regimen are important for SSc-PAH, to improve the hemodynamics, exercise capacity, and eventually survival of patients.

The optimal treatment for PAH has not been established. However, there has been major progress in medical treatment for PAH in recent years. Several new agents with different

1  
2  
3 mechanisms have been introduced, including phosphodiesterase (PDE)-5 inhibitors (e.g. oral  
4 sildenafil and tadalafil), endothelin receptor antagonists (ERAs) (e.g. oral bosentan and  
5  
6 ambrisentan), and prostacyclin (PGI<sub>2</sub>) analogues (e.g. continuous intravenous epoprostenol).  
7  
8  
9  
10  
11 The introduction of these new agents is expected to contribute to the improvement of exercise  
12  
13 capacity, subjective symptoms, and quality of life, as well as the short- and long-term  
14  
15 survival of patients.  
16

17  
18 Although the efficacy and safety of these new agents have been shown in small- or  
19  
20 medium-scale randomised controlled trials (RCTs) and open-label trials, evidence from  
21  
22 large-scale comparative studies of these agents remains insufficient because PAH is a rare  
23  
24 disease. Therefore, to compare the new agents and establish a therapeutic strategy for PAH,  
25  
26 several systematic reviews and meta-analyses of available clinical study results have been  
27  
28 done.<sup>8-13</sup> However, most of these analyses include studies on all forms of PAH, and studies  
29  
30 that focus on CTD-PAH are limited. In fact, our literature search showed only one such  
31  
32 report: a meta-analysis by Avouac *et al.*,<sup>8</sup> which investigated the efficacy of oral PAH agents  
33  
34 mainly in patients with SSc.  
35  
36  
37  
38  
39

40 Therefore, in this meta-analysis of studies designed as RCTs and open-label, single-arm  
41  
42 trials, we aimed to evaluate the effect of each PAH agent on exercise capacity in patients with  
43  
44 CTD-PAH compared with patients with all forms of PAH. We chose 6-minute walk distance  
45  
46 (6MWD) as an endpoint because it was used as a primary endpoint in most previous  
47  
48 randomised studies of PAH agents.<sup>14</sup>  
49  
50  
51  
52  
53

## 54 **Methods**

55  
56  
57  
58  
59  
60

### *Eligibility criteria*

To evaluate the effects of 3 typical types of PAH agent, we included RCTs in which the following PAH agents were administered to patients with all forms of PAH.

- PDE-5 inhibitors: sildenafil and tadalafil
- ERAs: bosentan and ambrisentan
- PGI<sub>2</sub> analogues: epoprostenol, beraprost, iloprost, and treprostinil.

Because the number of RCTs in patients with CTD-PAH is limited, we also included open-label, single-arm trials evaluating the effects of PAH agents in patients with CTD-PAH.

We excluded reviews and non-interventional studies (e.g. case reports and observational studies as opposed to RCTs). We included only principal studies and excluded ad hoc analyses. Studies in which results for 6MWD were not reported were also excluded, as were studies on pulmonary hypertension other than PAH.

### *Search strategy*

We searched MEDLINE, EMBASE, and BIOSIS for English-language full-text articles published between January 1990 and August 2012, using the key terms ‘pulmonary arterial hypertension’, ‘6 minute walk’, and the names of individual drugs. In addition to these key terms, we used the term ‘randomised controlled trial’ or ‘RCT’ to identify RCTs evaluating all forms of PAH, and ‘connective tissue disease’ or ‘CTD’ to identify studies evaluating CTD-PAH. The last search was run on 5 December 2012. Additional studies were identified through manual searching.

### *Primary endpoint*

1  
2  
3  
4 The primary outcome measure was the difference in mean change from baseline in 6MWD  
5  
6 between groups. However, for single-arm studies, the mean change from baseline was used as  
7  
8 the primary outcome measure.  
9

### 10 11 12 13 *Data collection*

14  
15 Relevant data were extracted and reviewed by NM and NS. Data on study characteristics  
16  
17 (year and design), variables including PAH agents used, total patient numbers and the  
18  
19 percentage of CTD-PAH patients, and outcomes (mean difference, m and 95%CI, m or  
20  
21 standard error) were extracted.  
22  
23  
24  
25

### 26 27 28 *Risk of bias*

29  
30 To determine the validity of the included studies, we assessed the risk of bias for each study  
31  
32 in terms of random sequence generation, allocation concealment, blinding, and other sources  
33  
34 of bias, as recommended by the Cochrane Collaboration. Each domain was judged to have  
35  
36 high, low, or unclear risk of bias. We did not detect clear publication bias, because the  
37  
38 number of included studies was small.  
39  
40  
41  
42  
43

### 44 45 *Statistical analysis*

46  
47 We pooled outcomes by each PAH agent for all forms of PAH and for CTD-PAH. We used a  
48  
49 random effects model based on the DerSimonian–Laird method because of known clinical  
50  
51 and methodological heterogeneity (e.g. the various doses of each PAH agent).  $I^2$  values were  
52  
53 calculated as a measure of heterogeneity. The  $I^2$  statistic, which describes the percentage of  
54  
55 variability in effect estimates that is due to heterogeneity rather than sampling error (chance),  
56  
57  
58  
59  
60

and we considered  $I^2 > 75\%$  as representing considerable heterogeneity.

## Results

### *Selection of studies*

A total of 196 articles were identified for evaluation of treatments for all forms of PAH. Of these, 19 articles (reporting data from 3073 patients) met the eligibility criteria for evaluations of treatments for all forms of PAH (3 articles for sildenafil,<sup>15-17</sup> 1 article for tadalafil,<sup>18</sup> 4 articles for bosentan,<sup>19-22</sup> 1 article for ambrisentan,<sup>23</sup> 3 articles for epoprostenol,<sup>24-26</sup> 1 article for beraprost,<sup>27</sup> 2 articles for iloprost,<sup>28 29</sup> and 4 articles for treprostini<sup>30-33</sup>) (figure 1a). The main reasons for exclusion were that the article was a review and that the article reported the results of a study that involved patients other than those with PAH.

For evaluation of treatments for CTD-PAH, a total of 269 articles were identified. Of these, 9 articles (reporting data from 678 patients) met the eligibility criteria for evaluations of treatments for CTD-PAH (1 article for sildenafil,<sup>34</sup> 1 article for tadalafil,<sup>18</sup> 2 articles for bosentan,<sup>35 36</sup> 2 articles for ambrisentan,<sup>37 38</sup> 1 article for epoprostenol,<sup>26</sup> 1 article for beraprost,<sup>39</sup> and 1 article for treprostini<sup>40</sup>) (figure 1b). The main reasons for exclusion were that the article was a review and that the article reported the results of a study that involved patients other than those with CTD-PAH.

### *Characteristics and overview of the included studies*

Of the 19 studies on treatments for all forms of PAH included in this analysis (table 1), 15

1  
2  
3  
4 were randomised, placebo-controlled, double-blind studies,<sup>15–23 27 28 30–33</sup> 3 were randomised,  
5  
6 open-label studies comparing with conventional treatment;<sup>24–26</sup> and 1 was a randomised,  
7  
8 open-label study evaluating the effects of iloprost when added to bosentan.<sup>29</sup> The observation  
9  
10 period was either 12 or 16 weeks in most of the studies, with some exceptions (1 study each  
11  
12 with 6- and 24-week observation periods,<sup>16 22</sup> and 2 studies with an 8-week observation  
13  
14 period<sup>24 31</sup>). Of the placebo-controlled randomised comparative studies, 1 study of sildenafil  
15  
16 was done in patients previously treated with epoprostenol;<sup>17</sup> 2 studies of iloprost, in patients  
17  
18 previously treated with bosentan,<sup>28 29</sup> and 1 study of treprostinil, in patients previously treated  
19  
20 with bosentan or sildenafil.<sup>32</sup>

21  
22 Of the 9 studies on treatments for CTD-PAH included in this analysis (table 2), 5 were  
23  
24 placebo-controlled, double-blind studies,<sup>18 34 35 37 40</sup> 1 was a randomised, open-label study  
25  
26 comparing with conventional treatment,<sup>26</sup> and 3 were open-label, single-arm studies.<sup>36 38 39</sup>  
27  
28 The observation period in these studies was 8–28 weeks. One study each evaluating  
29  
30 bosentan<sup>36</sup> and epoprostenol<sup>26</sup> included only SSc-PAH patients.  
31  
32

### 33 34 35 36 37 38 39 40 *Background of all PAH patients*

41  
42 The background of all PAH patients, based on data from the 19 studies, can be summarised as  
43  
44 follows (full data in supplementary table 1). Mean age was 32–55 years, and the percentage  
45  
46 of women was 61–87%. In the studies of sildenafil,<sup>15–17</sup> tadalafil,<sup>18</sup> ambrisentan,<sup>23</sup> and  
47  
48 beraprost,<sup>27</sup> most patients were classified according to World Health Organisation functional  
49  
50 class (WHO-FC) as in WHO-FC II or III, with 1 study including only patients in  
51  
52 WHO-FC II.<sup>22</sup> In contrast, in the studies of epoprostenol,<sup>24–26</sup> the percentage of patients in  
53  
54 WHO-FC IV was higher than that in studies of other agents. In the studies of iloprost, most  
55  
56  
57  
58  
59  
60



1  
2  
3 patients were in WHO-FC III.<sup>28 29</sup> In the studies of treprostinil, most patients were in  
4 WHO-FC III in 3 studies<sup>30 32 33</sup> and in WHO-FC II in 1 study.<sup>31</sup> Baseline 6MWD was  
5 226.6–434.5 m, and it was lower in the 3 studies of epoprostenol (226.6, 294.3, and  
6 255.9 m)<sup>24–26</sup> compared with in studies on other agents. Therefore patients with more severe  
7 disease were included in the studies of epoprostenol than in other studies. One study of  
8 bosentan included only patients with Eisenmenger syndrome.<sup>21</sup>  
9  
10  
11  
12  
13  
14  
15  
16  
17  
18  
19

### 20 *Background of the subgroup of CTD-PAH patients*

21 The background of patients with CTD-PAH, using data from 9 studies, can be summarised as  
22 follows (full data in supplementary table 2). Mean age was 45–55 years, and the percentage  
23 of women was 74–95%. In 1 study of tadalafil, there was no information on baseline 6MWD  
24 or WHO-FC.<sup>18</sup> As for the distribution of patients according to WHO-FC, a study of beraprost  
25 included more patients in WHO-FC II,<sup>39</sup> and a study of epoprostenol included more patients  
26 in WHO-FC IV,<sup>26</sup> compared with studies of other agents.  
27  
28  
29  
30  
31  
32  
33  
34  
35  
36

37 In 5 studies in which information on underlying CTDs was available, SSc-PAH patients  
38 accounted for 45–100% of all patients included. Their mean age was 51–55 years, and the  
39 percentage of women was 74–90%.  
40  
41  
42  
43

44 In studies of bosentan<sup>36</sup> and epoprostenol<sup>26</sup> that included only SSc-PAH patients, baseline  
45 6MWD was < 300 m, which was lower than that in studies of other agents. Therefore the  
46 study of beraprost included more patients with relatively mild PAH, whereas the study of  
47 epoprostenol included more patients with more severe disease.  
48  
49  
50  
51  
52  
53  
54  
55

### 56 *Results of 6MWD*

1  
2  
3  
4 The actual values of the outcomes for each study are presented on the right sides of figures 2  
5  
6 and 3. We pooled the data, including those for non-approved doses, to evaluate the effect of  
7  
8 each PAH agent on exercise capacity in patients with CTD-PAH compared with in patients  
9  
10 with all forms of PAH.  
11  
12

### 13 14 15 16 *6MWD in All PAH patients*

17  
18 The mean differences between changes in 6MWD compared with the control group are  
19  
20 shown in figure 2 by each agent. With a random effects model, the pooled mean difference  
21  
22 between changes in 6MWD was 45.5 m (95% confidence interval (CI) 32.9 to 58.1 m,  
23  
24  $I^2=50.1%$ ) for sildenafil, 22.4 m (95%CI 14.0 to 30.9 m,  $I^2=7.9%$ ) for tadalafil, 39.5 m  
25  
26 (95%CI 19.5 to 59.6 m,  $I^2=38.3%$ ) for bosentan, 44.2 m (95%CI 30.2 to 58.2 m,  $I^2=0%$ ) for  
27  
28 ambrisentan, 64.9 m (95%CI 20.4 to 109.4 m,  $I^2=43.3%$ ) for epoprostenol, 25.1 m (95%CI  
29  
30 1.9 to 48.4 m,  $I^2=$  not applicable [NA]) for beraprost, 12.4 m (95%CI -21.9 to 46.6 m,  
31  
32  $I^2=39.7%$ ) for iloprost, and 17.3 m (95%CI 6.1 to 28.4 m,  $I^2=29.4%$ ) for treprostinil.  
33  
34  
35  
36

37  
38 Numerical improvement in 6MWD was obtained in patients using each agent compared with  
39  
40 those using the control agent. The pooled mean difference between changes in 6MWD from  
41  
42 the control group ranged from 12.4 to 64.9 m, and the overall estimate of mean difference was  
43  
44 34.6 m (95%CI 27.4 to 41.9 m,  $I^2=63.2%$ ). The ranges of mean difference from the effects of  
45  
46 placebo by subgroup of patients receiving PDE-5 inhibitors, ERAs, and PGI<sub>2</sub> analogues were  
47  
48 22.4–45.5 m, 39.5–44.2 m, and 12.4–64.9 m, respectively. Considerable heterogeneity was  
49  
50 not observed.  
51  
52  
53

### 54 55 56 57 *6MWD in a subgroup of CTD-PAH patients*

1  
2  
3  
4 In the subgroup of CTD-PAH patients, the mean differences between changes in 6MWD  
5  
6 compared with the control group are shown in figure 3 by each agent. For single-arm studies,  
7  
8 the mean changes from baseline are shown. With a random effects model, the pooled mean  
9  
10 difference between changes in 6MWD was 47.1 m (95%CI 27.9 to 66.3 m,  $I^2=0\%$ ) for  
11  
12 sildenafil, 37.0 m (95%CI 19.0 to 55.0 m,  $I^2=0\%$ ) for tadalafil, 14.1 m (95%CI -4.4 to 32.6 m,  
13  
14  $I^2=0\%$ ) for bosentan, 21.7 m (95%CI 2.2 to 41.3 m,  $I^2=0\%$ ) for ambrisentan, 108.0 m (95%CI  
15  
16 45.6 to 170.4 m,  $I^2=NA$ ) for epoprostenol, 58.5 m (95%CI 21.4 to 95.6 m,  $I^2=NA$ ) for  
17  
18 beraprost, and 21.0 m (95%CI -6.9 to 48.9 m,  $I^2=NA$ ) for treprostinil. Numerical  
19  
20 improvement in 6MWD was obtained in patients using all agents compared with those using  
21  
22 the control agent. The overall estimate of mean difference between changes in 6MWD in  
23  
24 patients with CTD-PAH was 34.2 m (95%CI 23.3 to 45.0 m,  $I^2=32.5\%$ ). The ranges of mean  
25  
26 differences by subgroup of patients receiving PDE-5 inhibitors, ERAs, and PGI<sub>2</sub> analogues  
27  
28 were 37.0–47.1 m, 14.1–21.7 m, and 21.0–108.0 m, respectively. Considerable heterogeneity  
29  
30 was not observed.  
31  
32  
33  
34  
35  
36

37 We did an additional sensitivity analysis excluding open-label single-arm studies for  
38  
39 CTD-PAH patients only (supplementary figure). The overall estimate of mean difference  
40  
41 between changes in 6MWD in patients with CTD-PAH was 37.2 m (95%CI 25.0 to 49.3 m,  
42  
43  $I^2=20.5\%$ ) and the ranges of mean differences by subgroup of patients receiving PDE-5  
44  
45 inhibitors, ERAs, and PGI<sub>2</sub> analogues were 37.0–47.1 m, 19.0–22.1 m, and 21.0–108.0 m,  
46  
47 respectively.  
48  
49  
50  
51  
52  
53

#### 54 *Difference in exercise capacity between all PAH patients and CTD-PAH patients*

55  
56  
57 When the pooled mean differences between changes in 6MWD were compared between all  
58  
59  
60

1  
2  
3 PAH patients and each subgroup of CTD-PAH patients, no difference in exercise capacity  
4  
5 was found between the patient groups for PDE-5 inhibitors (sildenafil and tadalafil). In  
6  
7 contrast, for ERAs (bosentan and ambrisentan), the pooled mean values in CTD-PAH patients  
8  
9 (bosentan, 14.1 m; ambrisentan, 21.7 m) were lower than the lower limit of 95%CI of the  
10  
11 mean values in all PAH patients (bosentan 19.5 to 59.6 m; ambrisentan 30.2 to 58.2 m),  
12  
13 suggesting that effects on exercise capacity may vary between patient groups. For PGI<sub>2</sub>  
14  
15 (epoprostenol, beraprost, and treprostinil), no obvious trends were found between patient  
16  
17 groups.  
18  
19  
20  
21  
22  
23  
24

### 25 *Risk of bias*

26  
27 We rated risk of bias for each study (full data in supplementary table 3). In studies for all  
28  
29 forms of PAH, none were at high risk of bias for random sequence generation or allocation  
30  
31 concealment; however, the method of randomisation and allocation concealment were  
32  
33 unclear (i.e. not reported) for 11 studies and 9 studies, respectively. Four studies were at high  
34  
35 risk of bias for blinding because they were open-label studies. Three studies were at high risk  
36  
37 for another source of bias (imbalance in missing data between groups,<sup>17</sup> imbalance in  
38  
39 baseline 6MWD,<sup>25</sup> and early termination based on futility analysis<sup>29</sup>).  
40  
41  
42  
43  
44

45 Of studies for CTD-PAH, 3 studies were at high risk of bias with respect to all domains  
46  
47 because they were open-label, single-arm studies.<sup>36 38 39</sup> One study was at high risk of bias  
48  
49 resulting from imbalance in baseline characteristics.<sup>35</sup> The remaining studies were judged to  
50  
51 be not of high risk of bias in any of the domains.  
52  
53  
54  
55

### 56 **Discussion**

1  
2  
3  
4  
5  
6 A finding of the present meta-analysis of 19 studies is that in combined patients with all  
7  
8 forms of PAH, all agents increase 6MWD compared with the control group.<sup>15-33</sup> Likewise,  
9  
10 the meta-analysis of 9 studies on CTD-PAH patients also showed an increase in 6MWD by  
11  
12 all agents.<sup>18 26 34-40</sup> The finding that all agents increase 6MWD in all PAH patients is  
13  
14 consistent with the results of the 5 previous systematic reviews and meta-analyses that  
15  
16 evaluated the 3 types of agent (PDE-5 inhibitors, ERAs, and PGI<sub>2</sub> analogues).<sup>9-13</sup> To date,  
17  
18 reports of meta-analyses that included patients with CTD-PAH including SSc-PAH are  
19  
20 limited to 1 study that evaluated 3 oral agents (sildenafil, bosentan, and sitaxsentan) alone.<sup>8</sup>  
21  
22 The findings of this meta-analysis are important because patients with all PAH as well as a  
23  
24 subgroup of CTD-PAH patients were included, and the effects of 3 types of agent, including  
25  
26 intravenous preparations, were thoroughly evaluated. Our meta-analysis shows similar trends  
27  
28 to the findings of Avouac *et al.*<sup>8</sup>  
29  
30  
31  
32  
33  
34

35 When the mean differences between changes in 6MWD were compared between all PAH  
36  
37 patients and CTD-PAH patients, the effects of ERAs (bosentan and ambrisentan) on exercise  
38  
39 tolerance may be less in CTD-PAH patients, whereas no difference in exercise capacity was  
40  
41 found between patient groups for PDE-5 inhibitors and PGI<sub>2</sub> analogues. This result should be  
42  
43 interpreted cautiously because recent data from registries have shown that 6MWD is  
44  
45 significantly lower in patients with CTD-PAH than in those with idiopathic PAH,<sup>441</sup> and a  
46  
47 systematic review has shown that 6MWD may be only partially valid in patients with  
48  
49 SSc-PAH.<sup>42</sup>  
50  
51  
52  
53

54 This analysis has several limitations. First, we could identify only a limited number of  
55  
56 studies for some agents (1 study each for tadalafil, ambrisentan, and beraprost), and studies  
57  
58  
59  
60

1  
2  
3  
4 that included a subgroup of patients with CTD-PAH including SSc-PAH were scarce. Second,  
5  
6 ideally data for patients with CTD-PAH should be compared with those for patients with  
7  
8 other forms of PAH. However, there were insufficient data for forms of PAH other than  
9  
10 CTD-PAH, so this analysis compared data for all PAH and CTD-PAH. Third, the study  
11  
12 designs varied: some studies that included CTD-PAH patients were done in an open-label or  
13  
14 single-arm, open-label manner, some having a short observation period (12 or 16 weeks) or  
15  
16 using combination therapy. Of note, in studies of combination therapy, changes in 6MWD are  
17  
18 expected to be smaller, because patients are already receiving PAH therapy at the start of the  
19  
20 study. Patient background characteristics were also inconsistent between studies: patients  
21  
22 were in various WHO FC classes and had various baseline 6MWD values, which can  
23  
24 influence the effects of each agent, and some articles reported no such information. Moreover,  
25  
26 the percentage of SSc-PAH patients in the study population also varied, which is a study  
27  
28 limitation because there is a difference in treatment response between SSc and non-SSc  
29  
30 patients, and patients with SSc-PAH have poor prognosis compared with patients with other  
31  
32 CTD-PAH.<sup>4 7</sup> In this meta-analysis, the percentages of SSc-PAH patients were as follows: for  
33  
34 sildenafil, 45% in the study by Badesch *et al.*;<sup>34</sup> for bosentan, 79% in the study by Denton *et*  
35  
36 *al.*;<sup>35</sup> and 100% in the study by Launay *et al.*;<sup>36</sup> and for epoprostenol, 100% in the study by  
37  
38 Badesch *et al.*<sup>26</sup> The percentage was unknown in the study of tadalafil by Galiè *et al.*;<sup>18</sup> in  
39  
40 those of ambrisentan by Badesch *et al.*;<sup>37 38</sup> and in that of beraprost by Kunieda *et al.*<sup>39</sup>  
41  
42 Patients with SSc-PAH were more frequently enrolled in studies for bosentan<sup>35 36</sup> than in the  
43  
44 sildenafil study.<sup>34</sup>  
45  
46  
47  
48  
49  
50  
51  
52  
53

54 It would have been interesting to do a sensitivity analysis with the data from SSc-PAH  
55  
56 patients only, but this is not possible for the following reasons. There are only two articles  
57  
58  
59  
60

1  
2  
3  
4 (Launay *et al.*, 2010<sup>36</sup> and Badesch *et al.*, 2000<sup>26</sup>) from which data for the subpopulation of  
5  
6 SSc-PAH patients can be extracted. Another limitation of our study was the inclusion of data  
7  
8 for non-approved, possibly subtherapeutic doses, which may have reduced the effects of the  
9  
10 PAH agents in some studies. Finally, there may be publication bias, so negative results are  
11  
12 likely to be unpublished.<sup>43</sup>  
13  
14

15  
16 Furthermore, the present analysis is intended to compare changes in 6MWD over a short  
17  
18 period of time, therefore whether the results are associated with patient survival remains  
19  
20 unclear. However, 6MWD is effective as an indicator of the severity of PAH.<sup>44</sup> Moreover, an  
21  
22 ongoing large-scale registry, the US Registry to Evaluate Early and Long-Term PAH Disease  
23  
24 Management (REVEAL), which aims to clarify the characteristics and prognosis of PAH  
25  
26 patients and the latest treatment for PAH, has shown that 6MWD is an independent predictor  
27  
28 that is significantly associated with 1-year survival.<sup>45</sup> Several other studies have also  
29  
30 confirmed its role as an independent predictor of prognosis.<sup>46-50</sup> In addition, investigators  
31  
32 who did a placebo-controlled randomised trial of the PDE-5 inhibitor sildenafil have recently  
33  
34 identified the minimum clinically meaningful changes in 6MWD, and concluded that it  
35  
36 would be a useful indicator to determine the efficacy of other PAH agents.<sup>51</sup>  
37  
38  
39  
40  
41

42  
43 However, pharmacological treatment for PAH is shifting from monotherapy to  
44  
45 combination therapy, and it is expected that clinical studies investigating the efficacy of  
46  
47 combination therapy will increase. Therefore, it will be increasingly difficult to do a  
48  
49 meta-analysis that includes all the new studies to detect differences between PAH agents. The  
50  
51 present analysis is meaningful because it included all available clinical study results to date,  
52  
53 and we hope that it contributes to the improvement of the treatment for PAH.  
54  
55

56  
57 In conclusion, the present meta-analysis of studies that included CTD-PAH patients  
58  
59  
60

1  
2  
3 showed an increase in 6MWD by all agents, that is, PDE-5 inhibitors, ERAs, and PGI<sub>2</sub>  
4  
5 analogues. Comparison of the mean differences between changes in 6MWD suggest that, for  
6  
7 bosentan and ambrisentan, the effects on exercise tolerance may differ depending on patient  
8  
9 group, whereas the PDE-5 inhibitors sildenafil and tadalafil and the PGI<sub>2</sub> analogue  
10  
11 epoprostenol show consistent effects regardless of the presence or absence of CTD. Further  
12  
13 studies are needed to clarify the clinical implications of these findings.  
14  
15  
16  
17  
18  
19

### 20 **Competing interests**

21  
22  
23  
24  
25 MK has received research funding from Actelion Pharmaceuticals, GlaxoSmithKline,  
26  
27 Novartis and Pfizer, and lecture fees from Actelion Pharmaceuticals, Pfizer,  
28  
29 GlaxoSmithKline, Nippon Shinyaku, Mitsubishi Tanabe Pharma and Takeda Pharmaceuticals.  
30  
31  
32 WH has received research funding from the Ministry of Health, Labour and Welfare of Japan,  
33  
34 Teika Seiyaku, Takeda Pharmaceuticals, Mochida, Pfizer, Asters and Daiichi Sankyo, and  
35  
36 lecture fees from Pfizer, Actelion, Novartis, Daiich Sankyo, GlaxoSmithKline and Nihon  
37  
38 Shinyaku. NM and NS are employees of Pfizer Japan Inc.  
39  
40  
41  
42  
43  
44

### 45 **Contributors**

46  
47  
48  
49 N. Matsuoka, a statistician employed by Pfizer Japan, collected the data and did the statistical  
50  
51 analyses described in this article.  
52

53  
54 Dr N. Sugiyama, a rheumatologist employed by Pfizer Japan, reviewed the collection and  
55  
56 analyses of the data. He helped conceive and design the meta-analysis, interpret the results,  
57  
58  
59  
60



1  
2  
3  
4 and revise the manuscript.

5  
6 Dr M. Kuwana is directly responsible for the manuscript. He reviewed the data analyses and  
7  
8 drafted the manuscript, providing important intellectual content from the perspective of a  
9  
10 CTD-PAH specialist.  
11

12  
13 Dr H. Watanabe revised the manuscript critically for important intellectual content from the  
14  
15 perspective of a PAH specialist.  
16  
17  
18  
19  
20  
21  
22  
23  
24  
25  
26  
27  
28  
29  
30  
31  
32  
33  
34  
35  
36  
37  
38  
39  
40  
41  
42  
43  
44  
45  
46  
47  
48  
49  
50  
51  
52  
53  
54  
55  
56  
57  
58  
59  
60

## References

1. Badesch DB, Champion HC, Sanchez MA, *et al.* Diagnosis and assessment of pulmonary arterial hypertension. *J Am Coll Cardiol* 2009;54:S55–66.
2. Simonneau G, Robbins IM, Beghetti M, *et al.* Updated clinical classification of pulmonary hypertension. *J Am Coll Cardiol* 2009;54:S43–54.
3. Condliffe R, Kiely DG, Peacock AJ, *et al.* Connective tissue disease-associated pulmonary hypertension in the modern treatment era. *Am J Respir Crit Care Med* 2009;179:151–7.
4. Chung L, Liu J, Parsons L, *et al.* Characterization of connective tissue disease-associated pulmonary arterial hypertension from REVEAL: identifying systemic sclerosis as a unique phenotype. *Chest* 2010;138:1383–94.
5. Hachulla E, Gressin V, Guilevin L, *et al.* Early detection of pulmonary arterial hypertension in systemic sclerosis: a French nationwide prospective multicenter study. *Arthritis Rheum* 2005;52:3792–800.
6. Mukerjee D, St George D, Coleiro B, *et al.* Prevalence and outcome in systemic sclerosis associated pulmonary arterial hypertension: application of a registry approach. *Ann Rheum Dis* 2003;62:1088–93.
7. Kawut SM, Taichman DB, Archer-Chicko CL, *et al.* Hemodynamics and survival in patients with pulmonary arterial hypertension related to systemic sclerosis. *Chest* 2003;123:344–50.
8. Avouac J, Wipff J, Kahan A, *et al.* Effects of oral treatments on exercise capacity in systemic sclerosis related pulmonary arterial hypertension: a meta-analysis of

- 1  
2  
3  
4 randomised controlled trials. *Ann Rheum Dis* 2008;67:808–14.
- 5  
6 9. Galiè N, Manes A, Negro L, *et al*. A meta-analysis of randomized controlled trials in  
7  
8 pulmonary arterial hypertension. *Eur Heart J* 2009;30:394–403.
- 9  
10  
11 10. Galiè N, Palazzini M, Manes A. Pulmonary arterial hypertension: from the kingdom of  
12  
13 the near-dead to multiple clinical trial meta-analyses. *Eur Heart J* 2010;31:2080–6.
- 14  
15  
16 11. Macchia A, Marchioli R, Tognoni G, *et al*. Systematic review of trials using vasodilators  
17  
18 in pulmonary arterial hypertension: why a new approach is needed. *Am Heart J*  
19  
20 2010;159:245–57.
- 21  
22  
23 12. He B, Zhang F, Li X, *et al*. Meta-analysis of randomized controlled trials on treatment of  
24  
25 pulmonary arterial hypertension. *Circ J* 2010;74:1458–64.
- 26  
27  
28 13. Ryerson CJ, Nayar S, Swiston JR, *et al*. Pharmacotherapy in pulmonary arterial  
29  
30 hypertension: a systematic review and meta-analysis. *Respir Res* 2010;11:12.
- 31  
32  
33 14. McLaughlin VV, Badesch DB, Delcroix M, *et al*. End points and clinical trial design in  
34  
35 pulmonary arterial hypertension. *J Am Coll Cardiol* 2009;54:S97–107.
- 36  
37  
38 15. Galiè N, Ghofrani HA, Torbicki A, *et al*. Sildenafil citrate therapy for pulmonary arterial  
39  
40 hypertension. *N Engl J Med* 2005;353:2148–57.
- 41  
42  
43 16. Singh TP, Rohit M, Grover A, *et al*. A randomized, placebo-controlled, double-blind,  
44  
45 crossover study to evaluate the efficacy of oral sildenafil therapy in severe pulmonary  
46  
47 artery hypertension. *Am Heart J* 2006;151:851.e1–5.
- 48  
49  
50 17. Simonneau G, Rubin LJ, Galiè N, *et al*. Addition of sildenafil to long-term intravenous  
51  
52 epoprostenol therapy in patients with pulmonary arterial hypertension: a randomized trial.  
53  
54 *Ann Intern Med* 2008;149:521–30.
- 55  
56  
57 18. Galiè N, Brundage BH, Ghofrani HA, *et al*. Tadalafil therapy for pulmonary arterial  
58  
59  
60

- 1  
2  
3  
4 hypertension. *Circulation* 2009;119:2894–903.
- 5  
6 19. Channick RN, Simonneau G, Sitbon O, *et al.* Effects of the dual endothelin-receptor  
7  
8 antagonist bosentan in patients with pulmonary hypertension: a randomised placebo-  
9  
10 controlled study. *Lancet* 2001;358:1119–23.
- 11  
12  
13 20. Rubin LJ, Badesch DB, Barst RJ, *et al.* Bosentan therapy for pulmonary arterial  
14  
15 hypertension. *N Engl J Med* 2002;346:896–903.
- 16  
17  
18 21. Galiè N, Beghetti M, Gatzoulis MA, *et al.* Bosentan therapy in patients with  
19  
20 Eisenmenger syndrome: a multicenter, double-blind, randomized, placebo-controlled  
21  
22 study. *Circulation* 2006;114:48–54.
- 23  
24  
25 22. Galiè N, Rubin LJ, Hoeper M, *et al.* Treatment of patients with mildly symptomatic  
26  
27 pulmonary arterial hypertension with bosentan (EARLY study): a double-blind,  
28  
29 randomised controlled trial. *Lancet* 2008;371:2093–100.
- 30  
31  
32 23. Galiè N, Olschewski H, Oudiz RJ, *et al.* Ambrisentan for the treatment of pulmonary  
33  
34 arterial hypertension: results of the ambrisentan in pulmonary arterial hypertension,  
35  
36 randomized, double-blind, placebo-controlled, multicenter, efficacy (ARIES) study 1 and  
37  
38 2. *Circulation* 2008;117:3010–9.
- 39  
40  
41  
42 24. Rubin LJ, Mendoza J, Hood M, *et al.* Treatment of primary pulmonary hypertension with  
43  
44 continuous intravenous prostacyclin (epoprostenol). Results of a randomized trial. *Ann*  
45  
46 *Intern Med* 1990;112:485–91.
- 47  
48  
49 25. Barst RJ, Rubin LJ, Long WA, *et al.* A comparison of continuous intravenous  
50  
51 epoprostenol (prostacyclin) with conventional therapy for primary pulmonary  
52  
53 hypertension. The Primary Pulmonary Hypertension Study Group. *N Engl J Med*  
54  
55 1996;334:296–302.
- 56  
57  
58  
59  
60

- 1  
2  
3  
4 26. Badesch DB, Tapson VF, McGoon MD, *et al.* Continuous intravenous epoprostenol for  
5  
6 pulmonary hypertension due to the scleroderma spectrum of disease. A randomized,  
7  
8 controlled trial. *Ann Intern Med* 2000;132:425–34.  
9  
10  
11 27. Galiè N, Humbert M, Vachiéry JL, *et al.* Effects of beraprost sodium, an oral  
12  
13 prostacyclin analogue, in patients with pulmonary arterial hypertension: a randomized,  
14  
15 double-blind, placebo-controlled trial. *J Am Coll Cardiol* 2002;39:1496–502.  
16  
17  
18 28. McLaughlin VV, Oudiz RJ, Frost A, *et al.* Randomized study of adding inhaled iloprost  
19  
20 to existing bosentan in pulmonary arterial hypertension. *Am J Respir Crit Care Med*  
21  
22 2006;174:1257–63.  
23  
24  
25 29. Hoeper MM, Leuchte H, Halank M, *et al.* Combining inhaled iloprost with bosentan in  
26  
27 patients with idiopathic pulmonary arterial hypertension. *Eur Respir J* 2006;28:691–4.  
28  
29  
30 30. Simonneau G, Barst RJ, Galiè N, *et al.* Continuous subcutaneous infusion of treprostinil,  
31  
32 a prostacyclin analogue, in patients with pulmonary arterial hypertension: a double-blind,  
33  
34 randomized, placebo-controlled trial. *Am J Respir Crit Care Med* 2002;165:800–4.  
35  
36  
37 31. McLaughlin VV, Gaine SP, Barst RJ, *et al.* Efficacy and safety of treprostinil: an  
38  
39 epoprostenol analog for primary pulmonary hypertension. *J Cardiovasc Pharmacol*  
40  
41 2003;41:293–9.  
42  
43  
44 32. McLaughlin VV, Benza RL, Rubin LJ, *et al.* Addition of inhaled treprostinil to oral  
45  
46 therapy for pulmonary arterial hypertension. *J Am Coll Cardiol* 2010;55:1915–22.  
47  
48  
49 33. Hiremath J, Thanikachalam S, Parikh K, *et al.* Exercise improvement and plasma  
50  
51 biomarker changes with intravenous treprostinil therapy for pulmonary arterial  
52  
53 hypertension: a placebo-controlled trial. *J Heart Lung Transplant* 2010;29:137–49.  
54  
55  
56 34. Badesch DB, Hill NS, Burgess G, *et al.* Sildenafil for pulmonary arterial hypertension  
57  
58  
59  
60

- 1  
2  
3  
4 associated with connective tissue disease. *J Rheumatol* 2007;34:2417–22.
- 5  
6 35. Denton CP, Humbert M, Rubin L, *et al.* Bosentan treatment for pulmonary arterial  
7  
8 hypertension related to connective tissue disease: a subgroup analysis of the pivotal  
9  
10 clinical trials and their open-label extensions. *Ann Rheum Dis* 2006;65:1336–40.
- 11  
12  
13 36. Launay D, Sitbon O, Le Pavec J, *et al.* Long-term outcome of systemic  
14  
15 sclerosis-associated pulmonary arterial hypertension treated with bosentan as first-line  
16  
17 monotherapy followed or not by the addition of prostanoids or sildenafil. *Rheumatology*  
18  
19 2010;49:490–500.
- 20  
21  
22 37. Badesch DB. Ambrisentan therapy for pulmonary arterial hypertension: a comparison by  
23  
24 PAH etiology. *Chest* 2007;slide presentations:488S.
- 25  
26  
27 38. Badesch DB, Feldman J, Keogh A, *et al.* ARIES-3: ambrisentan therapy in a diverse  
28  
29 population of patients with pulmonary hypertension. *Cardiovasc Ther* 2012;30:93–9.
- 30  
31  
32 39. Kunieda T, Nakanishi N, Matsubara H, *et al.* Effects of long-acting beraprost sodium  
33  
34 (TRK-100STP) in Japanese patients with pulmonary arterial hypertension. *Int Heart J*  
35  
36 2009;50:513–29.
- 37  
38  
39 40. Oudiz R, Schilz RJ, Barst RJ, *et al.* Treprostinil, a prostacyclin analogue, in pulmonary  
40  
41 arterial hypertension associated with connective tissue disease. *Chest* 2004;126:420–7.
- 42  
43  
44 41. Clements PJ, Tan M, McLaughlin VV, *et al.* The pulmonary arterial hypertension quality  
45  
46 enhancement research initiative: comparison of patients with idiopathic PAH to patients  
47  
48 with systemic sclerosis-associated PAH. *Ann Rheum Dis* 2012;71:249–52.
- 49  
50  
51 42. Avouac J, Kowal-Bielecka O, Pittrow D, *et al.*; EPOSS Group. Validation of the 6 min  
52  
53 walk test according to the OMERACT filter: a systematic literature review by the  
54  
55 EPOSS-OMERACT group. *Ann Rheum Dis* 2010; 69:1360–1363.
- 56  
57  
58  
59  
60

- 1  
2  
3  
4 43. Ahmed I, Sutton AJ, Riley RD. Assessment of publication bias, selection bias, and  
5  
6 unavailable data in meta-analyses using individual participant data: a database survey.  
7  
8 *BMJ* 2012;344:d7762.  
9
- 10  
11 44. Naeije R. The 6-min walk distance in pulmonary arterial hypertension: "Je t'aime, moi  
12  
13 non plus". *Chest* 2010;137:1258–60.  
14
- 15  
16 45. Benza RL, Miller DP, Gomberg-Maitland M, *et al.* Predicting survival in pulmonary  
17  
18 arterial hypertension: insights from the Registry to Evaluate Early and Long-Term  
19  
20 Pulmonary Arterial Hypertension Disease Management (REVEAL). *Circulation*  
21  
22 2010;122:164–72.  
23  
24
- 25  
26 46. Miyamoto S, Nagaya N, Satoh T, *et al.* Clinical correlates and prognostic significance of  
27  
28 six-minute walk test in patients with primary pulmonary hypertension. Comparison with  
29  
30 cardiopulmonary exercise testing. *Am J Respir Crit Care Med* 2000;161:487–92.  
31  
32
- 33  
34 47. Sitbon O, Humbert M, Nunes H, *et al.* Long-term intravenous epoprostenol infusion in  
35  
36 primary pulmonary hypertension: prognostic factors and survival. *J Am Coll Cardiol*  
37  
38 2002;40:780–8.  
39
- 40  
41 48. Groepenhoff H, Vonk-Noordegraaf A, Boonstra A, *et al.* Exercise testing to estimate  
42  
43 survival in pulmonary hypertension. *Med Sci Sports Exerc* 2008;40:1725–32.  
44
- 45  
46 49. Humbert M, Sitbon O, Chaouat A, *et al.* Survival in patients with idiopathic, familial,  
47  
48 and anorexigen-associated pulmonary arterial hypertension in the modern management  
49  
50 era. *Circulation* 2010;122:156–63.  
51
- 52  
53 50. Humbert M, Sitbon O, Yaïci A, *et al.* Survival in incident and prevalent cohorts of  
54  
55 patients with pulmonary arterial hypertension. *Eur Respir J* 2010;36:549–55.  
56
- 57  
58 51. Gilbert C, Brown MC, Cappelleri JC, *et al.* Estimating a minimally important difference  
59  
60

1  
2  
3  
4 in pulmonary arterial hypertension following treatment with sildenafil. *Chest*  
5  
6 2009;135:137–42.  
7  
8  
9  
10  
11  
12  
13  
14  
15  
16  
17  
18  
19  
20  
21  
22  
23  
24  
25  
26  
27  
28  
29  
30  
31  
32  
33  
34  
35  
36  
37  
38  
39  
40  
41  
42  
43  
44  
45  
46  
47  
48  
49  
50  
51  
52  
53  
54  
55  
56  
57  
58  
59  
60

For peer review only



## Figure legends

**Figure 1** Flow diagram summarising selection of studies evaluating treatments for patients with (a) all forms of pulmonary arterial hypertension (PAH) and (b) connective tissue disease-PAH. RCT, randomised controlled trial.

**Figure 2** Effects of individual pulmonary arterial hypertension (PAH) agents on 6-minute walk distance (6MWD) in patients with any form of PAH. ERA, endothelin receptor antagonist; PDE, phosphodiesterase; PGI<sub>2</sub>, prostacyclin; NA, not applicable.

**Figure 3** Effects of individual pulmonary arterial hypertension (PAH) agents on 6-minute walk distance (6MWD) in patients with PAH associated with connective tissue disease. ERA, endothelin receptor antagonist; PDE, phosphodiesterase; PGI<sub>2</sub>, prostacyclin; NA, not applicable. For single-arm studies, the mean changes from baseline are shown.

1  
2  
3  
4 **Pulmonary arterial hypertension associated with connective tissue disease:**  
5  
6 **meta-analysis of clinical trials**  
7  
8  
9

10 Masataka Kuwana,<sup>1</sup> Hiroshi Watanabe,<sup>2</sup> Nobushige Matsuoka,<sup>3</sup> Naonobu Sugiyama<sup>4</sup>  
11  
12

13  
14  
15  
16 <sup>1</sup>Division of Rheumatology, Department of Internal Medicine, Keio University School of  
17  
18 Medicine, Tokyo, Japan  
19

20  
21 <sup>2</sup>Department of Clinical Pharmacology and Therapeutics, Hamamatsu University School of  
22  
23 Medicine, Shizuoka, Japan  
24

25  
26 <sup>3</sup>Division of Clinical Statistics, Pfizer Japan Inc.  
27

28  
29 <sup>4</sup>Division of Medical Affairs, Pfizer Japan Inc.  
30  
31

32  
33 **Correspondence to** Masataka Kuwana  
34

35 Department of Internal Medicine, Division of Rheumatology, Keio University School of  
36  
37 Medicine, 35 Shinanomachi, Shinjuku-ku, Tokyo 160-8582, Japan.  
38

39  
40 TEL: 81-3-3350-3567; FAX: 81-3-3350-3567  
41

42  
43 E-mail: kuwanam@z5.keio.jp  
44  
45

46  
47 **Running head:** Pulmonary arterial hypertension associated with connective tissue disease  
48  
49  
50  
51  
52  
53  
54  
55  
56  
57  
58  
59  
60

## Abstract

**Objectives:** Few studies have focused on pulmonary arterial hypertension (PAH) associated with connective tissue diseases (CTDs). The optimal treatment for CTD-PAH has yet to be established. **Design:** Meta-analysis of data from evaluations of treatment for PAH generally (19 studies) and CTD-PAH specifically (9 studies) to compare the effects of pulmonary vasodilative PAH agents. MEDLINE, EMBASE, and BIOSIS were searched.

English-language full-text articles published between January 1990 and August 2012 were eligible. **Setting:** International. **Participants:** Patients with PAH generally ( $n=3073$ ) and CTD-PAH specifically ( $n=678$ ). **Primary outcome measure:** Exercise capacity (6-minute walk distance, 6MWD). **Results:** Patients with PAH (all forms) had mean age 32–55 years (women, 61–87%); CTD-PAH patients had mean age 45–55 years (women, 74–95%).

Overall estimate of mMean change in 6MWD from baseline (95%CI) for the active treatment group versus the control group in all PAH patients was 34.6 m (27.4 to 41.9 m). Pooled Mean-mean differences from the results for patients receiving placebo by subgroup of patients receiving phosphodiesterase (PDE)-5 inhibitors, endothelin receptor antagonists (ERAs), and prostacyclin (PGI<sub>2</sub>) analogues were 22.4–45.5 m, 39.5–44.2 m, and 12.4–64.9 m, respectively. Overall estimate of MMean difference between changes in 6MWD in CTD-PAH patients was 34.2 m (23.3 to 45.0 m). Pooled Mean-mean differences by subgroup of patients receiving PDE-5 inhibitors, ERAs, and PGI<sub>2</sub> analogues in CTD-PAH patients were 37.0–47.1 m, 14.1–21.7 m, and 21.0–108.0 m, respectively. ERAs were less effective in CTD-PAH patients than all form PAH patients: 14.1 m (–4.4 to 32.6 m) versus 39.5 m (19.5 to 59.6 m) for bosentan, and 21.7 m (2.2 to 41.3 m) versus 44.2 m (30.2 to 58.2 m)

1  
2  
3 for ambrisentan. **Conclusions:** All 3 types of PAH agent are effective. However, ERAs may  
4  
5 be a less effective choice against CTD-PAH; further studies are needed. Limitations include  
6  
7  
8 the limited number of studies for some agents and for CTD-PAH patients.  
9  
10  
11  
12  
13  
14  
15  
16  
17  
18  
19  
20  
21  
22  
23  
24  
25  
26  
27  
28  
29  
30  
31  
32  
33  
34  
35  
36  
37  
38  
39  
40  
41  
42  
43  
44  
45  
46  
47  
48  
49  
50  
51  
52  
53  
54  
55  
56  
57  
58  
59  
60

For peer review only

## Article summary

### Article focus

- Pulmonary arterial hypertension (PAH) is a progressive disease characterised by abnormally high blood pressure in the pulmonary arteries.
- Patients with PAH associated with connective tissue diseases (CTDs) such as systemic sclerosis (SSc) have a particularly poor prognosis.
- Few studies have focused on patients with CTD-PAH, so the optimal treatment for these patients is unclear.

### Key messages

- The effects of the phosphodiesterase-5 inhibitors sildenafil and tadalafil, and the prostacyclin analogue epoprostenol, are consistent in patients with CTD-PAH and in those with PAH generally.
- The endothelin receptor antagonists bosentan and ambrisentan may be less effective in patients with CTD-PAH than in those with PAH generally.

### Strengths and limitations of this study

- The meta-analysis used all currently available data from clinical studies on treatment for PAH.
- Few studies were identified for some PAH agents and for CTD-PAH patients.
- Study designs and patient background characteristics, including the percentages of patients with SSc-PAH, were inconsistent between studies.

## Introduction

Pulmonary hypertension is a heterogeneous condition with sustained elevation of pressure in the pulmonary arteries, and is defined as mean pulmonary artery pressure  $\geq 25$  mmHg at rest.<sup>1</sup> The most recent and widely accepted clinical classification of pulmonary hypertension is that proposed at the Fourth World Symposium on Pulmonary Hypertension at Dana Point in 2008.<sup>2</sup> It classifies pulmonary hypertension into 5 groups. Group 1 comprises pulmonary arterial hypertension (PAH), which includes idiopathic PAH, heritable PAH, drug- and toxin-induced PAH, PAH associated with various diseases, and persistent pulmonary hypertension of the newborn. Group 2 comprises pulmonary hypertension owing to left heart disease; group 3, pulmonary hypertension owing to lung diseases and/or hypoxia; group 4, chronic thromboembolic pulmonary hypertension; and group 5, pulmonary hypertension of unknown cause. In this classification of pulmonary hypertension, PAH is recognised as having an extremely poor prognosis and requires specific medical treatment.

Connective tissue disease (CTD) is the most common condition associated with PAH. Recent cohort studies have shown that most patients with PAH associated with CTD have systemic sclerosis (SSc).<sup>3,4</sup> In fact, the prevalence of PAH in patients with SSc is reported to be 7–12%.<sup>5,6</sup> Patients with SSc-PAH have poor prognosis compared with patients with idiopathic PAH.<sup>7</sup> Therefore, early and appropriate diagnosis and selection of the optimal treatment regimen are important for SSc-PAH, to improve the hemodynamics, exercise capacity, and eventually survival of patients.

The optimal treatment for PAH has not been established. However, there has been major progress in medical treatment for PAH in recent years. Several new agents with different

1  
2  
3 mechanisms have been introduced, including phosphodiesterase (PDE)-5 inhibitors (e.g. oral  
4 sildenafil and tadalafil), endothelin receptor antagonists (ERAs) (e.g. oral bosentan and  
5  
6 ambrisentan), and prostacyclin (PGI<sub>2</sub>) analogues (e.g. continuous intravenous epoprostenol).  
7  
8  
9  
10  
11 The introduction of these new agents is expected to contribute to the improvement of exercise  
12  
13 capacity, subjective symptoms, and quality of life, as well as the short- and long-term  
14  
15 survival of patients.  
16

17  
18 Although the efficacy and safety of these new agents have been shown in small- or  
19  
20 medium-scale randomised controlled trials (RCTs) and open-label trials, evidence from  
21  
22 large-scale comparative studies of these agents remains insufficient because PAH is a rare  
23  
24 disease. Therefore, to compare the new agents and establish a therapeutic strategy for PAH,  
25  
26 several systematic reviews and meta-analyses of available clinical study results have been  
27  
28 done.<sup>8-13</sup> However, most of these analyses include studies on all forms of PAH, and studies  
29  
30 that focus on CTD-PAH are limited. In fact, our literature search showed only one such  
31  
32 report: a meta-analysis by Avouac *et al.*,<sup>8</sup> which investigated the efficacy of oral PAH agents  
33  
34 mainly in patients with SSc.  
35  
36  
37  
38  
39

40 Therefore, in this meta-analysis of studies designed as RCTs and open-label, single-arm  
41  
42 trials, we aimed to evaluate the effect of each PAH agent on exercise capacity in patients with  
43  
44 CTD-PAH compared with patients with all forms of PAH. We chose 6-minute walk distance  
45  
46 (6MWD) as an endpoint because it was used as a primary endpoint in most previous  
47  
48 randomised studies of PAH agents.<sup>14</sup>  
49  
50  
51  
52  
53

## 54 **Methods**

55  
56  
57  
58  
59  
60

### *Eligibility criteria*

To evaluate the effects of 3 typical types of PAH agent, we included RCTs in which the following PAH agents were administered to patients with all forms of PAH.

- PDE-5 inhibitors: sildenafil and tadalafil
- ERAs: bosentan and ambrisentan
- PGI<sub>2</sub> analogues: epoprostenol, beraprost, iloprost, and treprostinil.

Because the number of RCTs in patients with CTD-PAH is limited, we also included open-label, single-arm trials evaluating the effects of PAH agents in patients with CTD-PAH.

We excluded reviews and non-interventional studies (e.g. case reports and observational studies [as opposed to RCTs](#)) were excluded. We included only principal studies and excluded [ad hoc analyses](#). Studies in which results for 6MWD were not reported were also excluded, [as were studies on pulmonary hypertension other than PAH](#).

### *Search strategy*

We searched MEDLINE, EMBASE, and BIOSIS for English-language full-text articles published between January 1990 and August 2012, using the key terms ‘pulmonary arterial hypertension’, ‘6 minute walk’, and the names of individual drugs. In addition to these key terms, we used the term ‘randomised controlled trial’ or ‘RCT’ to identify RCTs evaluating all forms of PAH, and ‘connective tissue disease’ or ‘CTD’ to identify studies evaluating CTD-PAH. The last search was run on 5 December 2012. Additional studies were identified through manual searching.

### *Primary endpoint*



1  
2  
3  
4 The primary outcome measure was the difference in mean change from baseline in 6MWD  
5  
6 between groups. However, for single-arm studies, the mean change from baseline was used as  
7  
8 the primary outcome measure.  
9

#### 10 11 12 13 *Data collection*

14  
15 Relevant data were extracted and reviewed by NM and NS. Data on study characteristics  
16  
17 (year and design), variables including PAH agents used, total patient numbers and the  
18  
19 percentage of CTD-PAH patients, and outcomes (mean difference, m and 95%CI, m or  
20  
21 standard error) were extracted.  
22  
23  
24  
25  
26  
27

#### 28 *Risk of bias*

29  
30 To determine the validity of the included studies, we assessed the risk of bias for each study  
31  
32 in terms of random sequence generation, allocation concealment, blinding, and other sources  
33  
34 of bias, as recommended by the Cochrane Collaboration. Each domain was judged to have  
35  
36 high, low, or unclear risk of bias. We did not detect clear publication bias, because the  
37  
38 number of included studies was small.  
39  
40  
41  
42  
43  
44

#### 45 *Statistical analysis*

46  
47 ~~We pooled outcomes using a random effects model by each PAH agent for all forms of PAH~~  
48 ~~and CTD-PAH.~~ We pooled outcomes by each PAH agent for all forms of PAH and for  
49  
50 CTD-PAH. We used a random effects model based on the DerSimonian–Laird method  
51  
52 because of known clinical and methodological heterogeneity (e.g. the various doses of each  
53  
54 PAH agent).  $I^2$  values were calculated as a measure of heterogeneity. Heterogeneity was  
55  
56  
57  
58  
59  
60

1  
2  
3  
4 assessed using the  $I^2$  statistic, which describes the percentage of variability in effect  
5  
6 estimates that is due to heterogeneity rather than sampling error (chance), and we considered  
7  
8  $I^2 \geq 75\%$  as representing considerable heterogeneity.  
9

## 10 11 12 13 **Results**

### 14 15 16 17 *Selection of studies*

18  
19  
20 A total of 196 articles were identified for evaluation of treatments for all forms of PAH. Of  
21  
22 these, 19 articles (reporting data from 3073 patients) met the eligibility criteria for  
23  
24 evaluations of treatments for all forms of PAH (3 articles for sildenafil,<sup>15-17</sup> 1 article for  
25  
26 tadalafil,<sup>18</sup> 4 articles for bosentan,<sup>19-22</sup> 1 article for ambrisentan,<sup>23</sup> 3 articles for  
27  
28 epoprostenol,<sup>24-26</sup> 1 article for beraprost,<sup>27</sup> 2 articles for iloprost,<sup>28,29</sup> and 4 articles for  
29  
30 treprostini<sup>30-33</sup>) (figure 1a). The main reasons for exclusion were that the article was a review  
31  
32 and that the article reported the results of a study that involved patients other than those with  
33  
34 PAH.  
35  
36  
37  
38

39  
40 For evaluation of treatments for CTD-PAH, a total of 269 articles were identified. Of these,  
41  
42 9 articles (reporting data from 678 patients) met the eligibility criteria for evaluations of  
43  
44 treatments for CTD-PAH (1 article for sildenafil,<sup>34</sup> 1 article for tadalafil,<sup>18</sup> 2 articles for  
45  
46 bosentan,<sup>35,36</sup> 2 articles for ambrisentan,<sup>37,38</sup> 1 article for epoprostenol,<sup>26</sup> 1 article for  
47  
48 beraprost,<sup>39</sup> and 1 article for treprostini<sup>40</sup>) (figure 1b). The main reasons for exclusion were  
49  
50 that the article was a review and that the article reported the results of a study that involved  
51  
52 patients other than those with CTD-PAH.  
53  
54  
55  
56  
57  
58  
59  
60

### *Characteristics and overview of the included studies*

Of the 19 studies on treatments for all forms of PAH included in this analysis (table 1), 15 were randomised, placebo-controlled, double-blind studies;<sup>15–23 27 28 30–33</sup> 3 were randomised, open-label studies comparing with conventional treatment;<sup>24–26</sup> and 1 was a randomised, open-label study evaluating the effects of iloprost when added to bosentan.<sup>29</sup> The observation period was either 12 or 16 weeks in most of the studies, with some exceptions (1 study each with 6- and 24-week observation periods,<sup>16 22</sup> and 2 studies with an 8-week observation period<sup>24 31</sup>). Of the placebo-controlled randomised comparative studies, 1 study of sildenafil was done in patients previously treated with epoprostenol;<sup>17</sup> 2 studies of iloprost, in patients previously treated with bosentan,<sup>28 29</sup> and 1 study of treprostinil, in patients previously treated with bosentan or sildenafil.<sup>32</sup>

Of the 9 studies on treatments for CTD-PAH included in this analysis (table 2), 5 were placebo-controlled, double-blind studies,<sup>18 34 35 37 40</sup> 1 was a randomised, open-label study comparing with conventional treatment,<sup>26</sup> and 3 were open-label, single-arm studies.<sup>36 38 39</sup> The observation period in these studies was 8–28 weeks. One study each evaluating bosentan<sup>36</sup> and epoprostenol<sup>26</sup> included only SSc-PAH patients.

### *Background of all PAH patients*

The background of all PAH patients, based on data from the 19 studies, can be summarised as follows (full data in supplementary table 1). Mean age was 32–55 years, and the percentage of women was 61–87%. In the studies of sildenafil,<sup>15–17</sup> tadalafil,<sup>18</sup> ambrisentan,<sup>23</sup> and beraprost,<sup>27</sup> most patients were classified according to World Health Organisation functional class (WHO-FC) as in WHO-FC II or III, with 1 study including only patients in

1  
2  
3  
4 WHO-FC II.<sup>22</sup> In contrast, in the studies of epoprostenol,<sup>24–26</sup> the percentage of patients in  
5  
6 WHO-FC IV was higher than that in studies of other agents. In the studies of iloprost, most  
7  
8 patients were in WHO-FC III.<sup>28 29</sup> In the studies of treprostinil, most patients were in  
9  
10 WHO-FC III in 3 studies<sup>30 32 33</sup> and in WHO-FC II in 1 study.<sup>31</sup> Baseline 6MWD was  
11  
12 226.6–434.5 m, and it was lower in the 3 studies of epoprostenol (226.6, 294.3, and  
13  
14 255.9 m)<sup>24–26</sup> compared with in studies on other agents. Therefore patients with more severe  
15  
16 disease were included in the studies of epoprostenol than in other studies. One study of  
17  
18 bosentan included only patients with Eisenmenger syndrome.<sup>21</sup>  
19  
20  
21  
22  
23  
24

#### 25 *Background of the subgroup of CTD-PAH patients*

26  
27 The background of patients with CTD-PAH, using data from 9 studies, can be summarised as  
28  
29 follows (full data in supplementary table 2). Mean age was 45–55 years, and the percentage  
30  
31 of women was 74–95%. In 1 study of tadalafil, there was no information on baseline 6MWD  
32  
33 or WHO-FC.<sup>18</sup> As for the distribution of patients according to WHO-FC, a study of beraprost  
34  
35 included more patients in WHO-FC II,<sup>39</sup> and a study of epoprostenol included more patients  
36  
37 in WHO-FC IV,<sup>26</sup> compared with studies of other agents.  
38  
39  
40  
41

42 In 5 studies in which information on underlying CTDs was available, SSc-PAH patients  
43  
44 accounted for 45–100% of all patients included. Their mean age was 51–55 years, and the  
45  
46 percentage of women was 74–90%.  
47  
48

49 In studies of bosentan<sup>36</sup> and epoprostenol<sup>26</sup> that included only SSc-PAH patients, baseline  
50  
51 6MWD was < 300 m, which was lower than that in studies of other agents. Therefore the  
52  
53 study of beraprost included more patients with relatively mild PAH, whereas the study of  
54  
55 epoprostenol included more patients with more severe disease.  
56  
57  
58  
59  
60

### Results of 6MWD

The actual values of the outcomes for each study are presented on the right sides of figures 2 and 3. We pooled the data, including those for non-approved doses, to evaluate the effect of each PAH agent on exercise capacity in patients with CTD-PAH compared with in patients with all forms of PAH.

### 6MWD in All PAH patients

The mean differences between changes in 6MWD compared with the control group are shown in figure 2 by each agent. Briefly With a random effects model, the pooled mean difference between changes in 6MWD (95%CI) was 45.5 m (95% confidence interval (CI) 32.9– to 58.1 m,  $I^2=50.1%$ ) for sildenafil, 22.4 m (95%CI 14.0– to 30.9 m,  $I^2=7.9%$ ) for tadalafil, 39.5 m (95%CI 19.5 to, 59.6 m,  $I^2=38.3%$ ) for bosentan, 44.2 m (95%CI 30.2 to, 58.2 m,  $I^2=0%$ ) for ambrisentan, 64.9 m (95%CI 20.4 to, 109.4 m,  $I^2=43.3%$ ) for epoprostenol, 25.1 m (95%CI 1.9; to 48.4 m,  $I^2=$  not applicable [NA]) for beraprost, 12.4 m (95%CI –21.9 to, 46.6 m,  $I^2=39.7%$ ) for iloprost, and 17.3 m (95%CI 6.1– to 28.4 m,  $I^2=29.4%$ ) for treprostinil. Numerical improvement in 6MWD was obtained in patients using each agent compared with those using the control agent. The pooled Mean-mean difference between changes in 6MWD from the control group was ranged from 12.4 to–64.9 m, and the overall estimate of total-mean difference (95%CI) combining data for all agents was 34.6 m (95%CI 27.4 to, 41.9 m,  $I^2=63.2%$ ). The ranges of Mean-mean difference from the effects of placebo by subgroup of patients receiving PDE-5 inhibitors, ERAs, and PGI<sub>2</sub> analogues were 22.4–45.5 m, 39.5–44.2 m, and 12.4–64.9 m, respectively. Considerable heterogeneity was

not observed.

### *6MWD in a subgroup of CTD-PAH patients*

In the subgroup of CTD-PAH patients, the mean differences between changes in 6MWD compared with the control group are shown in figure 3 by each agent. For single-arm studies, the mean changes from baseline are shown. With a random effects model Briefly, the pooled mean difference between changes in 6MWD (95%CI) was 47.1 m (95%CI 27.9 to; 66.3 m,  $I^2=0\%$ ) for sildenafil, 37.0 m (95%CI 19.0 to; 55.0 m,  $I^2=0\%$ ) for tadalafil, 14.1 m (95%CI -4.4 to; 32.6 m,  $I^2=0\%$ ) for bosentan, 21.7 m (95%CI 2.2 to; 41.3 m,  $I^2=0\%$ ) for ambrisentan, 108.0 m (95%CI 45.6 to; 170.4 m,  $I^2=NA$ ) for epoprostenol, 58.5 m (95%CI 21.4 to; 95.6 m,  $I^2=NA$ ) for beraprost, and 21.0 m (95%CI -6.9 to; 48.9 m,  $I^2=NA$ ) for treprostinil. Numerical improvement in 6MWD was obtained in patients using all agents compared with those using the control agent. The overall estimate of mean difference between changes in 6MWD (95%CI) in patients with CTD-PAH was 34.2 m (95%CI 23.3 to; 45.0 m,  $I^2=32.5\%$ ). The ranges of mean differences by subgroup of patients receiving PDE-5 inhibitors, ERAs, and PGI<sub>2</sub> analogues were 37.0–47.1 m, 14.1–21.7 m, and 21.0–108.0 m, respectively.

Considerable heterogeneity was not observed.

We did an additional sensitivity analysis excluding open-label single-arm studies for CTD-PAH patients only (supplementary figure). The overall estimate of mean difference between changes in 6MWD in patients with CTD-PAH was 37.2 m (95%CI 25.0 to 49.3 m,  $I^2=20.5\%$ ) and the ranges of mean differences by subgroup of patients receiving PDE-5 inhibitors, ERAs, and PGI<sub>2</sub> analogues were 37.0–47.1 m, 19.0–22.1 m, and 21.0–108.0 m, respectively.

### *Difference in exercise capacity between all PAH patients and CTD-PAH patients*

When the pooled mean differences between changes in 6MWD were compared between all PAH patients and each subgroup of CTD-PAH patients, no difference in exercise capacity was found between the patient groups for PDE-5 inhibitors (sildenafil and tadalafil). In contrast, for ERAs (bosentan and ambrisentan), the pooled mean values in CTD-PAH patients (bosentan, 14.1 m; ambrisentan, 21.7 m) were lower than the lower limit of 95%CI of the mean values in all PAH patients (bosentan, 19.5 to 59.6 m; ambrisentan, 30.2 to 58.2 m), suggesting that effects on exercise capacity may vary between patient groups. For PGI<sub>2</sub> (epoprostenol, beraprost, and treprostinil), no obvious trends were found between patient groups.

### *Risk of bias*

We rated risk of bias for each study (full data in supplementary table 3). In studies for all forms of PAH, none were at high risk of bias for random sequence generation or allocation concealment; however, the method of randomisation and allocation concealment were unclear (i.e. not reported) for 11 studies and 9 studies, respectively. Four studies were at high risk of bias for blinding because they were open-label studies. Three studies were at high risk for another source of bias (imbalance in missing data between groups,<sup>17</sup> imbalance in baseline 6MWD,<sup>25</sup> and early termination based on futility analysis<sup>29</sup>).

Of studies for CTD-PAH, 3 studies were at high risk of bias with respect to all domains because they were open-label, single-arm studies.<sup>36 38 39</sup> One study was at high risk of bias resulting from imbalance in baseline characteristics.<sup>35</sup> The remaining studies were judged to

1  
2  
3  
4 be not of high risk of bias in any of the domains.  
5  
6  
7

## 8 9 **Discussion**

10  
11  
12  
13 A finding of the present meta-analysis of 19 studies is that in combined patients with all  
14 forms of PAH, all agents increase 6MWD compared with the control group.<sup>15-33</sup> Likewise,  
15 the meta-analysis of 9 studies on CTD-PAH patients also showed an increase in 6MWD by  
16 all agents.<sup>18 26 34-40</sup> The finding that all agents increase 6MWD in all PAH patients is  
17 consistent with the results of the 5 previous systematic reviews and meta-analyses that  
18 evaluated the 3 types of agent (PDE-5 inhibitors, ERAs, and PGI<sub>2</sub> analogues).<sup>9-13</sup> To date,  
19 reports of meta-analyses that included patients with CTD-PAH including SSc-PAH are  
20 limited to 1 study that evaluated 3 oral agents (sildenafil, bosentan, and sitaxsentan) alone.<sup>8</sup>  
21  
22 The findings of this meta-analysis are important because patients with all PAH as well as a  
23 subgroup of CTD-PAH patients were included, and the effects of 3 types of agent, including  
24 intravenous preparations, were thoroughly evaluated. Our meta-analysis shows similar trends  
25 to the findings of Avouac *et al.*<sup>8</sup>  
26  
27  
28  
29  
30  
31  
32  
33  
34  
35  
36  
37  
38  
39  
40  
41

42 When the mean differences between changes in 6MWD were compared between all PAH  
43 patients and CTD-PAH patients, the effects of ERAs (bosentan and ambrisentan) on exercise  
44 tolerance may be less in CTD-PAH patients, whereas no difference in exercise capacity was  
45 found between patient groups for PDE-5 inhibitors and PGI<sub>2</sub> analogues. This result should be  
46 interpreted cautiously because recent data from registries have shown that 6MWD is  
47 significantly lower in patients with CTD-PAH than in those with idiopathic PAH,<sup>4 41</sup> and a  
48 systematic review has shown that 6MWD may be only partially valid in patients with  
49  
50  
51  
52  
53  
54  
55  
56  
57  
58  
59  
60



SSc-PAH.<sup>42</sup>

This analysis has several limitations. First, we could identify only a limited number of studies for some agents (1 study each for tadalafil, ambrisentan, and beraprost), and studies that included a subgroup of patients with CTD-PAH including SSc-PAH were scarce. Second, ideally data for patients with CTD-PAH should be compared with those for patients with other forms of PAH. However, there were insufficient data for forms of PAH other than CTD-PAH, so this analysis compared data for all PAH and CTD-PAH. Third, the study designs varied: some studies that included CTD-PAH patients were done in an open-label or single-arm, open-label manner, some having a short observation period (12 or 16 weeks) or using combination therapy. Of note, in studies of combination therapy, changes in 6MWD are expected to be smaller, because patients are already receiving PAH therapy at the start of the study. Patient background characteristics were also inconsistent between studies: patients were in various WHO FC classes and had various baseline 6MWD values, which can influence the effects of each agent, and some articles reported no such information. Moreover, the percentage of SSc-PAH patients in the study population also varied, which is a study limitation because there is a difference in treatment response between SSc and non-SSc patients, and patients with SSc-PAH have poor prognosis compared with patients with other CTD-PAH.<sup>47</sup> In this meta-analysis, the percentages of SSc-PAH patients were as follows: for sildenafil, 45% in the study by Badesch *et al.*;<sup>34</sup> for bosentan, 79% in the study by Denton *et al.*;<sup>35</sup> and 100% in the study by Launay *et al.*;<sup>36</sup> and for epoprostenol, 100% in the study by Badesch *et al.*<sup>26</sup> The percentage was unknown in the study of tadalafil by Galiè *et al.*;<sup>18</sup> in those of ambrisentan by Badesch *et al.*;<sup>37 38</sup> and in that of beraprost by Kunieda *et al.*<sup>39</sup> Patients with SSc-PAH were more frequently enrolled in studies for bosentan<sup>35 36</sup> than in the

1  
2  
3 sildenafil study.<sup>34</sup>–

4  
5  
6 It would have been interesting to do a sensitivity analysis with the data from SSc-PAH  
7  
8 patients only, but this is not possible for the following reasons. There are only two articles  
9  
10 (Launay *et al.*, 2010<sup>36</sup> and Badesch *et al.*, 2000<sup>26</sup>) from which data for the subpopulation of  
11 SSc-PAH patients can be extracted. A fourth Another limitation of our study was the inclusion  
12  
13 of data for non-approved, possibly subtherapeutic doses, which may have reduced the effects  
14  
15 of the PAH agents in some studies. Finally, there may be publication bias, so negative results  
16  
17 are likely to be unpublished.<sup>43</sup>

18  
19  
20  
21  
22  
23 Furthermore, the present analysis is intended to compare changes in 6MWD over a short  
24  
25 period of time, therefore whether the results are associated with patient survival remains  
26  
27 unclear. However, 6MWD is effective as an indicator of the severity of PAH.<sup>44</sup> Moreover, an  
28  
29 ongoing large-scale registry, the US Registry to Evaluate Early and Long-Term PAH Disease  
30  
31 Management (REVEAL), which aims to clarify the characteristics and prognosis of PAH  
32  
33 patients and the latest treatment for PAH, has shown that 6MWD is an independent predictor  
34  
35 that is significantly associated with 1-year survival.<sup>45</sup> Several other studies have also  
36  
37 confirmed its role as an independent predictor of prognosis.<sup>46–50</sup> In addition, investigators  
38  
39 who did a placebo-controlled randomised trial of the PDE-5 inhibitor sildenafil have recently  
40  
41 identified the minimum clinically meaningful changes in 6MWD, and concluded that it  
42  
43 would be a useful indicator to determine the efficacy of other PAH agents.<sup>51</sup>

44  
45  
46  
47  
48  
49 However, pharmacological treatment for PAH is shifting from monotherapy to  
50  
51 combination therapy, and it is expected that clinical studies investigating the efficacy of  
52  
53 combination therapy will increase. Therefore, it will be increasingly difficult to do a  
54  
55 meta-analysis that includes all the new studies to detect differences between PAH agents. The

1  
2  
3  
4 present analysis is meaningful because it included all available clinical study results to date,  
5  
6 and we hope that it contributes to the improvement of the treatment for PAH.  
7

8  
9 In conclusion, the present meta-analysis of studies that included CTD-PAH patients  
10  
11 showed an increase in 6MWD by all agents, that is, PDE-5 inhibitors, ERAs, and PGI<sub>2</sub>  
12  
13 analogues. Comparison of the mean differences between changes in 6MWD suggest that, for  
14  
15 bosentan and ambrisentan, the effects on exercise tolerance may differ depending on patient  
16  
17 group, whereas the PDE-5 inhibitors sildenafil and tadalafil and the PGI<sub>2</sub> analogue  
18  
19 epoprostenol show consistent effects regardless of the presence or absence of CTD. Further  
20  
21 studies are needed to clarify the clinical implications of these findings.  
22  
23  
24  
25  
26  
27

### 28 **Competing interests**

29  
30  
31  
32 MK has received research funding from Actelion Pharmaceuticals, GlaxoSmithKline,  
33  
34 Novartis and Pfizer, and lecture fees from Actelion Pharmaceuticals, Pfizer,  
35  
36 GlaxoSmithKline, Nippon Shinyaku, Mitsubishi Tanabe Pharma and Takeda Pharmaceuticals.  
37  
38 WH has received research funding from the Ministry of Health, Labour and Welfare of Japan,  
39  
40 Teika Seiyaku, Takeda Pharmaceuticals, Mochida, Pfizer, Asters and Daiichi Sankyo, and  
41  
42 lecture fees from Pfizer, Actelion, Novartis, Daiich Sankyo, GlaxoSmithKline and Nihon  
43  
44 Shinyaku. NM and NS are employees of Pfizer Japan Inc.  
45  
46  
47  
48  
49  
50  
51

### 52 **Contributors**

53  
54  
55  
56 N. Matsuoka, a statistician employed by Pfizer Japan, collected the data and did the statistical  
57  
58  
59  
60

1  
2  
3  
4 analyses described in this article.

5  
6 Dr N. Sugiyama, a rheumatologist employed by Pfizer Japan, reviewed the collection and  
7  
8 analyses of the data. He helped conceive and design the meta-analysis, interpret the results,  
9  
10 and revise the manuscript.

11  
12  
13 Dr M. Kuwana is directly responsible for the manuscript. He reviewed the data analyses and  
14  
15 drafted the manuscript, providing important intellectual content from the perspective of a  
16  
17 CTD-PAH specialist.

18  
19  
20 Dr H. Watanabe revised the manuscript critically for important intellectual content from the  
21  
22 perspective of a PAH specialist.  
23  
24  
25  
26  
27  
28  
29  
30  
31  
32  
33  
34  
35  
36  
37  
38  
39  
40  
41  
42  
43  
44  
45  
46  
47  
48  
49  
50  
51  
52  
53  
54  
55  
56  
57  
58  
59  
60

## References

1. Badesch DB, Champion HC, Sanchez MA, *et al.* Diagnosis and assessment of pulmonary arterial hypertension. *J Am Coll Cardiol* 2009;54:S55–66.
2. Simonneau G, Robbins IM, Beghetti M, *et al.* Updated clinical classification of pulmonary hypertension. *J Am Coll Cardiol* 2009;54:S43–54.
3. Condliffe R, Kiely DG, Peacock AJ, *et al.* Connective tissue disease-associated pulmonary hypertension in the modern treatment era. *Am J Respir Crit Care Med* 2009;179:151–7.
4. Chung L, Liu J, Parsons L, *et al.* Characterization of connective tissue disease-associated pulmonary arterial hypertension from REVEAL: identifying systemic sclerosis as a unique phenotype. *Chest* 2010;138:1383–94.
5. Hachulla E, Gressin V, Guilevin L, *et al.* Early detection of pulmonary arterial hypertension in systemic sclerosis: a French nationwide prospective multicenter study. *Arthritis Rheum* 2005;52:3792–800.
6. Mukerjee D, St George D, Coleiro B, *et al.* Prevalence and outcome in systemic sclerosis associated pulmonary arterial hypertension: application of a registry approach. *Ann Rheum Dis* 2003;62:1088–93.
7. Kawut SM, Taichman DB, Archer-Chicko CL, *et al.* Hemodynamics and survival in patients with pulmonary arterial hypertension related to systemic sclerosis. *Chest* 2003;123:344–50.
8. Avouac J, Wipff J, Kahan A, *et al.* Effects of oral treatments on exercise capacity in systemic sclerosis related pulmonary arterial hypertension: a meta-analysis of

- 1  
2  
3  
4 randomised controlled trials. *Ann Rheum Dis* 2008;67:808–14.
- 5  
6 9. Galiè N, Manes A, Negro L, *et al*. A meta-analysis of randomized controlled trials in  
7  
8 pulmonary arterial hypertension. *Eur Heart J* 2009;30:394–403.
- 9  
10  
11 10. Galiè N, Palazzini M, Manes A. Pulmonary arterial hypertension: from the kingdom of  
12  
13 the near-dead to multiple clinical trial meta-analyses. *Eur Heart J* 2010;31:2080–6.
- 14  
15  
16 11. Macchia A, Marchioli R, Tognoni G, *et al*. Systematic review of trials using vasodilators  
17  
18 in pulmonary arterial hypertension: why a new approach is needed. *Am Heart J*  
19  
20 2010;159:245–57.
- 21  
22  
23 12. He B, Zhang F, Li X, *et al*. Meta-analysis of randomized controlled trials on treatment of  
24  
25 pulmonary arterial hypertension. *Circ J* 2010;74:1458–64.
- 26  
27  
28 13. Ryerson CJ, Nayar S, Swiston JR, *et al*. Pharmacotherapy in pulmonary arterial  
29  
30 hypertension: a systematic review and meta-analysis. *Respir Res* 2010;11:12.
- 31  
32  
33 14. McLaughlin VV, Badesch DB, Delcroix M, *et al*. End points and clinical trial design in  
34  
35 pulmonary arterial hypertension. *J Am Coll Cardiol* 2009;54:S97–107.
- 36  
37  
38 15. Galiè N, Ghofrani HA, Torbicki A, *et al*. Sildenafil citrate therapy for pulmonary arterial  
39  
40 hypertension. *N Engl J Med* 2005;353:2148–57.
- 41  
42  
43 16. Singh TP, Rohit M, Grover A, *et al*. A randomized, placebo-controlled, double-blind,  
44  
45 crossover study to evaluate the efficacy of oral sildenafil therapy in severe pulmonary  
46  
47 artery hypertension. *Am Heart J* 2006;151:851.e1–5.
- 48  
49  
50 17. Simonneau G, Rubin LJ, Galiè N, *et al*. Addition of sildenafil to long-term intravenous  
51  
52 epoprostenol therapy in patients with pulmonary arterial hypertension: a randomized trial.  
53  
54  
55 *Ann Intern Med* 2008;149:521–30.
- 56  
57 18. Galiè N, Brundage BH, Ghofrani HA, *et al*. Tadalafil therapy for pulmonary arterial  
58  
59  
60

- 1  
2  
3  
4 hypertension. *Circulation* 2009;119:2894–903.  
5  
6 19. Channick RN, Simonneau G, Sitbon O, *et al.* Effects of the dual endothelin-receptor  
7  
8 antagonist bosentan in patients with pulmonary hypertension: a randomised placebo-  
9  
10 controlled study. *Lancet* 2001;358:1119–23.  
11  
12  
13 20. Rubin LJ, Badesch DB, Barst RJ, *et al.* Bosentan therapy for pulmonary arterial  
14  
15 hypertension. *N Engl J Med* 2002;346:896–903.  
16  
17  
18 21. Galiè N, Beghetti M, Gatzoulis MA, *et al.* Bosentan therapy in patients with  
19  
20 Eisenmenger syndrome: a multicenter, double-blind, randomized, placebo-controlled  
21  
22 study. *Circulation* 2006;114:48–54.  
23  
24  
25 22. Galiè N, Rubin LJ, Hoeper M, *et al.* Treatment of patients with mildly symptomatic  
26  
27 pulmonary arterial hypertension with bosentan (EARLY study): a double-blind,  
28  
29 randomised controlled trial. *Lancet* 2008;371:2093–100.  
30  
31  
32 23. Galiè N, Olschewski H, Oudiz RJ, *et al.* Ambrisentan for the treatment of pulmonary  
33  
34 arterial hypertension: results of the ambrisentan in pulmonary arterial hypertension,  
35  
36 randomized, double-blind, placebo-controlled, multicenter, efficacy (ARIES) study 1 and  
37  
38 2. *Circulation* 2008;117:3010–9.  
39  
40  
41  
42 24. Rubin LJ, Mendoza J, Hood M, *et al.* Treatment of primary pulmonary hypertension with  
43  
44 continuous intravenous prostacyclin (epoprostenol). Results of a randomized trial. *Ann*  
45  
46 *Intern Med* 1990;112:485–91.  
47  
48  
49 25. Barst RJ, Rubin LJ, Long WA, *et al.* A comparison of continuous intravenous  
50  
51 epoprostenol (prostacyclin) with conventional therapy for primary pulmonary  
52  
53 hypertension. The Primary Pulmonary Hypertension Study Group. *N Engl J Med*  
54  
55 1996;334:296–302.  
56  
57  
58  
59  
60

- 1  
2  
3  
4 26. Badesch DB, Tapson VF, McGoon MD, *et al.* Continuous intravenous epoprostenol for  
5  
6 pulmonary hypertension due to the scleroderma spectrum of disease. A randomized,  
7  
8 controlled trial. *Ann Intern Med* 2000;132:425–34.  
9
- 10  
11 27. Galiè N, Humbert M, Vachiéry JL, *et al.* Effects of beraprost sodium, an oral  
12  
13 prostacyclin analogue, in patients with pulmonary arterial hypertension: a randomized,  
14  
15 double-blind, placebo-controlled trial. *J Am Coll Cardiol* 2002;39:1496–502.  
16
- 17  
18 28. McLaughlin VV, Oudiz RJ, Frost A, *et al.* Randomized study of adding inhaled iloprost  
19  
20 to existing bosentan in pulmonary arterial hypertension. *Am J Respir Crit Care Med*  
21  
22 2006;174:1257–63.  
23
- 24  
25 29. Hoeper MM, Leuchte H, Halank M, *et al.* Combining inhaled iloprost with bosentan in  
26  
27 patients with idiopathic pulmonary arterial hypertension. *Eur Respir J* 2006;28:691–4.  
28
- 29  
30 30. Simonneau G, Barst RJ, Galiè N, *et al.* Continuous subcutaneous infusion of treprostinil,  
31  
32 a prostacyclin analogue, in patients with pulmonary arterial hypertension: a double-blind,  
33  
34 randomized, placebo-controlled trial. *Am J Respir Crit Care Med* 2002;165:800–4.  
35
- 36  
37 31. McLaughlin VV, Gaine SP, Barst RJ, *et al.* Efficacy and safety of treprostinil: an  
38  
39 epoprostenol analog for primary pulmonary hypertension. *J Cardiovasc Pharmacol*  
40  
41 2003;41:293–9.  
42
- 43  
44 32. McLaughlin VV, Benza RL, Rubin LJ, *et al.* Addition of inhaled treprostinil to oral  
45  
46 therapy for pulmonary arterial hypertension. *J Am Coll Cardiol* 2010;55:1915–22.  
47
- 48  
49 33. Hiremath J, Thanikachalam S, Parikh K, *et al.* Exercise improvement and plasma  
50  
51 biomarker changes with intravenous treprostinil therapy for pulmonary arterial  
52  
53 hypertension: a placebo-controlled trial. *J Heart Lung Transplant* 2010;29:137–49.  
54
- 55  
56 34. Badesch DB, Hill NS, Burgess G, *et al.* Sildenafil for pulmonary arterial hypertension  
57  
58



- 1  
2  
3 associated with connective tissue disease. *J Rheumatol* 2007;34:2417–22.
- 4  
5  
6 35. Denton CP, Humbert M, Rubin L, *et al.* Bosentan treatment for pulmonary arterial  
7  
8 hypertension related to connective tissue disease: a subgroup analysis of the pivotal  
9  
10 clinical trials and their open-label extensions. *Ann Rheum Dis* 2006;65:1336–40.
- 11  
12  
13 36. Launay D, Sitbon O, Le Pavec J, *et al.* Long-term outcome of systemic  
14  
15 sclerosis-associated pulmonary arterial hypertension treated with bosentan as first-line  
16  
17 monotherapy followed or not by the addition of prostanoids or sildenafil. *Rheumatology*  
18  
19 2010;49:490–500.
- 20  
21  
22 37. Badesch DB. Ambrisentan therapy for pulmonary arterial hypertension: a comparison by  
23  
24 PAH etiology. *Chest* 2007;slide presentations:488S.
- 25  
26  
27 38. Badesch DB, Feldman J, Keogh A, *et al.* ARIES-3: ambrisentan therapy in a diverse  
28  
29 population of patients with pulmonary hypertension. *Cardiovasc Ther* 2012;30:93–9.
- 30  
31  
32 39. Kunieda T, Nakanishi N, Matsubara H, *et al.* Effects of long-acting beraprost sodium  
33  
34 (TRK-100STP) in Japanese patients with pulmonary arterial hypertension. *Int Heart J*  
35  
36 2009;50:513–29.
- 37  
38  
39 40. Oudiz R, Schilz RJ, Barst RJ, *et al.* Treprostinil, a prostacyclin analogue, in pulmonary  
40  
41 arterial hypertension associated with connective tissue disease. *Chest* 2004;126:420–7.
- 42  
43  
44 41. Clements PJ, Tan M, McLaughlin VV, *et al.* The pulmonary arterial hypertension quality  
45  
46 enhancement research initiative: comparison of patients with idiopathic PAH to patients  
47  
48 with systemic sclerosis-associated PAH. *Ann Rheum Dis* 2012;71:249–52.
- 49  
50  
51 42. Avouac J, Kowal-Bielecka O, Pittrow D, *et al.*; EPOSS Group. Validation of the 6 min  
52  
53 walk test according to the OMERACT filter: a systematic literature review by the  
54  
55 EPOSS-OMERACT group. *Ann Rheum Dis* 2010; 69:1360–1363.
- 56  
57  
58  
59  
60

- 1  
2  
3  
4 43. Ahmed I, Sutton AJ, Riley RD. Assessment of publication bias, selection bias, and  
5  
6 unavailable data in meta-analyses using individual participant data: a database survey.  
7  
8 *BMJ* 2012;344:d7762.  
9
- 10  
11 44. Naeije R. The 6-min walk distance in pulmonary arterial hypertension: "Je t'aime, moi  
12  
13 non plus". *Chest* 2010;137:1258–60.  
14
- 15  
16 45. Benza RL, Miller DP, Gomberg-Maitland M, *et al.* Predicting survival in pulmonary  
17  
18 arterial hypertension: insights from the Registry to Evaluate Early and Long-Term  
19  
20 Pulmonary Arterial Hypertension Disease Management (REVEAL). *Circulation*  
21  
22 2010;122:164–72.  
23  
24
- 25  
26 46. Miyamoto S, Nagaya N, Satoh T, *et al.* Clinical correlates and prognostic significance of  
27  
28 six-minute walk test in patients with primary pulmonary hypertension. Comparison with  
29  
30 cardiopulmonary exercise testing. *Am J Respir Crit Care Med* 2000;161:487–92.  
31  
32
- 33  
34 47. Sitbon O, Humbert M, Nunes H, *et al.* Long-term intravenous epoprostenol infusion in  
35  
36 primary pulmonary hypertension: prognostic factors and survival. *J Am Coll Cardiol*  
37  
38 2002;40:780–8.  
39
- 40  
41 48. Groepenhoff H, Vonk-Noordegraaf A, Boonstra A, *et al.* Exercise testing to estimate  
42  
43 survival in pulmonary hypertension. *Med Sci Sports Exerc* 2008;40:1725–32.  
44
- 45  
46 49. Humbert M, Sitbon O, Chaouat A, *et al.* Survival in patients with idiopathic, familial,  
47  
48 and anorexigen-associated pulmonary arterial hypertension in the modern management  
49  
50 era. *Circulation* 2010;122:156–63.  
51
- 52  
53 50. Humbert M, Sitbon O, Yaïci A, *et al.* Survival in incident and prevalent cohorts of  
54  
55 patients with pulmonary arterial hypertension. *Eur Respir J* 2010;36:549–55.  
56
- 57  
58 51. Gilbert C, Brown MC, Cappelleri JC, *et al.* Estimating a minimally important difference  
59  
60

1  
2  
3  
4  
5  
6  
7  
8  
9  
10  
11  
12  
13  
14  
15  
16  
17  
18  
19  
20  
21  
22  
23  
24  
25  
26  
27  
28  
29  
30  
31  
32  
33  
34  
35  
36  
37  
38  
39  
40  
41  
42  
43  
44  
45  
46  
47  
48  
49  
50  
51  
52  
53  
54  
55  
56  
57  
58  
59  
60

in pulmonary arterial hypertension following treatment with sildenafil. *Chest*  
2009;135:137–42.

For peer review only

## Figure legends

**Figure 1** Flow diagram summarising selection of studies evaluating treatments for patients with (a) all forms of pulmonary arterial hypertension (PAH) and (b) connective tissue disease-PAH. RCT, randomised controlled trial.

**Figure 2** Effects of individual pulmonary arterial hypertension (PAH) agents on 6-minute walk distance (6MWD) in patients with any form of PAH. ERA, endothelin receptor antagonist; PDE, phosphodiesterase; PGI<sub>2</sub>, prostacyclin; NA, not applicable.

**Figure 3** Effects of individual pulmonary arterial hypertension (PAH) agents on 6-minute walk distance (6MWD) in patients with PAH associated with connective tissue disease. ERA, endothelin receptor antagonist; PDE, phosphodiesterase; PGI<sub>2</sub>, prostacyclin; NA, not applicable. For single-arm studies, the mean changes from baseline are shown.

**Table 1** Summary of included studies evaluating treatment with PAH agents in patients with all forms of PAH

| Source (official acronym)                            | PAH agent  | No. of patients | No. (%) of CTD-PAH patients | Study design | Intervention                                                                                                                    | Control                                           | Period (weeks) | Results for CTD-PAH                                     |
|------------------------------------------------------|------------|-----------------|-----------------------------|--------------|---------------------------------------------------------------------------------------------------------------------------------|---------------------------------------------------|----------------|---------------------------------------------------------|
| Galiè <i>et al.</i> (2005) <sup>15</sup> (SUPER-1)   | Sildenafil | 278             | 84 (30)                     | RCT, DB      | 20 mg × 3/day, 40 mg × 3/day, 80 mg × 3/day                                                                                     | Placebo                                           | 12             | Available in Badesch <i>et al.</i> (2007) <sup>34</sup> |
| Singh <i>et al.</i> (2006) <sup>16</sup>             | Sildenafil | 20              | 0                           | RCT, DB      | 25 mg on first day, then if no hypotension, 100 mg × 3/day                                                                      | Placebo                                           | 6              | None                                                    |
| Simonneau <i>et al.</i> (2008) <sup>17</sup> (PACES) | Sildenafil | 267             | 55 (21)                     | RCT, DB      | 20 mg × 3/day, titrated to 40 mg and 80 mg × 3/day, as tolerated, at 4-week intervals on background treatment with epoprostenol | Placebo on background treatment with epoprostenol | 16             | None                                                    |
| Galiè <i>et al.</i> (2009) <sup>18</sup> (PHIRST)    | Tadalafil  | 405             | 95 (24)                     | RCT, DB      | 2.5 mg, 10 mg, 20 mg, 40 mg                                                                                                     | Placebo                                           | 16             | Available in this article                               |
| Channick <i>et al.</i> (2001) <sup>19</sup>          | Bosentan   | 32              | 5 (16)                      | RCT, DB      | 62.5 mg × 2/day for 4 weeks, then 125 mg × 2/day                                                                                | Placebo                                           | 12             | Available in Denton <i>et al.</i> (2006) <sup>35</sup>  |
| Rubin <i>et al.</i> (2002) <sup>20</sup> (BREATHE-1) | Bosentan   | 213             | 63 (30)                     | RCT, DB      | 62.5 mg × 2/day for 4 weeks, then 125 mg or 250 mg × 2/day                                                                      | Placebo                                           | 16             | Available in Denton <i>et al.</i> (2006) <sup>35</sup>  |
| Galiè <i>et al.</i> (2006) <sup>21</sup>             | Bosentan   | 54              | 0                           | RCT, DB      | 62.5 mg × 2/day for                                                                                                             | Placebo                                           | 16             | None                                                    |

| Source (official acronym)                           | PAH agent    | No. of patients | No. (%) of CTD-PAH patients | Study design    | Intervention                                                                | Control              | Period (weeks) | Results for CTD-PAH                       |
|-----------------------------------------------------|--------------|-----------------|-----------------------------|-----------------|-----------------------------------------------------------------------------|----------------------|----------------|-------------------------------------------|
| (BREATHE-5)                                         |              |                 |                             |                 | 4 weeks, then 125 mg × 2/day                                                |                      |                |                                           |
| Galiè <i>et al.</i> (2008) <sup>22</sup> (EARLY)    | Bosentan     | 185             | 33 (18)                     | RCT, DB         | 62.5 mg × 2/day for 4 weeks, then 125 mg × 2/day                            | Placebo              | 24             | None                                      |
| Galiè <i>et al.</i> (2008) <sup>23</sup> (ARIES)    | Ambrisentan  | 393             | 124 (32)                    | RCT, DB         | 2.5 mg, 5 mg, 10 mg                                                         | Placebo              | 12             | Available in Badesch (2007) <sup>37</sup> |
| Rubin <i>et al.</i> (1990) <sup>24</sup>            | Epoprostenol | 23              | 0                           | RCT, open-label | Initial dosage of 1–2 ng/kg/min, then titrated to an optimal dose           | Conventional therapy | 8              | None                                      |
| Barst <i>et al.</i> (1996) <sup>25</sup>            | Epoprostenol | 81              | 0                           | RCT, open-label | Initial dosage of 2 ng/kg/min, then titrated to optimal dosage              | Conventional therapy | 12             | None                                      |
| Badesch <i>et al.</i> (2000) <sup>26</sup>          | Epoprostenol | 111             | 111 (100)                   | RCT, open-label | Dosage established according to signs and symptoms from an initial low dose | Conventional therapy | 12             | Available in this article                 |
| Galiè <i>et al.</i> (2002) <sup>27</sup> (ALPHABET) | Beraprost    | 130             | 13 (10)                     | RCT, DB         | 20 mg × 4/day for first week, then titrated to 120 mg ×                     | Placebo              | 12             | None                                      |

| Source (official acronym)                            | PAH agent        | No. of patients | No. (%) of CTD-PAH patients | Study design    | Intervention                                                                            | Control                                                        | Period (weeks) | Results for CTD-PAH                                   |
|------------------------------------------------------|------------------|-----------------|-----------------------------|-----------------|-----------------------------------------------------------------------------------------|----------------------------------------------------------------|----------------|-------------------------------------------------------|
| McLaughlin <i>et al.</i> (2006) <sup>28</sup> (STEP) | Inhaled iloprost | 67              | NR                          | RCT, DB         | 4/day<br>5 mg on background treatment with bosentan (125 mg × 2/day)                    | Placebo on background treatment with bosentan (125 mg × 2/day) | 12             | None                                                  |
| Hoeper <i>et al.</i> (2006) <sup>29</sup> (COMBI)    | Inhaled iloprost | 40              | 0                           | RCT, open-label | 5 mg on background treatment with bosentan (125 mg × 2/day)                             | Placebo on background treatment with bosentan (125 mg × 2/day) | 12             | None                                                  |
| Simonneau <i>et al.</i> (2002) <sup>30</sup>         | Treprostinil     | 469             | 90 (19)                     | RCT, DB         | Initial dosage of 1.25 ng/kg/min, then titrated to maximum dosage of 22.5 ng/kg/min     | Placebo                                                        | 12             | None                                                  |
| McLaughlin <i>et al.</i> (2003) <sup>31</sup>        | Treprostinil     | 26              | 0                           | RCT, DB         | Initial dosage of 2.5 or 5.0 ng/kg/min, then titrated to maximum dosage of 20 ng/kg/min | Placebo                                                        | 8              | Available in Oudiz <i>et al.</i> (2004) <sup>40</sup> |
| McLaughlin <i>et al.</i>                             | Treprostinil     | 235             | 0                           | RCT, DB         | Initiated at 3 breaths                                                                  | Placebo                                                        | 12             | None                                                  |

3

| Source (official acronym)                   | PAH agent    | No. of patients | No. (%) of CTD-PAH patients | Study design | Intervention                                                                                          | Control | Period (weeks) | Results for CTD-PAH |
|---------------------------------------------|--------------|-----------------|-----------------------------|--------------|-------------------------------------------------------------------------------------------------------|---------|----------------|---------------------|
| (2010) <sup>32</sup>                        |              |                 |                             |              | (18 mg)/inhalation, then titrated to maximum dosage of 9 breaths (54 mg) at each of the 4 daily doses |         |                |                     |
| Hiremath <i>et al.</i> (2010) <sup>33</sup> | Treprostinil | 44              | 2 (5)                       | RCT, DB      | Initial dose of 4 ng/kg/min, then titrated to maximum dose of 100 ng/kg/min                           | Placebo | 12             | None                |

CTD, connective tissue disease; DB, double-blind; NR, not reported; PAH, pulmonary arterial hypertension; RCT, randomised controlled trial.



**Table 2** Summary of included studies evaluating treatment with PAH agents in patients with CTD-PAH

| Source (official acronym)                            | PAH agent    | No. of CTD-PAH patients | No. (%) of SSc-PAH patients | Study design           | Intervention                                                             | Control              | Period (weeks) |
|------------------------------------------------------|--------------|-------------------------|-----------------------------|------------------------|--------------------------------------------------------------------------|----------------------|----------------|
| Badesch <i>et al.</i> (2007) <sup>34</sup> (SUPER-1) | Sildenafil   | 84                      | 38 (45)                     | RCT, DB                | 20 mg × 3/day, 40 mg × 3/day, 80 mg × 3/day                              | Placebo              | 12             |
| Galiè <i>et al.</i> (2009) <sup>18</sup> (PHIRST)    | Tadalafil    | 95                      | NR                          | RCT, DB                | 2.5 mg, 10 mg, 20 mg, 40 mg                                              | Placebo              | 16             |
| Denton <i>et al.</i> (2006) <sup>35</sup>            | Bosentan     | 66                      | 52 (79)                     | RCT, DB                | 62.5 mg × 2/day for 4 weeks, then 125 or 250 mg × 2/day                  | Placebo              | 12 or 16       |
| Launay <i>et al.</i> (2010) <sup>36</sup>            | Bosentan     | 49                      | 49 (100)                    | Single-arm, open-label | 62.5 mg × 2/day for 4 weeks, then 125 or 250 mg × 2/day                  | None                 | 28             |
| Badesch (2007) <sup>37</sup> (ARIES)                 | Ambrisentan  | 124                     | NR                          | RCT, DB                | 2.5 mg, 5 mg, 10 mg                                                      | Placebo              | 12             |
| Badesch <i>et al.</i> (2012) <sup>38</sup> (ARIES-3) | Ambrisentan  | 40                      | NR                          | Single-arm, open-label | 5 mg                                                                     | None                 | 24             |
| Badesch <i>et al.</i> (2000) <sup>26</sup>           | Epoprostenol | 111                     | 111 (100)                   | RCT, open-label        | Dosage established according to signs and symptoms from initial low dose | Conventional therapy | 12             |
| Kunieda <i>et al.</i> (2009) <sup>39</sup>           | Beraprost    | 19                      | NR                          | Single-arm, open-label | Initial dose of 120 mg/day, then titrated to maximum dose of 360 mg/day  | None                 | 12             |
| Oudiz <i>et al.</i> (2004) <sup>40</sup>             | Treprostinil | 90                      | 45 (50)                     | RCT, DB                | Initial dosage of 2.5 or 5.0 ng/kg/min, then titrated to                 | Placebo              | 8              |

| Source (official acronym) | PAH agent | No. of<br>CTD-PAH<br>patients | No. (%)<br>of<br>SSc-PAH<br>patients | Study design | Intervention                      | Control | Period<br>(weeks) |
|---------------------------|-----------|-------------------------------|--------------------------------------|--------------|-----------------------------------|---------|-------------------|
|                           |           |                               |                                      |              | maximum dosage of<br>20 ng/kg/min |         |                   |

CTD, connective tissue disease; DB, double-blind; NR, not reported; PAH, pulmonary arterial hypertension; RCT, randomised controlled trial; SSc, systemic sclerosis.

Figure 1a



Figure 1b

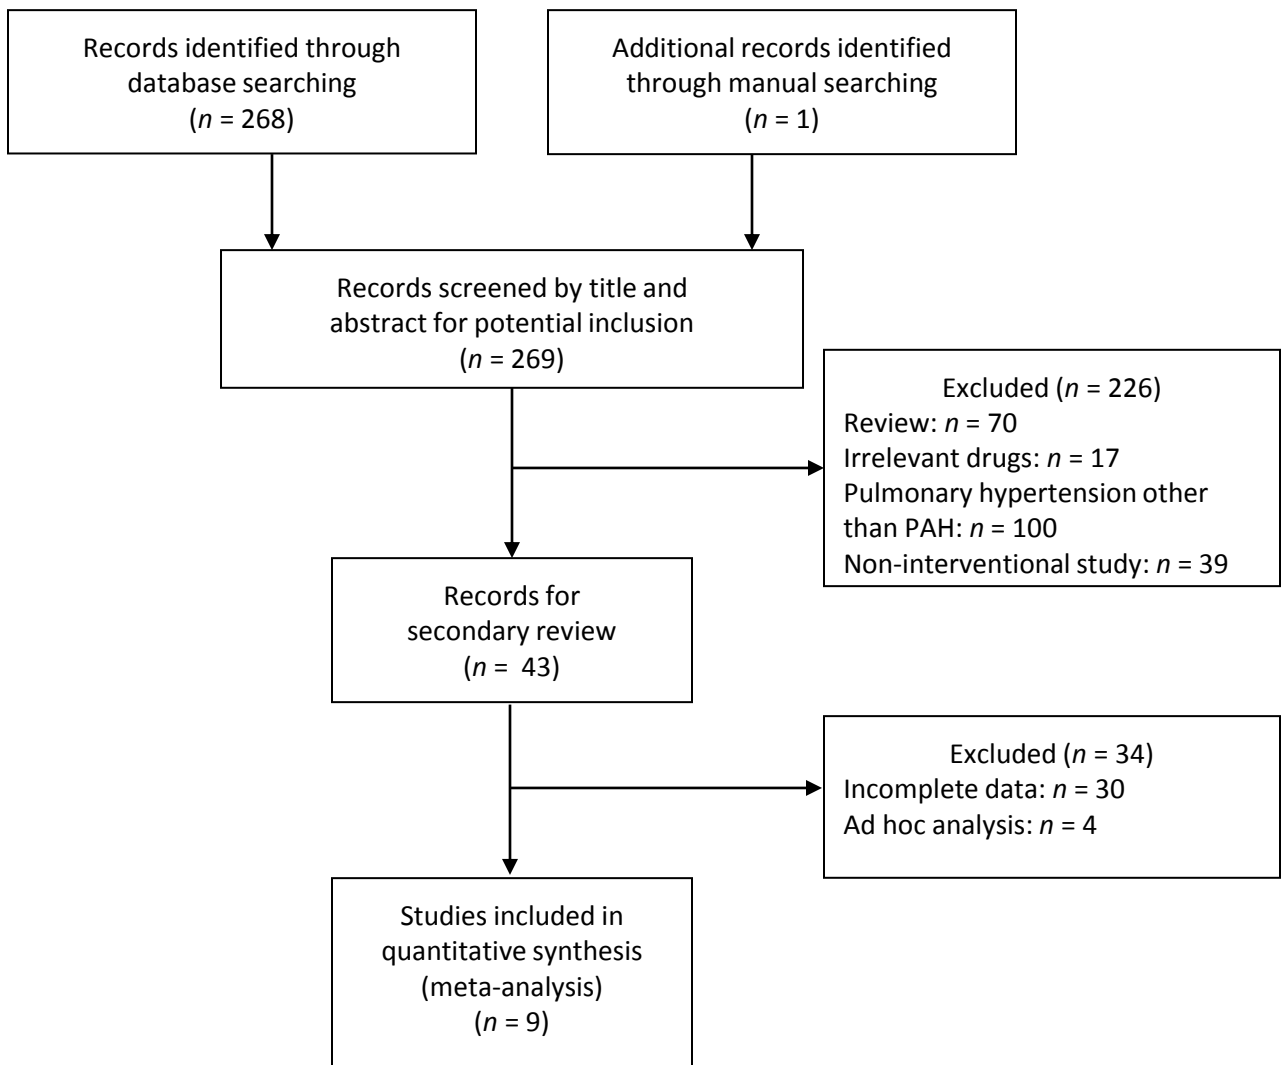

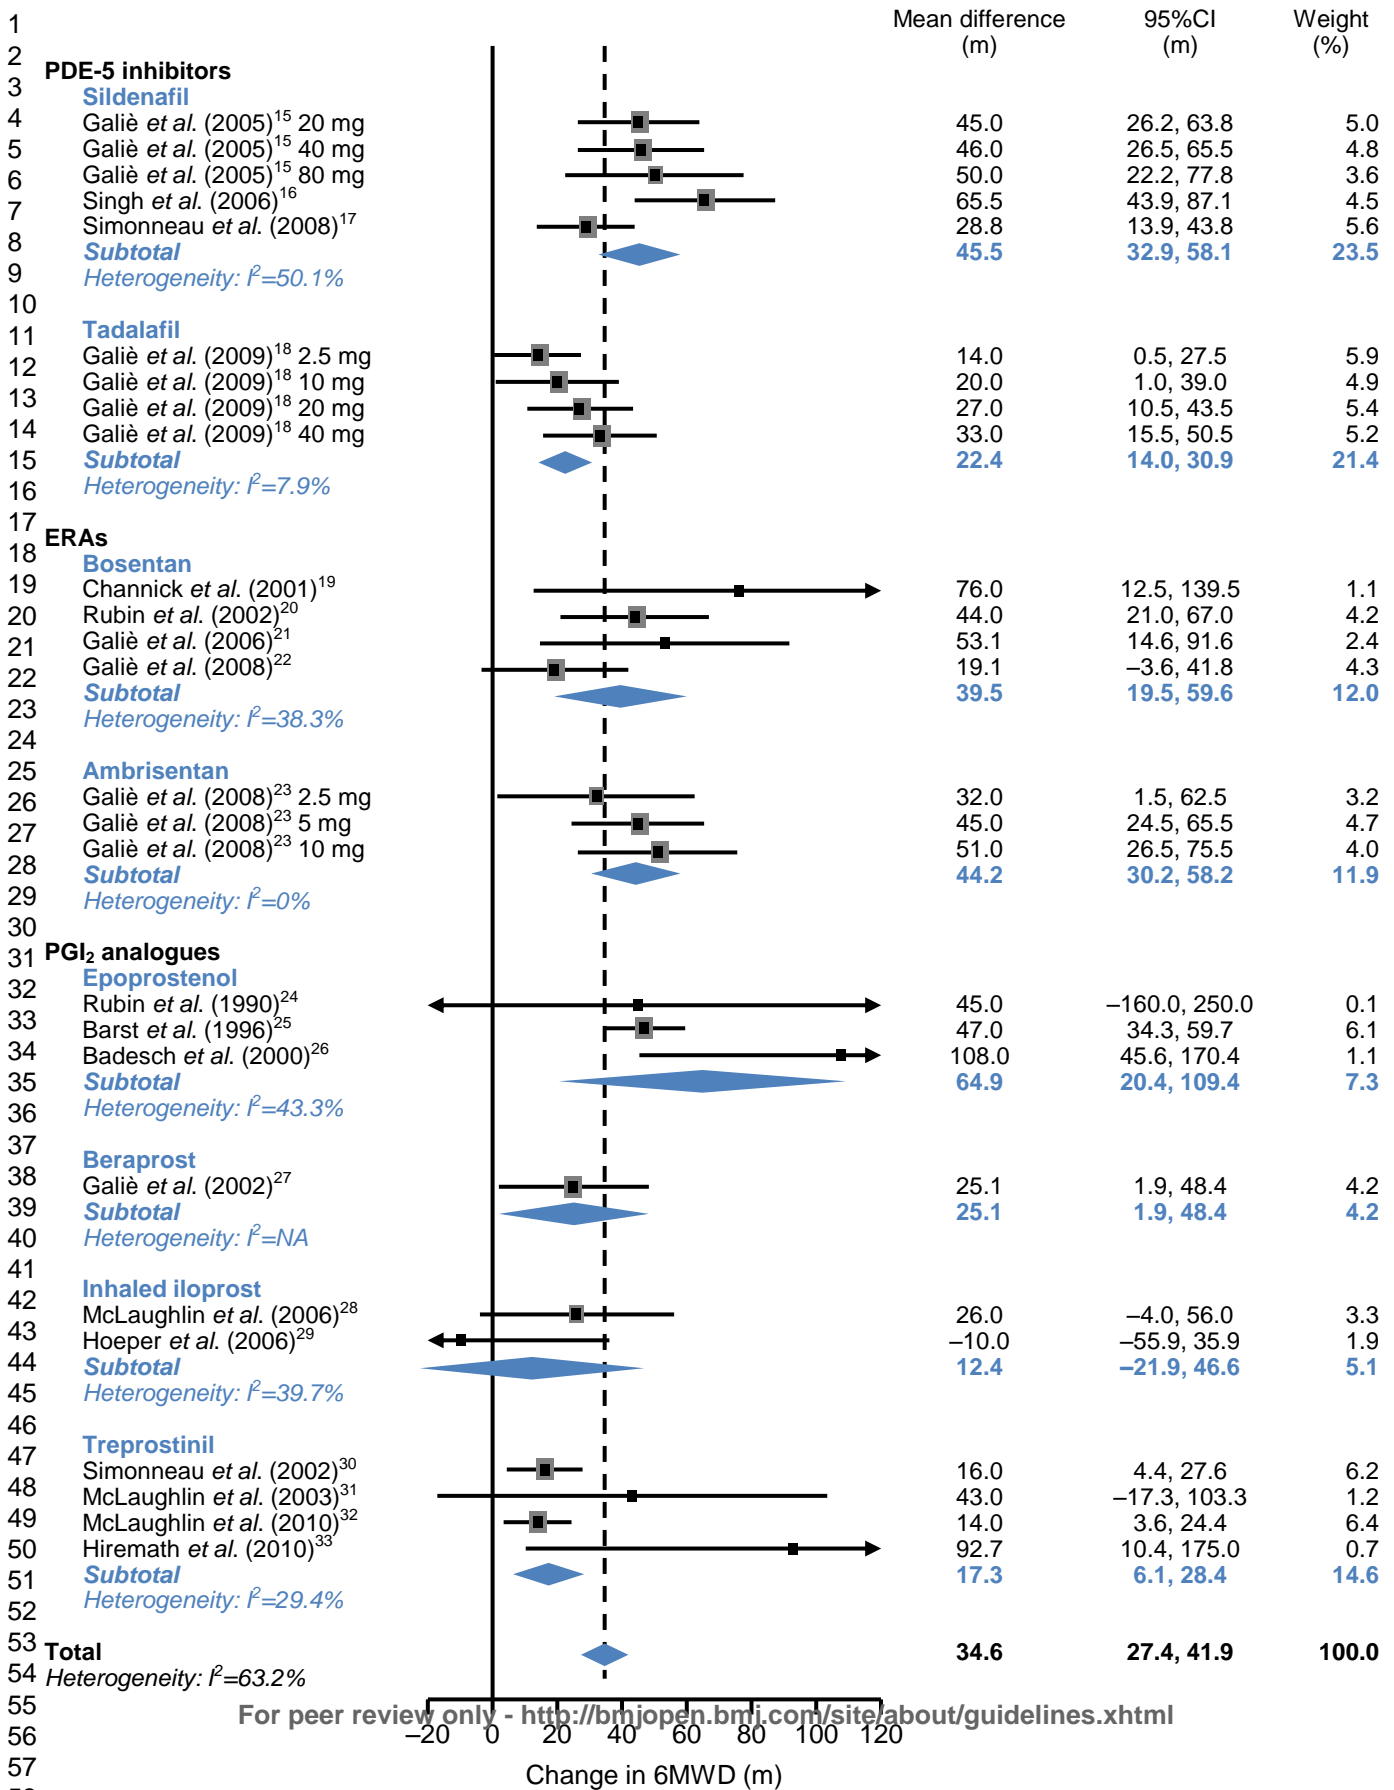

Figure 3

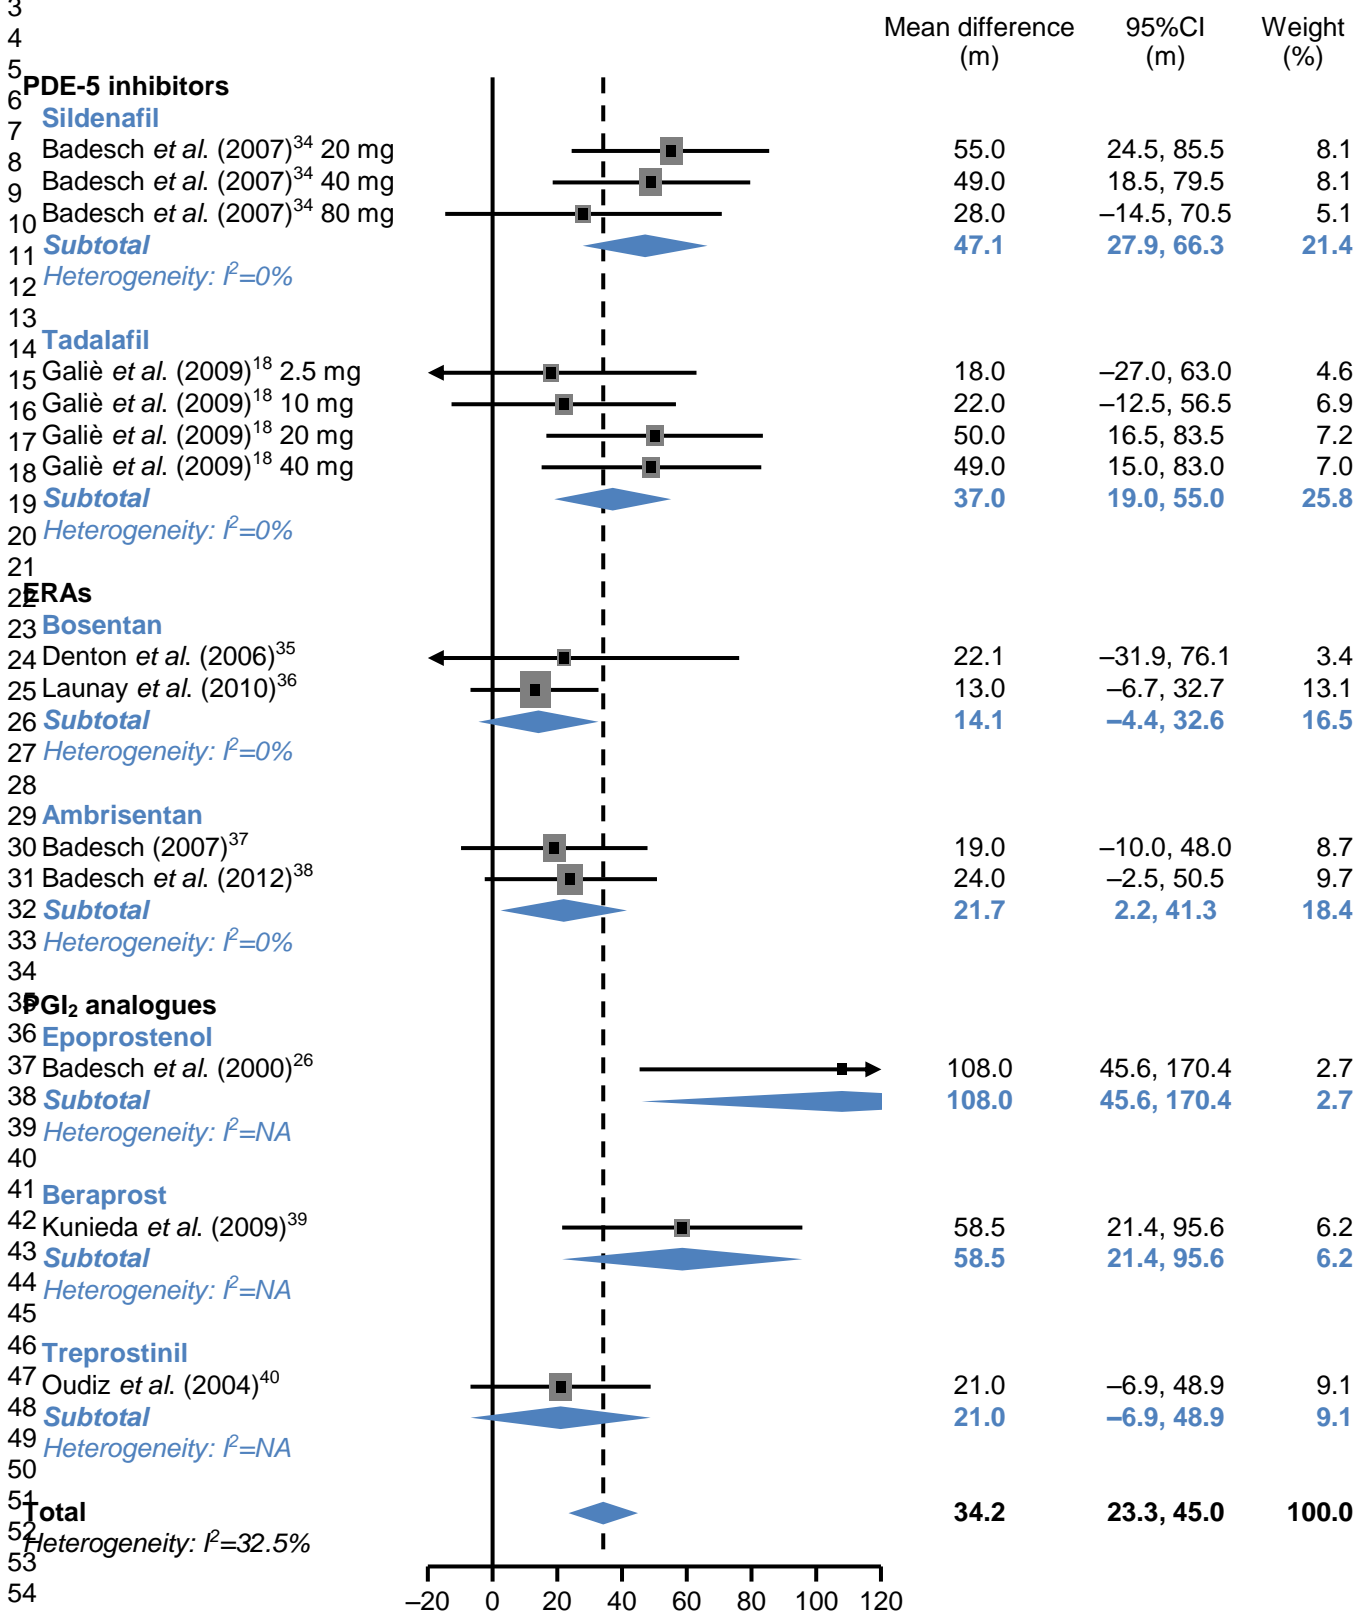

**Supplementary table 1** Baseline characteristics of patients with all forms of PAH

| Source                                           | PAH agent           | Female, <i>n</i><br>(%) | Mean age<br>(years) | Mean weight<br>(kg) | WHO functional class, <i>n</i> (%) |              |             |            | Mean baseline<br>6MWD (m) | Mean PAP<br>(mmHg) |
|--------------------------------------------------|---------------------|-------------------------|---------------------|---------------------|------------------------------------|--------------|-------------|------------|---------------------------|--------------------|
|                                                  |                     |                         |                     |                     | I                                  | II           | III         | IV         |                           |                    |
| Galiè <i>et al.</i> (2005) <sup>15</sup>         | Sildenafil          | 209 (76)                | 49                  | 72.7                | 1<br>(1)                           | 107<br>(39)  | 160<br>(58) | 9<br>(3)   | 343.7                     | 52.8               |
| Singh <i>et al.</i> (2006) <sup>16</sup>         | Sildenafil          | 15 (75)                 | NR                  | NR                  | 0                                  | 8 (40)       | 11 (55)     | 1 (5)      | 262.0                     | 95.4               |
| Simonneau <i>et al.</i><br>(2008) <sup>17</sup>  | Sildenafil          | 213 (80)                | 48                  | 71.4                | 3<br>(1)                           | 68 (26)      | 175<br>(66) | 16 (6)     | 345.3                     | 51.7               |
| Galiè <i>et al.</i> (2009) <sup>18</sup>         | Tadalafil           | 317 (78)                | 54                  | 75.4                | 4<br>(1)                           | 130<br>(32)  | 264<br>(65) | 7 (2)      | 343.6                     | 53.2               |
| Channick <i>et al.</i><br>(2001) <sup>19</sup>   | Bosentan            | 28 (85)                 | 51                  | 86.3                | 0                                  | 0            | 32<br>(100) | 0          | 358.3                     | 54.7               |
| Rubin <i>et al.</i> (2002) <sup>20</sup>         | Bosentan            | 168 (79)                | 48                  | 71.9                | 0                                  | 0            | 195<br>(92) | 18 (9)     | 334.5                     | 54.4               |
| Galiè <i>et al.</i> (2006) <sup>21</sup>         | Bosentan            | 33 (61)                 | 39                  | 63.7                | 0                                  | 0            | 54<br>(100) | 0          | 342.8                     | 76.0               |
| Galiè <i>et al.</i> (2008) <sup>22</sup>         | Bosentan            | 129 (70)                | 45                  | 68.1                | 0                                  | 185<br>(100) | 0           | 0          | 434.5                     | 52.4               |
| Galiè (2008) <sup>23</sup>                       | Ambrisentan         | 311 (79)                | 51                  | 72.1                | 8<br>(2)                           | 151<br>(38)  | 216<br>(55) | 18 (5)     | 344.6                     | 49.2               |
| Rubin <i>et al.</i> (1990) <sup>24</sup>         | Epoprostenol        | 16 (70)                 | 36                  | NR                  | 0                                  | 2 (9)        | 15 (65)     | 6 (26)     | 226.6                     | 60.3               |
| Barst <i>et al.</i> (1996) <sup>25</sup>         | Epoprostenol        | 59 (73)                 | 40                  | NR                  | 0                                  | 0            | 60 (74)     | 21<br>(26) | 294.3                     | 60.0               |
| Badesch <i>et al.</i><br>(2000) <sup>26</sup>    | Epoprostenol        | 96 (87)                 | 55                  | NR                  | 0                                  | 5 (5)        | 87 (78)     | 19<br>(17) | 255.9                     | 50.0               |
| Galiè <i>et al.</i> (2002) <sup>27</sup>         | Beraprost           | 80 (62)                 | 46                  | NR                  | 0                                  | 64 (49)      | 66 (51)     | 0          | 372.5                     | 59.5               |
| McLaughlin <i>et al.</i><br>(2006) <sup>28</sup> | Inhaled<br>iloprost | 53 (79)                 | 50                  | NR                  | 0                                  | 1 (2)        | 63 (94)     | 3 (5)      | 335                       | 52                 |

|    |                                                                                                                                         |              |          |    |    |   |         |         |        |       |      |
|----|-----------------------------------------------------------------------------------------------------------------------------------------|--------------|----------|----|----|---|---------|---------|--------|-------|------|
| 1  |                                                                                                                                         |              |          |    |    |   |         |         |        |       |      |
| 2  |                                                                                                                                         |              |          |    |    |   |         |         |        |       |      |
| 3  |                                                                                                                                         |              |          |    |    |   |         |         |        |       |      |
| 4  |                                                                                                                                         |              |          |    |    |   |         |         |        |       |      |
| 5  |                                                                                                                                         |              |          |    |    |   |         |         |        |       |      |
| 6  | Hoeper <i>et al.</i>                                                                                                                    | Inhaled      | 31 (78)  | 52 | NR | 0 | 0       | 40      | 0      | 306.0 | 56.6 |
| 7  | (2006) <sup>29</sup>                                                                                                                    | iloprost     |          |    |    |   |         | (100)   |        |       |      |
| 8  | Simonneau (2002) <sup>30</sup>                                                                                                          | Treprostinil | 382 (81) | 45 | NR | 0 | 53 (11) | 382     | 34 (7) | 326.5 | 61.0 |
| 9  |                                                                                                                                         |              |          |    |    |   |         | (81)    |        |       |      |
| 10 | McLaughlin <i>et al.</i>                                                                                                                | Treprostinil | 21 (81)  | 37 | NR | 0 | 25 (96) | 1 (4)   | 0      | 376.8 | 60.7 |
| 11 | (2003) <sup>31</sup>                                                                                                                    |              |          |    |    |   |         |         |        |       |      |
| 12 | McLaughlin <i>et al.</i>                                                                                                                | Treprostinil | 191 (81) | 54 | NR | 0 | 0       | 230     | 5 (2)  | 348.6 | NR   |
| 13 | (2010) <sup>32</sup>                                                                                                                    |              |          |    |    |   |         | (98)    |        |       |      |
| 14 | Hiremath <i>et al.</i>                                                                                                                  | Treprostinil | 27 (61)  | 32 | 47 | 0 | 0       | 42 (95) | 2 (5)  | 250.4 | 65   |
| 15 | (2010) <sup>33</sup>                                                                                                                    |              |          |    |    |   |         |         |        |       |      |
| 16 |                                                                                                                                         |              |          |    |    |   |         |         |        |       |      |
| 17 |                                                                                                                                         |              |          |    |    |   |         |         |        |       |      |
| 18 | NR, not reported; PAH, pulmonary arterial hypertension; PAP, pulmonary artery pressure; 6MWD, 6-minute walk distance; WHO, World Health |              |          |    |    |   |         |         |        |       |      |
| 19 | Organisation.                                                                                                                           |              |          |    |    |   |         |         |        |       |      |
| 20 |                                                                                                                                         |              |          |    |    |   |         |         |        |       |      |
| 21 |                                                                                                                                         |              |          |    |    |   |         |         |        |       |      |
| 22 |                                                                                                                                         |              |          |    |    |   |         |         |        |       |      |
| 23 |                                                                                                                                         |              |          |    |    |   |         |         |        |       |      |
| 24 |                                                                                                                                         |              |          |    |    |   |         |         |        |       |      |
| 25 |                                                                                                                                         |              |          |    |    |   |         |         |        |       |      |
| 26 |                                                                                                                                         |              |          |    |    |   |         |         |        |       |      |
| 27 |                                                                                                                                         |              |          |    |    |   |         |         |        |       |      |
| 28 |                                                                                                                                         |              |          |    |    |   |         |         |        |       |      |
| 29 |                                                                                                                                         |              |          |    |    |   |         |         |        |       |      |
| 30 |                                                                                                                                         |              |          |    |    |   |         |         |        |       |      |
| 31 |                                                                                                                                         |              |          |    |    |   |         |         |        |       |      |
| 32 |                                                                                                                                         |              |          |    |    |   |         |         |        |       |      |
| 33 |                                                                                                                                         |              |          |    |    |   |         |         |        |       |      |
| 34 |                                                                                                                                         |              |          |    |    |   |         |         |        |       |      |
| 35 |                                                                                                                                         |              |          |    |    |   |         |         |        |       |      |
| 36 |                                                                                                                                         |              |          |    |    |   |         |         |        |       |      |
| 37 |                                                                                                                                         |              |          |    |    |   |         |         |        |       |      |
| 38 |                                                                                                                                         |              |          |    |    |   |         |         |        |       |      |
| 39 |                                                                                                                                         |              |          |    |    |   |         |         |        |       |      |
| 40 |                                                                                                                                         |              |          |    |    |   |         |         |        |       |      |
| 41 |                                                                                                                                         |              |          |    |    |   |         |         |        |       |      |
| 42 |                                                                                                                                         |              |          |    |    |   |         |         |        |       |      |
| 43 |                                                                                                                                         |              |          |    |    |   |         |         |        |       |      |
| 44 |                                                                                                                                         |              |          |    |    |   |         |         |        |       |      |
| 45 |                                                                                                                                         |              |          |    |    |   |         |         |        |       |      |
| 46 |                                                                                                                                         |              |          |    |    |   |         |         |        |       |      |
| 47 |                                                                                                                                         |              |          |    |    |   |         |         |        |       |      |
| 48 |                                                                                                                                         |              |          |    |    |   |         |         |        |       |      |
| 49 |                                                                                                                                         |              |          |    |    |   |         |         |        |       |      |

NR, not reported; PAH, pulmonary arterial hypertension; PAP, pulmonary artery pressure; 6MWD, 6-minute walk distance; WHO, World Health Organisation.



**Supplementary table 2** Baseline characteristics of patients with CTD-PAH

| Study                                      | PAH agent    | Female, <i>n</i> (%) | Mean age (years) | Mean weight (kg) | WHO functional class, <i>n</i> (%) |         |         |         | Mean baseline 6MWD (m) | Mean PAP (mmHg) |
|--------------------------------------------|--------------|----------------------|------------------|------------------|------------------------------------|---------|---------|---------|------------------------|-----------------|
|                                            |              |                      |                  |                  | I                                  | II      | III     | IV      |                        |                 |
| Badesch <i>et al.</i> (2007) <sup>34</sup> | Sildenafil   | 70 (83)              | 53               | NR               | 0                                  | 32 (38) | 51 (61) | 1 (1)   | 342                    | 47              |
| Galiè <i>et al.</i> (2009) <sup>18</sup>   | Tadalafil    | NR                   | NR               | NR               | NR                                 | NR      | NR      | NR      | NR                     | NR              |
| Denton <i>et al.</i> (2006) <sup>35</sup>  | Bosentan     | 55 (83)              | 55               | NR               | 0                                  | 0       | 63 (96) | 3 (5)   | 328.3                  | 46.4            |
| Launay <i>et al.</i> (2010) <sup>36</sup>  | Bosentan     | 36 (74)              | NR               | NR               | 0                                  | 6 (12)  | 38 (78) | 5 (10)  | 268                    | 46              |
| Badesch (2007) <sup>37</sup>               | Ambrisentan  | NR                   | NR               | NR               | NR                                 | NR      | NR      | NR      | 335                    | NR              |
| Badesch <i>et al.</i> (2012) <sup>38</sup> | Ambrisentan  | 36 (90)              | 55               | NR               | 0                                  | 12 (30) | 27 (68) | 1 (3)   | 324                    | 45              |
| Badesch <i>et al.</i> (2000) <sup>26</sup> | Epoprostenol | 96 (87)              | 55               | NR               | 0                                  | 5 (5)   | 87 (78) | 19 (17) | 255.9                  | 50.0            |
| Kunieda <i>et al.</i> (2009) <sup>39</sup> | Beraprost    | 18 (95)              | 45               | 47.6             | 3 (16)                             | 12 (63) | 4 (21)  | 0       | 367.9                  | 39.2            |
| Oudiz <i>et al.</i> (2004) <sup>40</sup>   | Treprostinil | 81 (90)              | 51               | NR               | 0                                  | 9 (10)  | 67 (74) | 14 (16) | 288.7                  | NR              |

CTD, connective tissue disease; NR, not reported; PAH, pulmonary arterial hypertension; PAP, pulmonary artery pressure; 6MWD, 6-minute walk distance; WHO, World Health Organisation.

Supplementary table 3 Risk of bias

| Source                                        | PAH agent        | Random sequence generation | Allocation concealment | Blinding | Other source(s) of bias |
|-----------------------------------------------|------------------|----------------------------|------------------------|----------|-------------------------|
| All forms of PAH                              |                  |                            |                        |          |                         |
| Galiè <i>et al.</i> (2005) <sup>15</sup>      | Sildenafil       | Unclear                    | Low                    | Low      | Low                     |
| Singh <i>et al.</i> (2006) <sup>16</sup>      | Sildenafil       | Unclear                    | Low                    | Low      | Low                     |
| Simonneau <i>et al.</i> (2008) <sup>17</sup>  | Sildenafil       | Low                        | Low                    | Low      | High                    |
| Galiè <i>et al.</i> (2009) <sup>18</sup>      | Tadalafil        | Unclear                    | Unclear                | Low      | Low                     |
| Channick <i>et al.</i> (2001) <sup>19</sup>   | Bosentan         | Low                        | Low                    | Low      | Low                     |
| Rubin <i>et al.</i> (2002) <sup>20</sup>      | Bosentan         | Unclear                    | Unclear                | Low      | Low                     |
| Galiè <i>et al.</i> (2006) <sup>21</sup>      | Bosentan         | Unclear                    | Low                    | Low      | Low                     |
| Galiè <i>et al.</i> (2008) <sup>22</sup>      | Bosentan         | Low                        | Low                    | Low      | Low                     |
| Galiè (2008) <sup>23</sup>                    | Ambrisentan      | Unclear                    | Low                    | Low      | Low                     |
| Rubin <i>et al.</i> (1990) <sup>24</sup>      | Epoprostenol     | Unclear                    | Low                    | High     | Unclear                 |
| Barst <i>et al.</i> (1996) <sup>25</sup>      | Epoprostenol     | Low                        | Unclear                | High     | High                    |
| Badesch <i>et al.</i> (2000) <sup>26</sup>    | Epoprostenol     | Low                        | Unclear                | High     | Low                     |
| Galiè <i>et al.</i> (2002) <sup>27</sup>      | Beraprost        | Unclear                    | Unclear                | Low      | Low                     |
| McLaughlin <i>et al.</i> (2006) <sup>28</sup> | Inhaled iloprost | Low                        | Low                    | Low      | Low                     |
| Hoeper <i>et al.</i> (2006) <sup>29</sup>     | Inhaled iloprost | Low                        | Low                    | High     | High                    |
| Simonneau (2002) <sup>30</sup>                | Treprostinil     | Low                        | Unclear                | Low      | Low                     |
| McLaughlin <i>et al.</i> (2003) <sup>31</sup> | Treprostinil     | Unclear                    | Unclear                | Low      | Low                     |
| McLaughlin <i>et al.</i> (2010) <sup>32</sup> | Treprostinil     | Unclear                    | Unclear                | Low      | Low                     |
| Hiremath <i>et al.</i> (2010) <sup>33</sup>   | Treprostinil     | Unclear                    | Unclear                | Low      | Low                     |
| CTD-PAH                                       |                  |                            |                        |          |                         |
| Badesch <i>et al.</i> (2007) <sup>34</sup>    | Sildenafil       | Unclear                    | Low                    | Low      | Low                     |
| Galiè <i>et al.</i> (2009) <sup>18</sup>      | Tadalafil        | Unclear                    | Unclear                | Low      | Low                     |
| Denton <i>et al.</i> (2006) <sup>35</sup>     | Bosentan         | Unclear                    | Unclear                | Low      | High                    |
| Launay <i>et al.</i> (2010) <sup>36</sup>     | Bosentan         | High                       | High                   | High     | High                    |

1  
2  
3  
4  
5  
6  
7  
8  
9  
10  
11  
12  
13  
14  
15  
16  
17  
18  
19  
20  
21  
22  
23  
24  
25  
26  
27  
28  
29  
30  
31  
32  
33  
34  
35  
36  
37  
38  
39  
40  
41  
42  
43  
44  
45  
46  
47  
48  
49

| Source                                     | PAH agent    | Random sequence generation | Allocation concealment | Blinding | Other source(s) of bias |
|--------------------------------------------|--------------|----------------------------|------------------------|----------|-------------------------|
| Badesch (2007) <sup>37</sup>               | Ambrisentan  | Unclear                    | Low                    | Low      | Unclear                 |
| Badesch <i>et al.</i> (2012) <sup>38</sup> | Ambrisentan  | High                       | High                   | High     | High                    |
| Badesch <i>et al.</i> (2000) <sup>26</sup> | Epoprostenol | Low                        | Unclear                | No       | Low                     |
| Kunieda <i>et al.</i> (2009) <sup>39</sup> | Beraprost    | High                       | High                   | High     | High                    |
| Oudiz <i>et al.</i> (2004) <sup>40</sup>   | Treprostinil | Unclear                    | Unclear                | Low      | Low                     |

CTD, connective tissue disease; PAH, pulmonary arterial hypertension.

peer review only

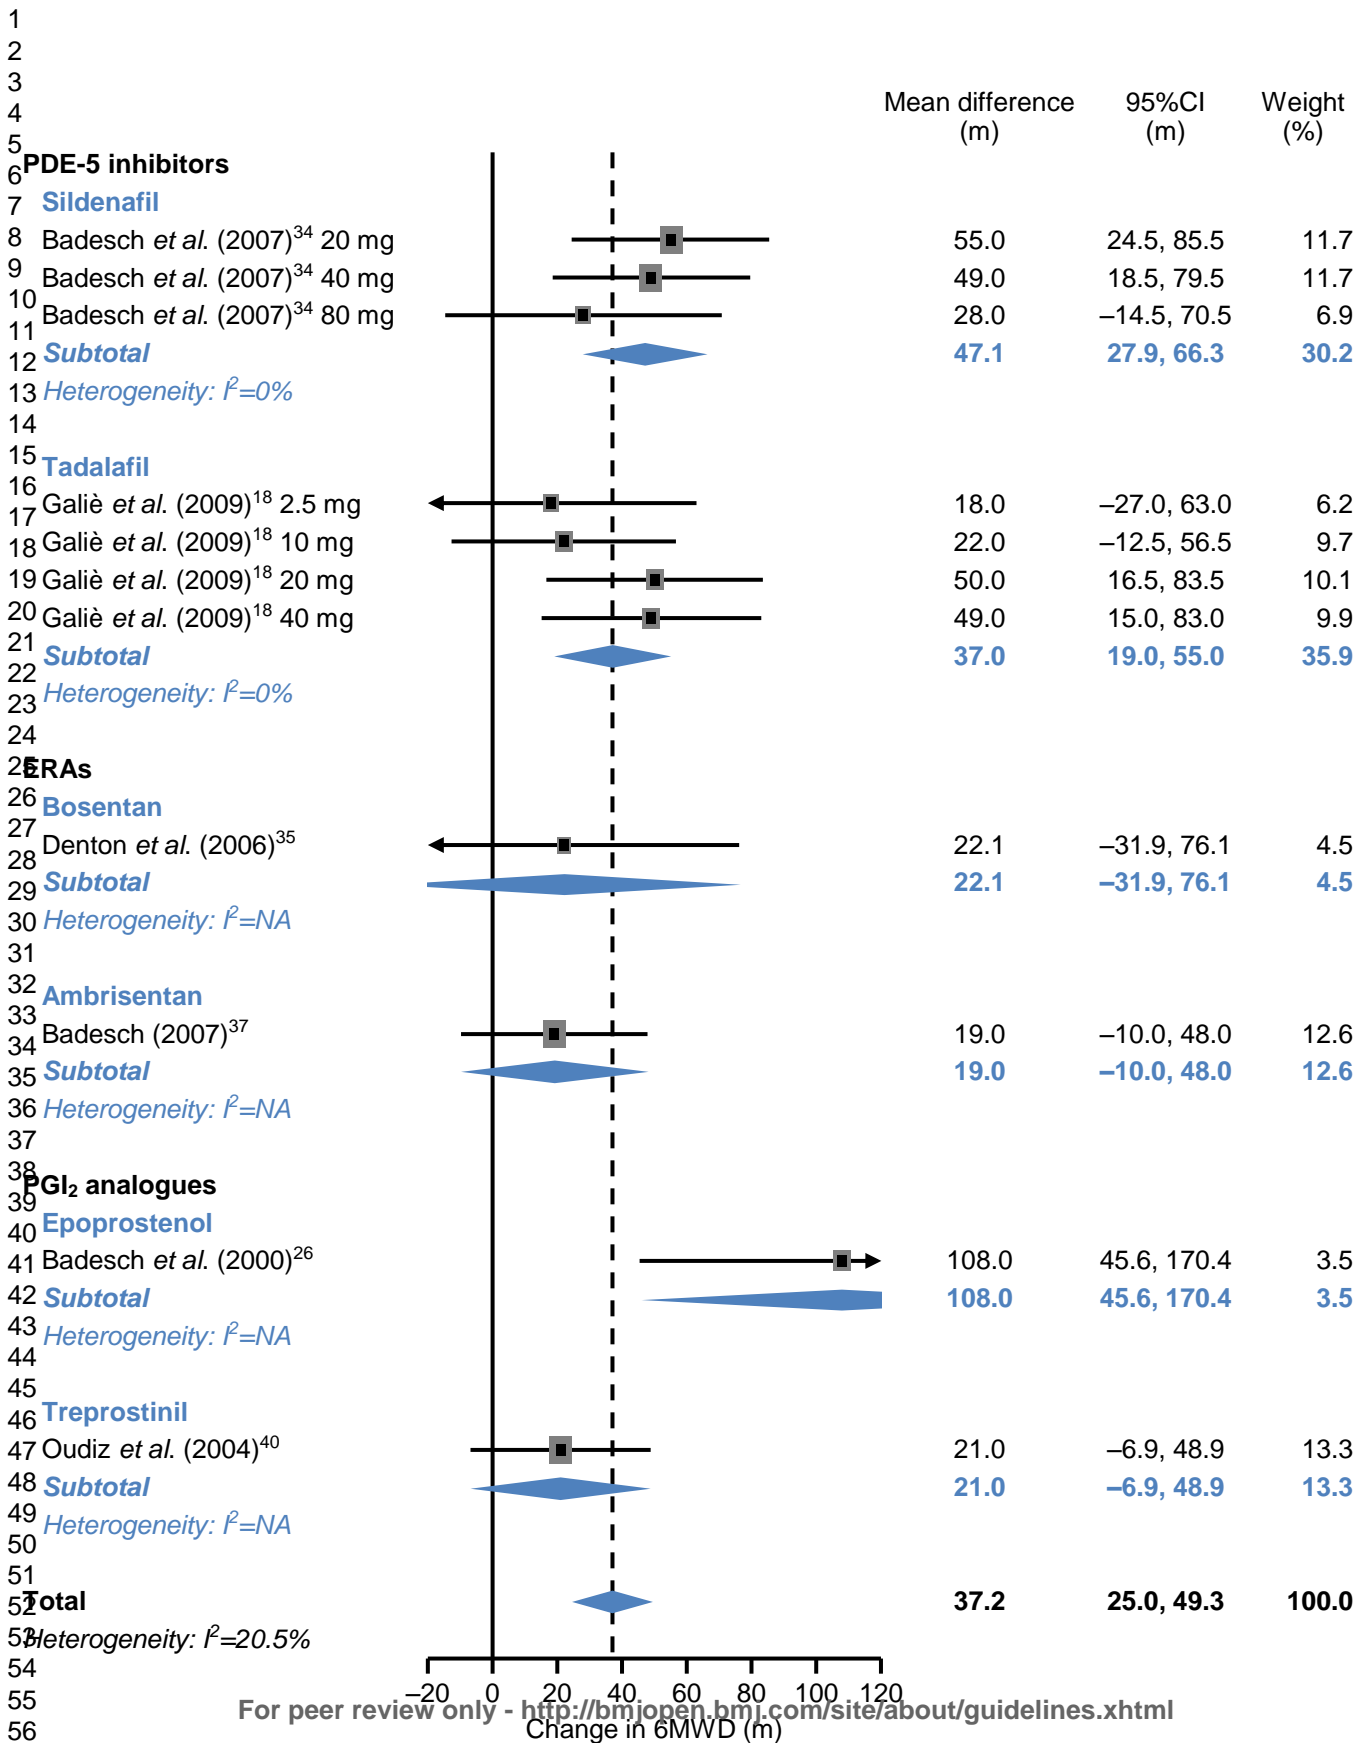



# PRISMA 2009 Checklist

| Section/topic                      | #  | Checklist item                                                                                                                                                                                                                                                                                              | Reported on page # |
|------------------------------------|----|-------------------------------------------------------------------------------------------------------------------------------------------------------------------------------------------------------------------------------------------------------------------------------------------------------------|--------------------|
| <b>TITLE</b>                       |    |                                                                                                                                                                                                                                                                                                             |                    |
| Title                              | 1  | Identify the report as a systematic review, meta-analysis, or both.                                                                                                                                                                                                                                         | 1                  |
| <b>ABSTRACT</b>                    |    |                                                                                                                                                                                                                                                                                                             |                    |
| Structured summary                 | 2  | Provide a structured summary including, as applicable: background; objectives; data sources; study eligibility criteria, participants, and interventions; study appraisal and synthesis methods; results; limitations; conclusions and implications of key findings; systematic review registration number. | 2                  |
| <b>INTRODUCTION</b>                |    |                                                                                                                                                                                                                                                                                                             |                    |
| Rationale                          | 3  | Describe the rationale for the review in the context of what is already known.                                                                                                                                                                                                                              | 5-6                |
| Objectives                         | 4  | Provide an explicit statement of questions being addressed with reference to participants, interventions, comparisons, outcomes, and study design (PICOS).                                                                                                                                                  | 6                  |
| <b>METHODS</b>                     |    |                                                                                                                                                                                                                                                                                                             |                    |
| Protocol and registration          | 5  | Indicate if a review protocol exists, if and where it can be accessed (e.g., Web address), and, if available, provide registration information including registration number.                                                                                                                               | n/a                |
| Eligibility criteria               | 6  | Specify study characteristics (e.g., PICOS, length of follow-up) and report characteristics (e.g., years considered, language, publication status) used as criteria for eligibility, giving rationale.                                                                                                      | 7                  |
| Information sources                | 7  | Describe all information sources (e.g., databases with dates of coverage, contact with study authors to identify additional studies) in the search and date last searched.                                                                                                                                  | 7                  |
| Search                             | 8  | Present full electronic search strategy for at least one database, including any limits used, such that it could be repeated.                                                                                                                                                                               | 7                  |
| Study selection                    | 9  | State the process for selecting studies (i.e., screening, eligibility, included in systematic review, and, if applicable, included in the meta-analysis).                                                                                                                                                   | 7                  |
| Data collection process            | 10 | Describe method of data extraction from reports (e.g., piloted forms, independently, in duplicate) and any processes for obtaining and confirming data from investigators.                                                                                                                                  | 8                  |
| Data items                         | 11 | List and define all variables for which data were sought (e.g., PICOS, funding sources) and any assumptions and simplifications made.                                                                                                                                                                       | 7-8                |
| Risk of bias in individual studies | 12 | Describe methods used for assessing risk of bias of individual studies (including specification of whether this was done at the study or outcome level), and how this information is to be used in any data synthesis.                                                                                      | 8                  |
| Summary measures                   | 13 | State the principal summary measures (e.g., risk ratio, difference in means).                                                                                                                                                                                                                               | 7-8                |
| Synthesis of results               | 14 | Describe the methods of handling data and combining results of studies, if done, including measures of consistency (e.g., $I^2$ ) for each meta-analysis.                                                                                                                                                   | 8                  |

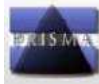

# PRISMA 2009 Checklist

| Section/topic                 | #  | Checklist item                                                                                                                                                                                           | Reported on page #      |
|-------------------------------|----|----------------------------------------------------------------------------------------------------------------------------------------------------------------------------------------------------------|-------------------------|
| Risk of bias across studies   | 15 | Specify any assessment of risk of bias that may affect the cumulative evidence (e.g., publication bias, selective reporting within studies).                                                             | 8                       |
| Additional analyses           | 16 | Describe methods of additional analyses (e.g., sensitivity or subgroup analyses, meta-regression), if done, indicating which were pre-specified.                                                         | n/a                     |
| <b>RESULTS</b>                |    |                                                                                                                                                                                                          |                         |
| Study selection               | 17 | Give numbers of studies screened, assessed for eligibility, and included in the review, with reasons for exclusions at each stage, ideally with a flow diagram.                                          | 8–9 and Fig. 1          |
| Study characteristics         | 18 | For each study, present characteristics for which data were extracted (e.g., study size, PICOS, follow-up period) and provide the citations.                                                             | 9–10 and Tables 1 and 2 |
| Risk of bias within studies   | 19 | Present data on risk of bias of each study and, if available, any outcome level assessment (see item 12).                                                                                                | 13 and Suppl. table 3   |
| Results of individual studies | 20 | For all outcomes considered (benefits or harms), present, for each study: (a) simple summary data for each intervention group (b) effect estimates and confidence intervals, ideally with a forest plot. | 11–13, Figs 2 and 3     |
| Synthesis of results          | 21 | Present results of each meta-analysis done, including confidence intervals and measures of consistency.                                                                                                  | 11–13, Figs 2 and 3     |
| Risk of bias across studies   | 22 | Present results of any assessment of risk of bias across studies (see Item 15).                                                                                                                          | 13 and Suppl. table 3   |
| Additional analysis           | 23 | Give results of additional analyses, if done (e.g., sensitivity or subgroup analyses, meta-regression [see Item 16]).                                                                                    | n/a                     |
| <b>DISCUSSION</b>             |    |                                                                                                                                                                                                          |                         |
| Summary of evidence           | 24 | Summarize the main findings including the strength of evidence for each main outcome; consider their relevance to key groups (e.g., healthcare providers, users, and policy makers).                     | 14                      |
| Limitations                   | 25 | Discuss limitations at study and outcome level (e.g., risk of bias), and at review-level (e.g., incomplete retrieval of identified research, reporting bias).                                            | 15–16                   |
| Conclusions                   | 26 | Provide a general interpretation of the results in the context of other evidence, and implications for future research.                                                                                  | 16-17                   |
| <b>FUNDING</b>                |    |                                                                                                                                                                                                          |                         |



# PRISMA 2009 Checklist

1  
2  
3  
4  
5  
6  
7  
8  
9  
10  
11  
12  
13  
14  
15  
16  
17  
18  
19  
20  
21  
22  
23  
24  
25  
26  
27  
28  
29  
30  
31  
32  
33  
34  
35  
36  
37  
38  
39  
40  
41  
42  
43  
44  
45  
46  
47  
48  
49

|         |    |                                                                                                                                            |    |
|---------|----|--------------------------------------------------------------------------------------------------------------------------------------------|----|
| Funding | 27 | Describe sources of funding for the systematic review and other support (e.g., supply of data); role of funders for the systematic review. | 17 |
|---------|----|--------------------------------------------------------------------------------------------------------------------------------------------|----|

From: Moher D, Liberati A, Tetzlaff J, Altman DG, The PRISMA Group (2009). Preferred Reporting Items for Systematic Reviews and Meta-Analyses: The PRISMA Statement. PLoS Med 6(6): e1000097. doi:10.1371/journal.pmed1000097

For more information, visit: [www.prisma-statement.org](http://www.prisma-statement.org).

Page 2 of 2

For peer review only
